# Supplementary material for: DrugReX: an explainable drug repurposing system powered by large language models and literature-based knowledge graph
Source: Research Square preprint supplement (doi:10.21203/rs.3.rs-6728958/v1), 2025-06-16
Supplement: Supplementary file 1 [file 1cb7698c96e318aeb83f6909.pdf]

# **DrugReX: an explainable drug repurposing system powered by large language models and literature-based knowledge graph**

**Liang-Chin Huang<sup>1</sup>, Hunki Paek<sup>1</sup>, Kyeryoung Lee<sup>1</sup>, Ediz Calay<sup>1</sup>, Deepak Pillai<sup>1</sup>, Nneka Ofoegbu<sup>1</sup>, Bin Lin<sup>1</sup>, Hua Xu<sup>2</sup>, and Xiaoyan Wang<sup>1, 3, \*</sup>**

<sup>1</sup>IMO Health, Rosemont, IL, 60018, USA

<sup>2</sup>Department of Biomedical Informatics and Data Science, Yale School of Medicine, New Haven, CT, 06510, USA

<sup>3</sup>Department of Health Policy and Management, Tulane University, New Orleans, LA, 70118, USA

\*xw108@caa.columbia.edu

**Supplementary Figures and Tables**

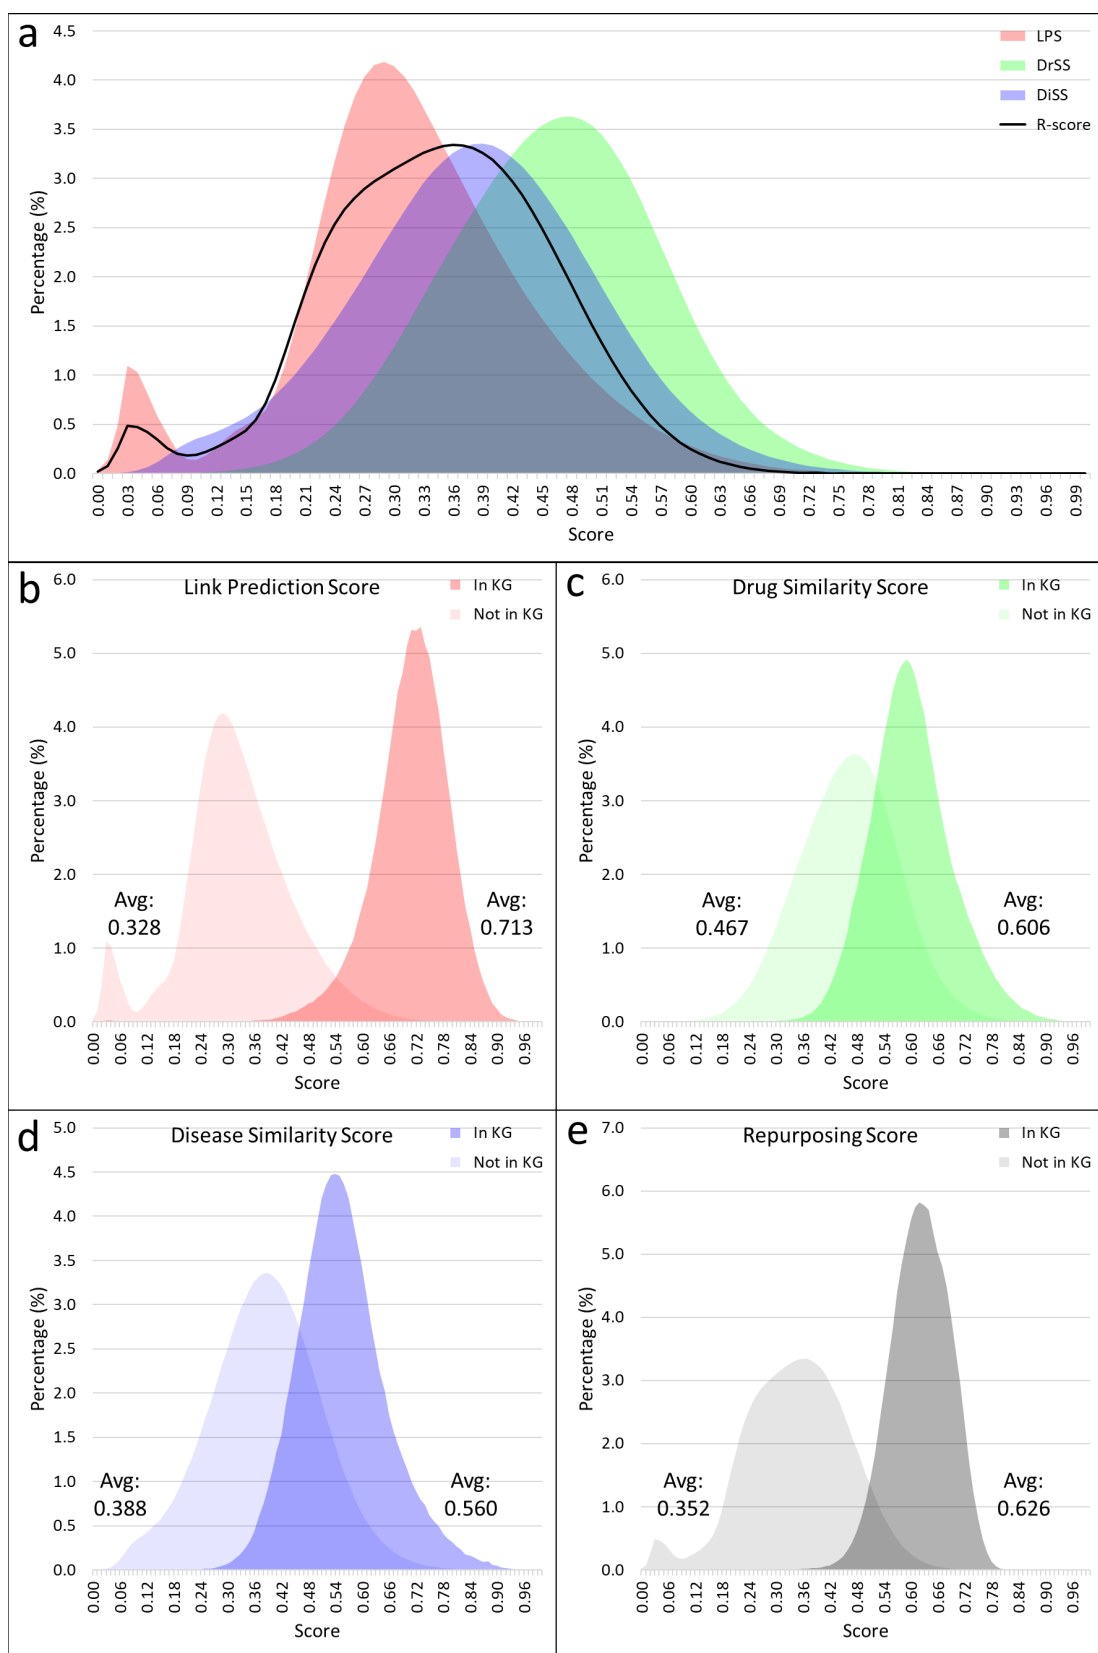

**Figure S1.** Distributions of different scores in the scoring system. LPS: Link Prediction Score; DrSS: Drug Similarity Score; DiSS: Disease Similarity Score; R-score: Repurposing Score; KG: knowledge graph. The average score for each group is labeled.

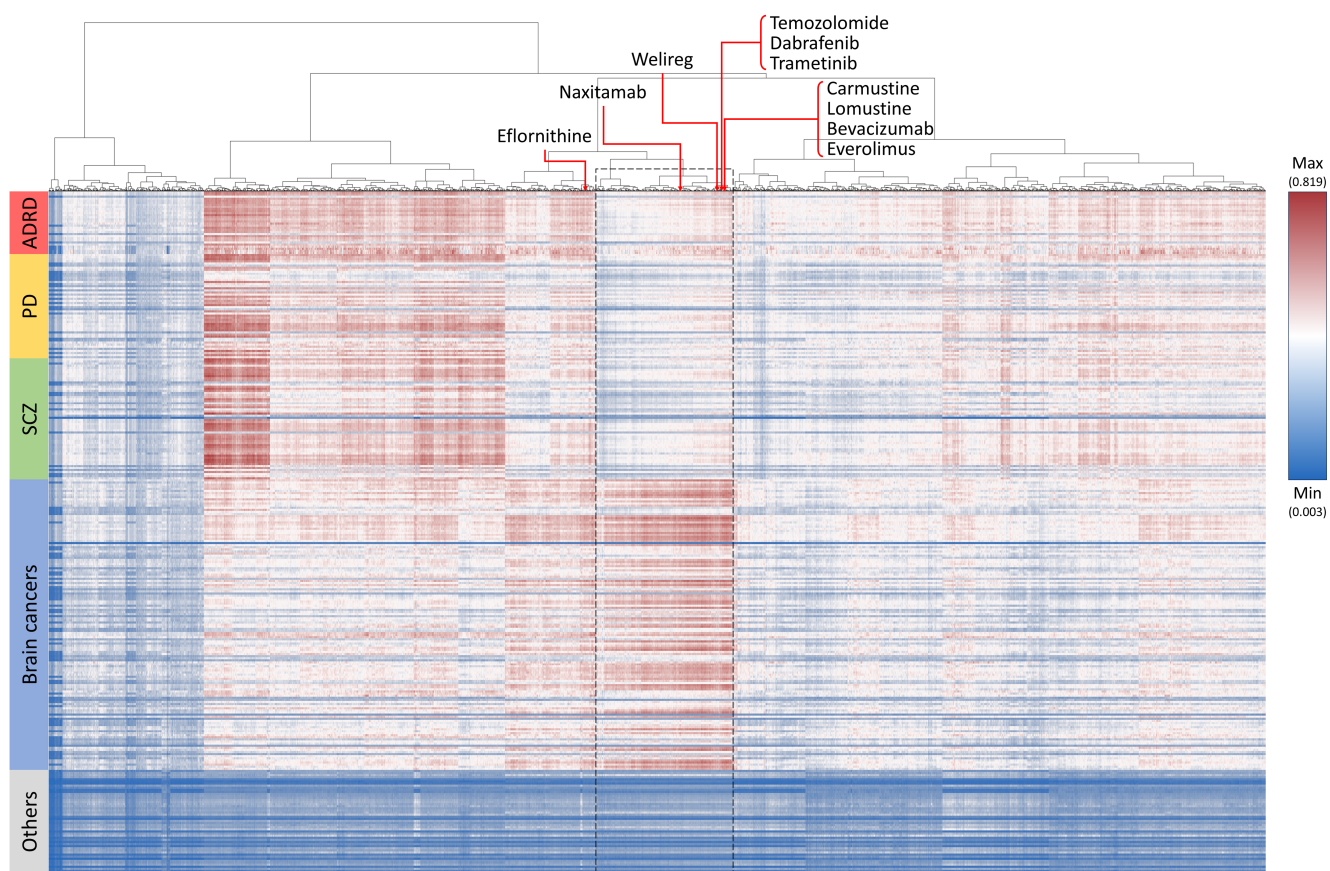

**Figure S2.** Clustering analysis for FDA-approved brain cancer drugs. Brain cancer drugs are indicated by red arrows. PD: Parkinson's disease; SCZ: schizophrenia.

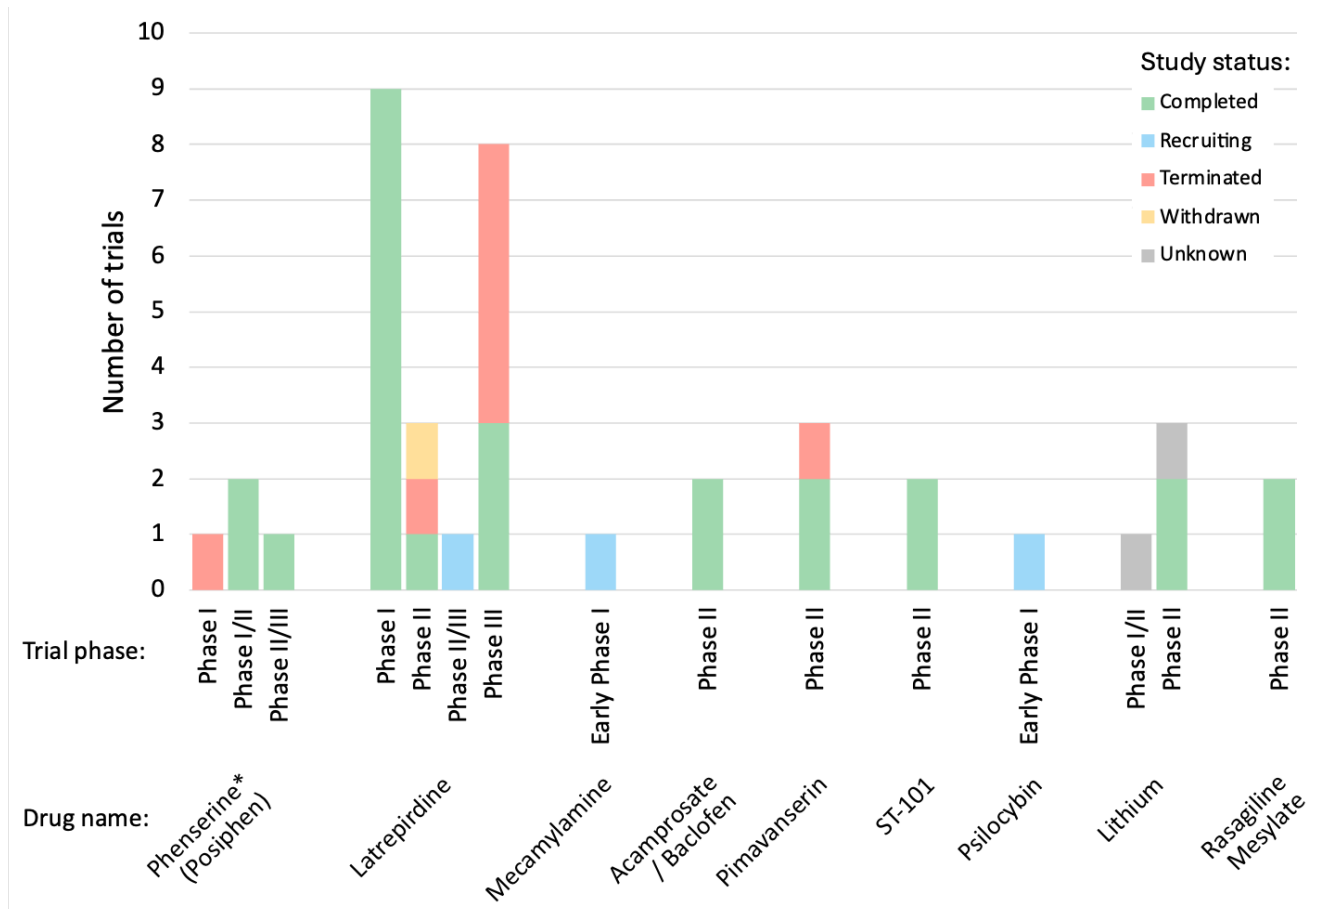

**Figure S3.** Candidate ADRD drugs with clinical trials for treating ADRD.

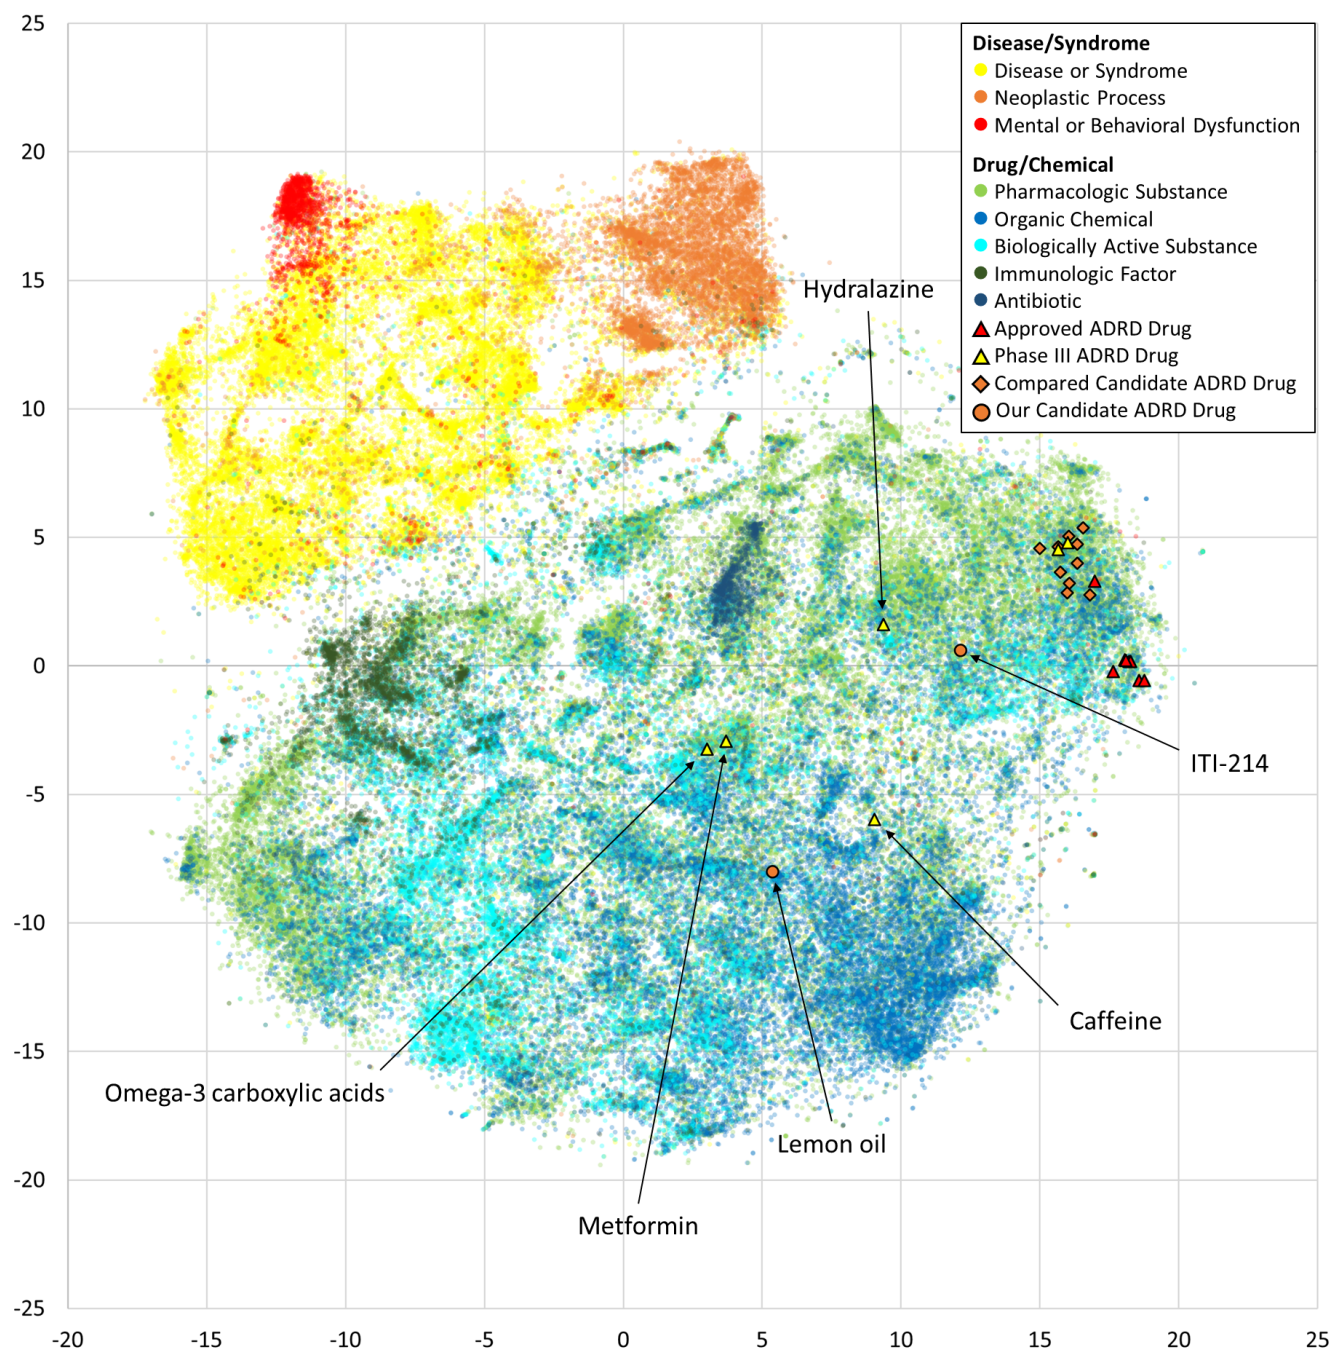

**Figure S4.** Visualization of compared candidate drugs embedded in a 2D space.

| Iteration | BERT <sub>cased</sub> | BERT <sub>uncased</sub> | BioBERT | BioClinicalBERT | BlueBERT | PubMedBERT    |
|-----------|-----------------------|-------------------------|---------|-----------------|----------|---------------|
| 1         | 0.6667                | 0.6651                  | 0.7625  | 0.7410          | 0.7316   | 0.7919        |
| 2         | 0.6566                | 0.6451                  | 0.7372  | 0.7355          | 0.7308   | 0.7697        |
| 3         | 0.6724                | 0.6690                  | 0.7467  | 0.7425          | 0.7337   | 0.7805        |
| 4         | 0.6391                | 0.6635                  | 0.7302  | 0.7476          | 0.7504   | 0.7788        |
| 5         | 0.6612                | 0.6651                  | 0.7384  | 0.7267          | 0.7352   | 0.7886        |
| 6         | 0.6599                | 0.6620                  | 0.7851  | 0.7428          | 0.7379   | <b>0.8082</b> |
| 7         | 0.6590                | 0.6675                  | 0.7925  | 0.7446          | 0.7061   | 0.7912        |
| 8         | 0.6737                | 0.6468                  | 0.7606  | 0.7524          | 0.6881   | 0.7820        |
| 9         | 0.6635                | 0.6675                  | 0.7540  | 0.7414          | 0.7234   | 0.7610        |
| 10        | 0.6643                | 0.6667                  | 0.7910  | 0.7206          | 0.7197   | 0.7880        |

**Table S1.** Performance (F<sub>1</sub> score) of relation classification using BERT-based models. The best performing model is highlighted in bold.

| <b>Entity type</b> | <b>Semantic type defined by UMLS</b>    | <b>Count</b>   |
|--------------------|-----------------------------------------|----------------|
| Drug/Chemical      | Pharmacologic Substance                 | 48,461         |
|                    | Organic Chemical                        | 26,086         |
|                    | Biologically Active Substance           | 13,254         |
|                    | Immunologic Factor                      | 4,171          |
|                    | Antibiotic                              | 1,774          |
|                    | Subtotal                                | 93,746         |
| Gene/Protein       | Gene or Genome                          | 41,800         |
|                    | Enzyme                                  | 8,702          |
|                    | Amino Acid, Peptide, or Protein         | 7,640          |
|                    | Nucleic Acid, Nucleoside, or Nucleotide | 1,528          |
|                    | Subtotal                                | 59,670         |
| Disease/Syndrome   | Disease or Syndrome                     | 25,972         |
|                    | Neoplastic Process                      | 7,898          |
|                    | Mental or Behavioral Dysfunction        | 1,746          |
|                    | Subtotal                                | 35,616         |
| Pathway/Function   | Molecular Function                      | 7,369          |
|                    | Cell Function                           | 3,559          |
|                    | Genetic Function                        | 1,140          |
|                    | Subtotal                                | 12,068         |
| Others             | Finding                                 | 21,276         |
|                    | Therapeutic or Preventive Procedure     | 11,115         |
|                    | Body Part, Organ, or Organ Component    | 4,998          |
|                    | Laboratory Procedure                    | 457            |
|                    | Others                                  | 43,125         |
|                    | Subtotal                                | 80,971         |
| <b>Total</b>       |                                         | <b>282,071</b> |

**Table S2.** Number of entities in the LitKG.

| Relation type         | # Relations | # Sentences | Example sentence                                                                                                                                                                                                                                                                           |
|-----------------------|-------------|-------------|--------------------------------------------------------------------------------------------------------------------------------------------------------------------------------------------------------------------------------------------------------------------------------------------|
| ASSOCIATED_WITH       | 6,297,142   | 19,261,066  | Amyloid beta ( $A\beta$ ) peptides are characterized as the major factors <b>associated with</b> neuron death in <u>Alzheimer's disease</u> <sup>1</sup>                                                                                                                                   |
| CAUSES                | 2,789,328   | 9,768,918   | <u><math>\beta</math>-amyloidosis</u> and oxidative stress have been implicated as root <b>causes</b> of <u>Alzheimer's disease</u> <sup>2</sup>                                                                                                                                           |
| COEXISTS_WITH         | 4,034,508   | 11,110,829  | Because cerebral amyloid angiopathy-related hemorrhage often <b>co-exists with</b> <u>AD</u> , we examined the IL-1A polymorphism in cerebral amyloid angiopathy-related hemorrhage <sup>3</sup>                                                                                           |
| COMPLICATES           | 92,645      | 152,195     | <u>Alzheimer's disease</u> <b>complicated</b> by a terminal <u>salmonella infection</u> <sup>4</sup>                                                                                                                                                                                       |
| INHIBITS              | 2,964,981   | 6,220,215   | <u>Berberine</u> (BBR) can improve antioxidative capacity and <b>inhibit</b> A $\beta$ protein aggregation and tau protein hyperphosphorylation in AD, and stem cell therapy is also increasingly recognized as a therapy for AD <sup>5</sup>                                              |
| INTERACTS_WITH        | 2,970,495   | 7,237,927   | These in vitro <b>interactions</b> between tau protein and <u>sulfated glycosaminoglycans</u> reproduced the known characteristics of paired helical filament-tau from Alzheimer's disease brain <sup>6</sup>                                                                              |
| MANIFESTATION_OF      | 66,108      | 120,821     | In its earliest clinical <b>manifestation</b> , <u>AD</u> often presents as Mild Cognitive Impairment (MCI), a term used to describe older adults with cognitive decline that is more severe than expected for healthy aging but does not meet standard criteria for dementia <sup>7</sup> |
| PRODUCES              | 701,231     | 2,026,850   | Biochemical characterization of the <u>gamma-secretase</u> activity that <b>produces</b> beta-amyloid peptides <sup>8</sup>                                                                                                                                                                |
| STIMULATES            | 2,812,479   | 6,848,726   | In conclusion, <u>aluminum</u> appears to <b>induce</b> isolated <u>tau protein</u> to aggregate in a phosphate-independent way, without the formation of fibrils <sup>9</sup>                                                                                                             |
| TREATS                | 1,854,718   | 8,733,721   | In conclusion, the well-known antidiabetic drug, <u>metformin</u> , could be a promising drug for <u>AD treatment</u> <sup>10</sup>                                                                                                                                                        |
| <b>Total (unique)</b> | 24,583,635  | 66,324,693  |                                                                                                                                                                                                                                                                                            |

**Table S3.** Number of relations and supporting sentences in the LitKG. Subjects and objects are highlighted by underlining; relations are highlighted in bold.

| Algorithm        | MR            | MRR           | HITS@1        | HITS@3        | HITS@10       |
|------------------|---------------|---------------|---------------|---------------|---------------|
| ComplEx          | 1.7391        | 0.8325        | 0.7280        | <b>0.9306</b> | 0.9872        |
| DistMult         | 1.7738        | 0.8232        | 0.7144        | 0.9243        | 0.9870        |
| RotatE           | 3.3377        | 0.5705        | 0.3793        | 0.7018        | 0.9533        |
| TransE           | 2.0370        | 0.7710        | 0.6396        | 0.8868        | 0.9817        |
| <b>TransE_l1</b> | <b>1.6969</b> | <b>0.8327</b> | <b>0.7295</b> | 0.9276        | <b>0.9896</b> |
| TransE_l2        | 2.0974        | 0.7676        | 0.6356        | 0.8838        | 0.9786        |

**Table S4.** Performance of knowledge graph embedding models. MR: mean rank; MRR: mean reciprocal rank. TransE\_l1: TransE regularized by L1 normalization; TransE\_l2: TransE regularized by L2 normalization. The best algorithm and performances are highlighted in bold.

| Task                                                                                          | Hypothesis                                                                                                                                                                                                                                                                                               |
|-----------------------------------------------------------------------------------------------|----------------------------------------------------------------------------------------------------------------------------------------------------------------------------------------------------------------------------------------------------------------------------------------------------------|
| Generating a hypothesis based on supporting sentences ("LitKG-GPT4")                          | "Based on your knowledge and the following evidence, generate a hypothesis of how {DRUG} can treat Alzheimer's disease in a paragraph and provide citations in the format [number, number, ...].<br>1. {SENTENCE 1}<br>2. {SENTENCE 2}<br>..."                                                           |
| Generating a hypothesis based on supporting sentences and unrelated sentences ("LitKG'-GPT4") | "Based on your knowledge and the following evidence, generate a hypothesis of how {DRUG} can treat Alzheimer's disease in a paragraph and provide citations in the format [number, number, ...].<br>1. {SENTENCE 1}<br>2. {UNREL_SENT 2}<br>..."                                                         |
| Generating a hypothesis based on relation types and unrelated relations ("KG-GPT4")           | "Based on your knowledge and the following evidence, generate a hypothesis of how {DRUG} can treat Alzheimer's disease in a paragraph and provide citations in the format [number, number, ...].<br>1. {SUBJECT 1} {RELATION 1} {OBJECT 1}<br>2. {UNREL_SUBJECT 2} {RELATION 2} {UNREL_OBJECT 2}<br>..." |
| Generating a hypothesis without further information ("GPT4")                                  | "Based on your knowledge, generate a hypothesis of how {DRUG} can treat Alzheimer's disease in a paragraph."                                                                                                                                                                                             |
| Generating a hypothesis by Consensus without further information ("Consensus")                | "Based on your knowledge, generate a hypothesis of how {DRUG} can treat Alzheimer's disease in a paragraph."                                                                                                                                                                                             |

**Table S5.** The prompt templates for explaining the potential of new ADRD treatments. Replace {DRUG}, {SENTENCE n}, {UNREL\_SENT 1}, {SUBJECT n}, {UNREL\_SUBJECT n}, {RELATION n}, {OBJECT n}, and {UNREL\_OBJECT n} with the candidate drug's name, supporting sentences, unrelated sentences, subject name, unrelated subject name, relation type, object name, and unrelated object name respectively.

| Drug name                | FDA-approved indication | Closest ADRD drug | Correlation | R-score | P-value | First CT for ADRD | Adj PV <sup>0</sup> |
|--------------------------|-------------------------|-------------------|-------------|---------|---------|-------------------|---------------------|
| <b>Levetiracetam</b>     | Seizures                | Memantine         | 0.9928      | 0.7153  | 0.0002  | 09/12/01          | 0.0004              |
| <b>Clomipramine</b>      | Schizophrenia           | Brexpiprazole     | 0.9932      | 0.6824  | 0.0007  | NA                | NA                  |
| <b>Duloxetine</b>        | Depression              | Brexpiprazole     | 0.9893      | 0.6691  | 0.0012  | 03/12/01          | 0.0017              |
| <b>Fluoxetine</b>        | Depression              | Brexpiprazole     | 0.9953      | 0.6976  | 0.0004  | NA                | NA                  |
| <b>Maprotiline</b>       | Depression              | Brexpiprazole     | 0.9924      | 0.6565  | 0.0019  | NA                | NA                  |
| <b>Armodafinil</b>       | Schizophrenia           | Brexpiprazole     | 0.9944      | 0.6338  | 0.0040  | NA                | NA                  |
| <b>Sertraline</b>        | Depression              | Brexpiprazole     | 0.9921      | 0.6808  | 0.0008  | NA                | NA                  |
| <b>Lisdexamfetamine</b>  | ADHD                    | Brexpiprazole     | 0.9922      | 0.6463  | 0.0027  | NA                | NA                  |
| <b>Atomoxetine</b>       | ADHD                    | Brexpiprazole     | 0.9784      | 0.7051  | 0.0003  | 03/10/01          | 0.0033              |
| <b>Dextroamphetamine</b> | ADHD                    | Brexpiprazole     | 0.9957      | 0.6965  | 0.0004  | 03/10/01          | 0.0002              |
| Brexpiprazole            | ADRD                    | Brexpiprazole     | 1.0000      | 0.6827  | 0.0007  | 13/07/11          | NA                  |
| Caffeine                 | Apnea                   | Donepezil         | 0.9860      | 0.6535  | 0.0021  | 06/06/01          | 0.0072              |
| Escitalopram             | Depression              | Brexpiprazole     | 0.9948      | 0.7067  | 0.0003  | 95/09/01          | NA                  |
| Guanfacine               | ADHD                    | Brexpiprazole     | 0.9917      | 0.7124  | 0.0002  | 19/01/04          | 0.0011              |
| Hydralazine              | Hypertension            | Donepezil         | 0.9226      | 0.6134  | 0.0074  | 21/08/02          | 0.0010              |
| Metformin                | Hyperglycemia           | Donepezil         | 0.9076      | 0.6196  | 0.0062  | 08/06/01          | 0.0057              |
| OM3-CA                   | HTG                     | Galantamine       | 0.9457      | 0.5639  | 0.0260  | NA                | NA                  |

**Table S6.** Compared candidate drugs' R-scores for ADRD. Candidate drugs proposed by a previous study are highlighted in bold. \*: date format: YY/MM/DD. Correlation: the Pearson correlation coefficient determined by comparing the drug and its closest ADRD drug, as per the R-score profile. ADHD: attention-deficit/hyperactivity disorder; OM3-CA: omega-3-carboxylic acids; HTG: hypertriglyceridemia.

| Original relation | Normalized relation |
|-------------------|---------------------|
| ADMINISTERED_TO   | TREATS              |
| AFFECTS           | ASSOCIATED_WITH     |
| AUGMENTS          | STIMULATES          |
| DISRUPTS          | INHIBITS            |
| PREVENTS          | INHIBITS            |
| METHOD_OF         | ISA                 |
| USES              | ISA                 |
| LOCATION_OF       | PART_OF             |
| PREDISPOSES       | CAUSES              |

**Table S7.** Relation normalization.

## References

1. Tung, N. T., Derreumaux, P., Vu, V. V., Nam, P. C. & Ngo, S. T. C-terminal plays as the possible nucleation of the self-aggregation of the s-shape  $\alpha\beta$ 11–42 tetramer in solution: Intensive md study. *ACS omega* **4**, 11066–11073 (2019).
2. Prabhakar, R. Computational insights into the development of novel therapeutic strategies for alzheimer's disease. *Futur. medicinal chemistry* **1**, 119–135 (2009).
3. McCarron, M. *et al.* Association between interleukin-1a polymorphism and cerebral amyloid angiopathy–related hemorrhage. *Stroke* **34**, e193–e195 (2003).
4. Himmelhoch, E., Latham, O. & McDONALD, C. Alzheimer's disease complicated by a terminal salmonella infection. *Med. J. Aust.* **1**, 701–703 (1947).
5. Wen, C. *et al.* The secretion from bone marrow mesenchymal stem cells pretreated with berberine rescues neurons with oxidative damage through activation of the keap1-nrf2-ho-1 signaling pathway. *Neurotox. Res.* **38**, 59–73 (2020).
6. Hasegawa, M., Crowther, R. A., Jakes, R. & Goedert, M. Alzheimer-like changes in microtubule-associated protein tau induced by sulfated glycosaminoglycans: inhibition of microtubule binding, stimulation of phosphorylation, and filament assembly depend on the degree of sulfation. *J. biological chemistry* **272**, 33118–33124 (1997).
7. Pirogovsky, E. *et al.* Temporal sequence learning in healthy aging and amnesic mild cognitive impairment. *Exp. aging research* **39**, 371–381 (2013).
8. Zhang, L. *et al.* Biochemical characterization of the  $\gamma$ -secretase activity that produces  $\beta$ -amyloid peptides. *Biochem.* **40**, 5049–5055 (2001).
9. Scott, C. W., Fieles, A., Sygowski, L. A. & Caputo, C. B. Aggregation of tau protein by aluminum. *Brain research* **628**, 77–84 (1993).
10. Lu, X.-Y. *et al.* Metformin ameliorates  $\alpha\beta$  pathology by insulin-degrading enzyme in a transgenic mouse model of alzheimer's disease. *Oxidative Medicine Cell. Longev.* **2020**, 2315106 (2020).
