# Supplementary material for: DrugReX: an explainable drug repurposing system powered by large language models and literature-based knowledge graph
Source: Research Square preprint supplement (doi:10.21203/rs.3.rs-6728958/v1), 2025-06-16
Supplement: Supplementary file 1 [file 687e6b681a24cda184705a22.xlsx]

## Sheet: Data S5
Drug name	NCT Number	Study Title	Study URL	Acronym	Study Status	Brief Summary	Study Results	Conditions	Interventions	Primary Outcome Measures	Secondary Outcome Measures	Other Outcome Measures	Sponsor	Collaborators	Sex	Age	Phases	Enrollment	Funder Type	Study Type	Study Design	Other IDs	Start Date	Primary Completion Date	Completion Date	First Posted	Results First Posted	Last Update Posted	Locations	Study Documents
Latrepirdine	NCT00377715	Double-blind, Placebo-controlled Study of Oral Dimebon in Subjects With Mild to Moderate Alzheimer's Disease	https://clinicaltrials.gov/study/NCT00377715		COMPLETED	This study will evaluate the safety and potential benefit of Dimebon as compared to placebo in patients with mild to moderate Alzheimer's Disease.	NO	Alzheimer's Disease	DRUG: Dimebon|DRUG: Placebo	Alzheimer's Disease Assessment Scale - cognitive subscale, 26 weeks	Clinical Global Impression of Change, 26 weeks|Safety Assessed By Number of Participants With Adverse Events, Adverse events will be assessed through physical examinations, electrocardiograms, and clinical laboratory data (chemistry panel, complete blood count (CBC) with differential, and urinalysis). The incidence of adverse events will be summarized by severity and relationship to study treatme…		Medivation, Inc.		ALL	ADULT, OLDER_ADULT	PHASE2	183	INDUSTRY	INTERVENTIONAL	Allocation: RANDOMIZED|Intervention Model: PARALLEL|Masking: QUADRUPLE (PARTICIPANT, CARE_PROVIDER, INVESTIGATOR, OUTCOMES_ASSESSOR)|Primary Purpose: TREATMENT	DIM02	2005-09-01	2006-08-01		2006-09-18		2015-11-11	Mental Health Research Center of Russian Academy of Medical Sciences, Moscow, Russian Federation
Latrepirdine	NCT00675623	A Safety and Efficacy Study of Oral Dimebon in Patients With Mild-To-Moderate Alzheimer's Disease	https://clinicaltrials.gov/study/NCT00675623	CONNECTION	COMPLETED	The Connection Study is a six-month confirmatory Phase 3 study to determine the safety and efficacy of Dimebon in the treatment of mild-to-moderate Alzheimer's disease (AD).	NO	Alzheimer's Disease	DRUG: Dimebon|DRUG: Dimebon|DRUG: Placebo	To determine the effect of Dimebon as compared to placebo on the primary measure of cognition and memory, the Alzheimer's Disease Assessment Scale-cognitive subscale (ADAS-cog)., Week 26|To determine the effect of Dimebon as compared to placebo on the primary measure of global function, the Clinician's Interview-Based Impression of Change Plus Caregiver Input (CIBIC-plus)., Week 26	To determine the effect of Dimebon as compared to placebo on a measure of self care and daily function, the Alzheimer's Disease Cooperative Study Activities of Daily Living (ADCS-ADL)., Week 26|To determine the effect of Dimebon as compared to placebo on a measure of behavior, the Neuropsychiatric Inventory (NPI)., Week 26		Medivation, Inc.		ALL	ADULT, OLDER_ADULT	PHASE3	598	INDUSTRY	INTERVENTIONAL	Allocation: RANDOMIZED|Intervention Model: PARALLEL|Masking: QUADRUPLE (PARTICIPANT, CARE_PROVIDER, INVESTIGATOR, OUTCOMES_ASSESSOR)|Primary Purpose: TREATMENT	CONNECTION|DIM14	2008-05-01	2009-12-01		2008-05-09		2016-09-27	Phoenix, Arizona, 85004, United States|Costa Mesa, California, United States|Fresno, California, 93720, United States|Rancho Mirage, California, United States|Hamden,, Connecticut, United States|New Haven, Connecticut, United States|Norwalk, Connecticut, United States|Hallandale Beach, Florida, 33009, United States|Hialeah, Florida, United States|Miami, Florida, 33137, United States|North Miami, …
Latrepirdine	NCT00704782	Study of Combination Therapy With Dimebon and Donepezil (Aricept) in Patients With Alzheimer's Disease	https://clinicaltrials.gov/study/NCT00704782		TERMINATED	The purpose of this study is to assess the safety and efficacy of Dimebon in combination with donepezil (Aricept) in the treatment of Alzheimer's disease.	NO	Alzheimer's Disease	DRUG: dimebon	To assess the safety of Dimebon in combination with donepezil (Aricept), week 6, 9, 12, 26 and every 13 weeks thereafter until study discontinuation			Medivation, Inc.		ALL	ADULT, OLDER_ADULT	PHASE2	50	INDUSTRY	INTERVENTIONAL	Allocation: NA|Intervention Model: SINGLE_GROUP|Masking: NONE|Primary Purpose: TREATMENT	DIM13	2008-04-01	2010-08-01	2010-08-01	2008-06-25		2015-12-10	Xenoscience, Inc., Phoenix, Arizona, 85004, United States|Banner Alzheimer's Institute, Phoenix, Arizona, 85006, United States|Barrow Neurological Institute, Phoenix, Arizona, 85013, United States|Sun Health Research Institute, Sun City, Arizona, 85351, United States
Latrepirdine	NCT00824590	A Phase 1, Non-Randomized, Open-Label, Single-Dose Study To Evaluate The Pharmacokinetics, Safety, And Tolerability Of Dimebon [PF 01913539] In Subjects With Severely-Impaired And Normal Renal Function	https://clinicaltrials.gov/study/NCT00824590		COMPLETED	This study is to compare the pharmacokinetics of Dimebon in subjects with severe renal impairment to subjects with normal renal function after oral administration of a single oral 20-mg dose of Dimebon. This study is also to assess the safety and tolerability of a single oral 20-mg dose of Dimebon in subjects with severe renal impairment and subjects with normal renal function.	NO	Alzheimer's Disease|Huntington's Disease	DRUG: Dimebon|DRUG: Dimebon	Plasma drug concentrations, 96	Safety assessment including physical/neurological examination findings, clinical safety laboratory assessments, 12-lead ECGs, vital sign measurements, and adverse event monitoring., 96		Pfizer	Medivation, Inc.	ALL	ADULT, OLDER_ADULT	PHASE1	20	INDUSTRY	INTERVENTIONAL	Allocation: NON_RANDOMIZED|Intervention Model: PARALLEL|Masking: NONE|Primary Purpose: TREATMENT	B1451019	2009-02-01	2009-10-01	2009-10-01	2009-01-19		2009-12-30	Pfizer Investigational Site, Miami, Florida, 33169, United States|Pfizer Investigational Site, St. Paul, Minnesota, 55114, United States
Latrepirdine	NCT00825084	A Phase 1 Study To Evaluate The Pharmacokinetics, Safety, And Tolerability Of Dimebon [PF-01913539] In Japanese And Western Healthy Subjects	https://clinicaltrials.gov/study/NCT00825084		COMPLETED	This study is to characterize the pharmacokinetics of single and multiple oral doses of Dimebon in Japanese healthy subjects. This study is also to evaluate the safety and tolerability of single and multiple oral doses of Dimebon in Japanese healthy subjects. The secondary objective of this study is to compare the pharmacokinetics, safety and tolerability of single and multiple oral doses of Dime…	NO	Alzheimer's Disease|Huntington's Disease	DRUG: Dimebon|DRUG: Dimebon|DRUG: Dimebon|DRUG: Dimebon	plasma drug concentrations, 72 hours post last dose	Safety will be including physical/neurological examination findings, clinical safety laboratory assessments, 12-lead ECGs, vital sign measurements and adverse event monitoring, 72 hours post last dose		Pfizer	Medivation, Inc.	ALL	ADULT	PHASE1	45	INDUSTRY	INTERVENTIONAL	Allocation: RANDOMIZED|Intervention Model: PARALLEL|Masking: DOUBLE (PARTICIPANT, INVESTIGATOR)|Primary Purpose: TREATMENT	B1451014	2009-02-01	2009-05-01	2009-05-01	2009-01-19		2011-04-26	Pfizer Investigational Site, Glendale, California, 91206, United States
Latrepirdine	NCT00827034	A Phase 1, Randomized, Open-Label, Two-Way Crossover Study To Evaluate The Steady-State Effect Of Dimebon (PF 01913539) On The Single-Dose Pharmacokinetics And Pharmacodynamics Of Warfarin In Healthy Subjects	https://clinicaltrials.gov/study/NCT00827034		COMPLETED	This study will evaluate the potential drug-drug interaction of Dimebon with the FDA-recommended CYP2C9 substrate warfarin in healthy subjects. Conformance with the guidance includes general study design using a randomized, open label, single-dose warfarin, steady-state Dimebon, 2-sequence, 2-treatment, 2-period crossover design with a minimum 7-day washout period between treatments.	NO	Alzheimer's Disease|Huntington's Disease	DRUG: Warfarin|DRUG: Dimebon|DRUG: Warfarin	Single dose pharmacokinetics (Cmax, AUCinf) of warfarin 25 mg with and without co-administration of steady-state Dimebon 20 mg TID in healthy adult subjects., 7+18 days|Single dose pharmacodynamics (INRmax, AUC-INR) of warfarin 25 mg with and without co-administration of steady-state Dimebon 20 mg TID in healthy adult subjects., 7+18 days|Safety and tolerability ( adverse event monitoring, physic…			Pfizer	Medivation, Inc.	ALL	ADULT	PHASE1	14	INDUSTRY	INTERVENTIONAL	Allocation: RANDOMIZED|Intervention Model: CROSSOVER|Masking: NONE|Primary Purpose: TREATMENT	B1451020	2009-02-01	2009-04-01	2009-04-01	2009-01-22		2018-10-16	Pfizer Investigational Site, New Haven, Connecticut, 06511, United States
Latrepirdine	NCT00829374	Safety and Efficacy Study Evaluating Dimebon in Patients With Mild to Moderate Alzheimer's Disease on Donepezil	https://clinicaltrials.gov/study/NCT00829374	CONCERT	COMPLETED	The purpose of this study is to determine if Dimebon is safe and effective in patients with mild to moderate Alzheimer's disease on Donepezil.	NO	Alzheimer's Disease	DRUG: Dimebon|DRUG: Dimebon|DRUG: Placebo comparator	Alzheimer's Disease Cooperative Study - Activities of Daily Living (ADCS-ADL), Week 52|Alzheimer's Disease Assessment Scale - Cognitive Subscale, Week 52	Clinician's Interview Based Impression of Change, plus caregiver input (CIBIC-plus), Week 52|Neuropsychiatric Inventory (NPI), Week 52|Resource Utilization in Dementia Lite (RUD lite), Week 52|Euro Quality of Life 5 (EQ-5D), Week 52		Medivation, Inc.	Pfizer	ALL	ADULT, OLDER_ADULT	PHASE3	1003	INDUSTRY	INTERVENTIONAL	Allocation: RANDOMIZED|Intervention Model: PARALLEL|Masking: TRIPLE (PARTICIPANT, CARE_PROVIDER, INVESTIGATOR)|Primary Purpose: TREATMENT	DIM18	2009-03-01	2011-12-01	2011-12-01	2009-01-27		2016-09-27	Phoenix, Arizona, 85006, United States|Sun City, Arizona, 85351, United States|Tucson, Arizona, 85724, United States|Costa Mesa, California, 92626, United States|Encino, California, 91316, United States|Escondido, California, 92025, United States|Fresno, California, 93720, United States|Garden Grove, California, 92845, United States|La Jolla, California, 92037, United States|Los Alamitos, Califor…
Latrepirdine	NCT00829816	Safety and Tolerability of Dimebon in Patients on Memantine, and Memantine Plus Donepezil	https://clinicaltrials.gov/study/NCT00829816		COMPLETED	The purpose of this study is to evaluate the safety and tolerability of dimebon given to Alzheimer's disease patients currently on a stable dose and regimen of memantine or memantine plus donepezil.	NO	Alzheimer's Disease	DRUG: Dimebon|DRUG: Placebo	To assess the safety and tolerability of orally administered dimebon in patients with Alzheimer's disease (AD) on a stable dose and regimen of memantine, or memantine plus donepezil., Treatment discontinuation due to adverse events, the frequency and severity of adverse events, and clinically significant changes in safety assessments (including physical examination findings, vital signs, laborato…	To assess the steady-state pharmacokinetics (PK) of orally-administered dimebon in patients with AD on a stable dose and regimen of memantine, or memantine plus donepezil., The following key parameters will be used to assess the steady-state PK of dimebon: maximum plasma concentration (Cmax), time to maximum plasma concentration (tmax), Ctrough, area under the curve (AUC), and peak-to-trough rati…		Medivation, Inc.		ALL	ADULT, OLDER_ADULT	PHASE1	46	INDUSTRY	INTERVENTIONAL	Allocation: RANDOMIZED|Intervention Model: PARALLEL|Masking: QUADRUPLE (PARTICIPANT, CARE_PROVIDER, INVESTIGATOR, OUTCOMES_ASSESSOR)|Primary Purpose: TREATMENT	DIM17	2008-12-01	2009-04-01	2010-08-01	2009-01-27		2015-11-10	Los Alamitos, California, 90720, United States|National City, California, 91950, United States|Delray Beach, Florida, 33445, United States|Orlando, Florida, 32806, United States
Latrepirdine	NCT00831506	Dimebon (PF-01913539)-Digoxin Drug-Drug Interaction Study In Healthy Subjects	https://clinicaltrials.gov/study/NCT00831506		COMPLETED	This study has been designed to confirm, in healthy subjects, the lack of a clinically important pharmacokinetic interaction between Dimebon, at the proposed maximum commercial dose of 20 mg TID (administered every 8 hours), and digoxin (Lanoxin®) 0.125 mg QD, a sensitive P-gp substrate recommended by FDA.	NO	Alzheimer Disease|Huntington Disease	DRUG: digoxin|DRUG: digoxin|DRUG: dimebon	AUC24 and Cmin of digoxin on Day 14, Day 14	Cmax, Tmax, Ae, and renal clearance of digoxin on Day 14, Day 14|Adverse event monitoring through Day 14 including physical/neurological examination findings, Day 14|Clinical safety assessments through Day 14 including chemistry, hematology, and vital signs, Day 14|12-lead ECGs through Day 14, Day 14		Pfizer	Medivation, Inc.	ALL	ADULT	PHASE1	12	INDUSTRY	INTERVENTIONAL	Allocation: RANDOMIZED|Intervention Model: CROSSOVER|Masking: QUADRUPLE (PARTICIPANT, CARE_PROVIDER, INVESTIGATOR, OUTCOMES_ASSESSOR)|Primary Purpose: TREATMENT	B1451021	2009-02-01	2009-05-01	2009-05-01	2009-01-29		2009-06-12	Pfizer Investigational Site, New Haven, Connecticut, 06511, United States
Latrepirdine	NCT00838110	A Phase 3 Study To Evaluate The Safety And Tolerability Of Dimebon Patients With Mild To Moderate Alzheimer's Disease	https://clinicaltrials.gov/study/NCT00838110		COMPLETED	This is a multi-center, randomized, double-blind placebo-controlled safety study conducted in 2 study cohorts. In Cohort 1, subjects with Alzheimer's disease (n=250) will receive Dimebon 20 mg or placebo TID for 26 weeks. In Cohort 2 AD subjects (n=500) will be treated with Dimebon 20 mg or placebo TID for 12 weeks After completion of the randomized portion of the study, subjects in both Cohorts …	YES	Alzheimer's Disease	DRUG: Dimebon|DRUG: Placebo|DRUG: Dimebon|DRUG: Placebo	Percentage of Participants With Abnormal Clinically Significant Vital Signs in Cohort 1, Abnormal clinically significant vital signs included absolute systolic blood pressure (BP) values: less than (\<) 90 millimeter of mercury (mmHg), maximum increase or decrease of greater than or equal to (\>=) 30 mmHg from baseline; absolute diastolic BP value: \<50 mmHg, maximum increase or decrease of \>=20…			Pfizer	Medivation, Inc.	ALL	ADULT, OLDER_ADULT	PHASE3	742	INDUSTRY	INTERVENTIONAL	Allocation: RANDOMIZED|Intervention Model: PARALLEL|Masking: TRIPLE (PARTICIPANT, CARE_PROVIDER, INVESTIGATOR)|Primary Purpose: TREATMENT	B1451027	2009-02-01	2010-01-01	2010-01-01	2009-02-06	2012-10-11	2018-12-06	Pfizer Investigational Site, Mobile, Alabama, 36608, United States|Pfizer Investigational Site, Northport, Alabama, 35476, United States|Pfizer Investigational Site, Little Rock, Arkansas, 72205, United States|Pfizer Investigational Site, Oceanside, California, 92056, United States|Pfizer Investigational Site, San Diego, California, 92123, United States|Pfizer Investigational Site, Santa Rosa, Ca…
Latrepirdine	NCT00912288	A Phase 3 Efficacy Study Of Dimebon In Patients With Moderate To Severe Alzheimer's Disease	https://clinicaltrials.gov/study/NCT00912288		TERMINATED	No Dimebon clinical data exist yet in patients with disease that has advanced to the moderate-to-severe stage. Therefore, this study evaluates the safety and efficacy of Dimebon in patients with moderate-to-severe AD who are receiving existing background therapy with memantine.	YES	Alzheimer Disease	DRUG: Dimebon 20 mg po TID|DRUG: Placebo po TID	Change From Baseline in the Severe Impairment Battery (SIB) Score at Week 26, SIB developed for evaluation of cognitive function in participants, who demented to a degree that they cannot complete conventional neuropsychological testing. Test items consisted of simple, one-step commands presented with gestural cues and instructions that were repeated if necessary. SIB test consisted of 51-item sc…	Change From Baseline in the Neuropsychiatric Inventory (NPI) Total Score at Week 26, NPI:12-domain caregiver assessment of behavioral disturbances occurring in dementia: delusions, hallucinations, agitation/aggression, depression/dysphoria, anxiety, elation/euphoria, apathy/indifference, disinhibition, irritability/lability, motor disturbance, appetite/eating, nighttime behavior. Severity(1=Mild …		Pfizer	Medivation, Inc.	ALL	ADULT, OLDER_ADULT	PHASE3	86	INDUSTRY	INTERVENTIONAL	Allocation: RANDOMIZED|Intervention Model: PARALLEL|Masking: TRIPLE (PARTICIPANT, CARE_PROVIDER, INVESTIGATOR)|Primary Purpose: TREATMENT	B1451006	2009-09-01	2010-08-01	2010-08-01	2009-06-03	2012-07-30	2012-10-02	Pfizer Investigational Site, Phoenix, Arizona, 85006, United States|Pfizer Investigational Site, Costa Mesa, California, 92626, United States|Pfizer Investigational Site, Encino, California, 91316, United States|Pfizer Investigational Site, Los Alamitos, California, 90720, United States|Pfizer Investigational Site, Newport Beach, California, 92660-2452, United States|Pfizer Investigational Site, …
Latrepirdine	NCT00931073	A Phase I Study To Estimate The Effect Of Ketoconazole And Omeprazole On The Pharmacokinetics Of Dimebon In Healthy Subjects Who Are Normal Or Poor CYP2D6 Metabolizers	https://clinicaltrials.gov/study/NCT00931073		COMPLETED	This study will evaluate the potential for a drug-drug interaction of Dimebon with ketoconazole and omeprazole, potent inhibitors of the drug metabolizing enzymes CYP3A4 and CYP2C19, respectively.	NO	Alzheimer's Disease|Huntington's Disease	DRUG: Dimebon alone|DRUG: Dimebon + Ketoconazole|DRUG: Dimebon + Omeprazole	Dimebon alone: Dimebon PK in CYP2D6 EMs and PMs (Cmax, Tmax, AUCinf (as data permit), AUClast, and t1/2 (as data permit), CL/F (as data permit) and V/F (as data permit)), Period 1 Day 1|Dimebon + keto: Dimebon PK in CYP2D6 EMs and PMs (Cmax, Tmax, AUCinf (as data permit), AUClast, and t1/2 (as data permit), CL/F (as data permit) and V/F (as data permit)), Period 2 Day 4|Dimebon + omeprazole: Dime…	Dimebon alone: Safety and tolerability (AE's, ECG, vital signs, safety labs), Period 1 Day 1-7|Dimebon + keto: Safety and tolerability (AE's, ECG, vital signs, safety labs), Period 2 Day 1-12|Dimebon + omeprazole: Safety and tolerability (AE's, ECG, vital signs, safety labs), Period 3 Day 1-13		Pfizer	Medivation, Inc.	ALL	ADULT	PHASE1	24	INDUSTRY	INTERVENTIONAL	Allocation: NON_RANDOMIZED|Intervention Model: CROSSOVER|Masking: NONE|Primary Purpose:	B1451017	2009-07-01	2009-10-01	2009-10-01	2009-07-02		2009-11-18	Pfizer Investigational Site, Kalamazoo, Michigan, 49007, United States
Latrepirdine	NCT00939783	An Extension To The B1451027 Protocol To Evaluate The Long Term Safety And Tolerability Of Dimebon In Patients With Alzheimer's Disease	https://clinicaltrials.gov/study/NCT00939783		TERMINATED	The purpose of this study is to evaluate the long-term safety and tolerability of Dimebon in patients with Alzheimer's disease.	YES	Alzheimer's Disease	DRUG: Dimebon	Percentage of Participants With Adverse Events (AEs), An AE was any untoward medical occurrence in a participant who received study drug without regard to possibility of causal relationship., Baseline up to Week 65 (end of treatment)	Percentage of Participants With Abnormal Clinically Significant Vital Signs, Abnormal clinically significant vital signs included absolute systolic blood pressure (BP) values less than (\<) 90 millimeter of mercury (mmHg), maximum increase or decrease of greater than or equal to (\>=) 30 mmHg from baseline for systolic BP; absolute diastolic BP \<50 mmHg with maximum increase or decrease of \>=20…		Pfizer	Medivation, Inc.	ALL	ADULT, OLDER_ADULT	PHASE3	649	INDUSTRY	INTERVENTIONAL	Allocation: NON_RANDOMIZED|Intervention Model: SINGLE_GROUP|Masking: NONE|Primary Purpose: TREATMENT	B1451029	2009-09-01	2010-08-01	2010-08-01	2009-07-15	2012-10-11	2012-11-14	Pfizer Investigational Site, Mobile, Alabama, 36608, United States|Pfizer Investigational Site, Northport, Alabama, 35476, United States|Pfizer Investigational Site, Little Rock, Arkansas, 72205, United States|Pfizer Investigational Site, Oceanside, California, 92056, United States|Pfizer Investigational Site, San Diego, California, 92123, United States|Pfizer Investigational Site, Santa Rosa, Ca…
Latrepirdine	NCT00954590	A Safety and Efficacy Study Evaluating Dimebon (Latrepirdine) in Patients With Moderate to Severe Alzheimer's Disease	https://clinicaltrials.gov/study/NCT00954590	CONTACT	TERMINATED	The purpose of this study is to determine if Dimebon is safe and effective in patients with moderate to severe Alzheimer's disease.	NO	Moderate to Severe Alzheimer	DRUG: Dimebon (latrepirdine)|DRUG: Placebo	Neuropsychiatric Inventory (NPI), To evaluate the efficacy of dimebon (latrepirdine) as compared to placebo on a measure of behavior, the Neuropsychiatric Inventory (NPI), 26 weeks post baseline|Activities of Daily Living (severe) (ADCS ADLsev), To evaluate the efficacy of dimebon as compared to placebo on a measure of self-care and daily function, the Alzheimer's Disease Cooperative Study - Acti…			Medivation, Inc.	Pfizer	ALL	ADULT, OLDER_ADULT	PHASE3	89	INDUSTRY	INTERVENTIONAL	Allocation: RANDOMIZED|Intervention Model: PARALLEL|Masking: TRIPLE (PARTICIPANT, CARE_PROVIDER, INVESTIGATOR)|Primary Purpose: TREATMENT	DIM19	2009-10-01	2010-08-01		2009-08-07		2016-09-27	Santiago, Chile|Glasgow, Scotland, United Kingdom
Latrepirdine	NCT00975481	A Study To Evaluate The Abuse Potential Of Single Oral Doses Of Dimebon (Latrepirdine) In Healthy Recreational Polydrug Users	https://clinicaltrials.gov/study/NCT00975481		COMPLETED	Dimebon will not exhibit abuse potential when compared to placebo or a positive control (alprazolam).	YES	Alzheimer's Disease|Huntington's Disease	DRUG: dimebon|DRUG: dimebon|DRUG: dimebon|DRUG: placebo|DRUG: alprazolam|DRUG: alprazolam	Balance of Effects- Drug Liking VAS: Peak Effect (Maximum Effect [Emax]) and Minimum Effect (Emin), Drug liking VAS is one of the measures of balance of effects that assesses the degree that a participant likes a drug effect at the time the question is being asked (that is, at the moment). It is scored using a 100 millimeter (mm) bipolar visual analogue scale (VAS) anchored in the center with a n…			Pfizer	Medivation, Inc.	ALL	ADULT	PHASE1	36	INDUSTRY	INTERVENTIONAL	Allocation: RANDOMIZED|Intervention Model: CROSSOVER|Masking: DOUBLE (PARTICIPANT, INVESTIGATOR)|Primary Purpose:	B1451037	2009-10-01	2010-02-01	2010-02-01	2009-09-11	2012-12-03	2013-04-02
Latrepirdine	NCT00988624	A Study In Healthy Volunteers To Estimate The Pharmacokinetics Of Four Modified-Release Formulations Of Dimebon (Latrepirdine)	https://clinicaltrials.gov/study/NCT00988624		COMPLETED	This study will evaluate four different modified release formulation to estimate the amount of dimebon available to the body relative to the current dimebon formulation that is given three times a day. The results of this study will help inform and guide further formulation development efforts with the ultimate goal of reducing dose frequency to once-a-day or twice-a-day.	NO	Alzheimer's Disease|Huntington Disease	DRUG: Dimebon IR Tablet|DRUG: Dimebon MR1|DRUG: Dimebon MR2|DRUG: Dimebon MR3|DRUG: Dimebon MR4	PK endpoints for dimebon and M7 (where appropriate) for each formulation: AUC0-24, AUC0-24(dn), AUCinf (as data permit) AUCinf(dn), AUClast, AUClast(dn), Tlag, Cmax, Tmax, and t1/2 (as data permit)., Day 1-3 of Period 1, 2, 3, 4, or 5	Safety and tolerability for each formulation (AEs, ECG, vital signs, safety labs), Day 1-3 of Period 1, 2, 3, 4, or 5		Pfizer	Medivation, Inc.	ALL	ADULT	PHASE1	20	INDUSTRY	INTERVENTIONAL	Allocation: RANDOMIZED|Intervention Model: CROSSOVER|Masking: NONE|Primary Purpose:	B1451023	2009-10-01	2009-12-01	2009-12-01	2009-10-02		2010-01-12	Pfizer Investigational Site, New Haven, Connecticut, 06511, United States
Latrepirdine	NCT00990613	A Study Evaluating The Absorption Of Dimebon Into The Body From A Dimebon Solution Applied To The Skin	https://clinicaltrials.gov/study/NCT00990613		COMPLETED	To estimate the absorption, safety, and tolerability of a dimebon transdermal solution relative to the dimebon immediate release oral formulation.	NO	Alzheimer's Disease|Huntington's Disease	DRUG: Dimebon IR|DRUG: Dimebon Transdermal|DRUG: Dimebon Transdermal|DRUG: Dimebon IR|DRUG: Dimebon Transdermal	Pharmacokinetic endpoints include dimebon area under the curve from 0 to the last quantifiable concentration (AUClast) and dimebon area under the curve from 0 to infinity (AUCinf) as permitted by data, 4 to 6 days	Safety endpoints include subjective symptoms/objective findings (including skin irritation), clinical safety laboratory assessments, 12 lead ECGs, and supine vital signs., 4 to 6 days		Pfizer	Medivation, Inc.	ALL	ADULT, OLDER_ADULT	PHASE1	19	INDUSTRY	INTERVENTIONAL	Allocation: RANDOMIZED|Intervention Model: CROSSOVER|Masking: DOUBLE (PARTICIPANT, INVESTIGATOR)|Primary Purpose:	B1451038	2009-10-01	2010-01-01	2010-01-01	2009-10-07		2010-02-03	Pfizer Investigational Site, Kalamazoo, Michigan, 49007, United States
Latrepirdine	NCT01066481	A Study Of Oral PF-01913539 In Patients With Mild To Moderate Alzheimer's Disease	https://clinicaltrials.gov/study/NCT01066481		WITHDRAWN	The purpose of this study is to demonstrate the safety and efficacy of PF-01913539 in the treatment of patients with mild-to-moderate Alzheimer's Disease. It is a 6-month study enrolling 651 patients in Japan, Hong Kong, Korea, and Republic of China. All patients completing the 6-month study will be eligible to receive PF-01913539 in an open-label extension trial (B1451031).	NO	Alzheimer's Disease|Dementia|Dimebon|Investigational Drug	DRUG: PF-01913539 5 mg|DRUG: PF-01913539 5 mg|DRUG: Placebo	Mean change in the Alzheimer's Disease Assessment Scale Cognitive Subscale (ADAS-cog) score from baseline., 26 weeks|Distribution of Clinician's Interview-Based Impression of Change plus Caregiver (CIBIC-plus) Input, 26 weeks	Mean change in Alzheimer's Disease Cooperative Study - Activities of Daily Living (ADAS-ADL) score from baseline., 12, 26 weeks|Mean change in Neuropsychiatric Inventory (NPI) score from baseline., 12, 26 weeks|Mean change in Mini-Mental State Examination (MMSE) score from baseline., 6, 12, 18, 26 weeks|Mean change in each item of Resource Utilization In Dementia(RUD) Lite from baseline., 12, 26 …		Pfizer		ALL	ADULT, OLDER_ADULT	PHASE2	0	INDUSTRY	INTERVENTIONAL	Allocation: RANDOMIZED|Intervention Model: PARALLEL|Masking: TRIPLE (PARTICIPANT, CARE_PROVIDER, INVESTIGATOR)|Primary Purpose: TREATMENT	B1451010	2010-04-01	2012-03-01	2012-04-01	2010-02-10		2010-06-29
Latrepirdine	NCT01066546	An Extension To The B1451006 Protocol To Evaluate The Safety and Efficacy of Dimebon In Subjects With Moderate-to-Severe Alzheimer's Disease	https://clinicaltrials.gov/study/NCT01066546		TERMINATED	The purpose of this study is to evaluate the long-term safety and tolerability of dimebon in subjects with moderate-to-severe Alzheimer's Disease.	YES	Alzheimer's Disease	DRUG: Dimebon tablet for oral administration	Number of Participants With Adverse Events (AEs), An adverse event is any untoward medical occurrence in a participant who received study drug without regard to possibility of causal relationship., Baseline up to 4 weeks after last dose of study treatment	Change From Baseline in Severe Impairment Battery (SIB) at Week 6, 12 and 26, SIB developed for evaluation of cognitive function in participants, who demented to a degree that they cannot complete conventional neuropsychological testing. Test items consisted of simple, one-step commands presented with gestural cues and instructions that were repeated if necessary. SIB test consisted of 51-item sc…		Pfizer	Medivation, Inc.	ALL	ADULT, OLDER_ADULT	PHASE3	5	INDUSTRY	INTERVENTIONAL	Allocation: NON_RANDOMIZED|Intervention Model: SINGLE_GROUP|Masking: NONE|Primary Purpose: TREATMENT	B1451030	2010-04-01	2010-07-01	2010-07-01	2010-02-10	2012-07-30	2012-10-02	Pfizer Investigational Site, Costa Mesa, California, 92626, United States|Pfizer Investigational Site, Encino, California, 91316, United States|Pfizer Investigational Site, Los Alamitos, California, 90720, United States|Pfizer Investigational Site, Newport Beach, California, 92660-2452, United States|Pfizer Investigational Site, Delray Beach, Florida, 33445, United States
Latrepirdine	NCT01152216	An Extension of the CONCERT Protocol (DIM18)	https://clinicaltrials.gov/study/NCT01152216	CONCERT PLUS	TERMINATED	An open-label extension study of the CONCERT (DIM18) protocol evaluating the safety of dimebon (latrepirdine) in subjects with With Mild-to-Moderate Alzheimer's Disease on Donepezil.	NO	Alzheimer's Disease	DRUG: Dimebon	Safety, To evaluate the long-term safety and tolerability of dimebon (latrepirdine) in Alzheimer's disease (AD) patients who have completed 52 weeks of blinded treatment in the DIM18 (CONCERT) protocol., Through study discontinuation			Medivation, Inc.	Pfizer	ALL	ADULT, OLDER_ADULT	PHASE3	672	INDUSTRY	INTERVENTIONAL	Allocation: NA|Intervention Model: SINGLE_GROUP|Masking: NONE|Primary Purpose: TREATMENT	DIM18EXT	2010-04-01	2012-05-01		2010-06-29		2016-09-27
Latrepirdine	NCT06292351	DMB-I in the Treatment of Alzheimer Type Dementia	https://clinicaltrials.gov/study/NCT06292351		RECRUITING	The purpose of this study is to assess the efficacy and safety of DMB-I for the treatment of patients with Alzheimer type dementia.	NO	Alzheimer Disease|Dementia of Alzheimer Type	DRUG: DMB-I (Dimebon)|OTHER: Placebo	Mean change in Alzheimer's Disease Assessment Scale score after 26 weeks of therapy (Visit 6) compared to baseline (Visit 0) in patients receiving the study drug or placebo, The scale's minimum score - 0, maximum score - 82, where the higher score means the worse outcome, Baseline (Visit 0) and 26 weeks (Visit 6)	Mean change in cognitive impairment score on the Alzheimer's Disease Assessment Scale after 12 weeks of therapy compared to baseline, The scale's minimum score - 0, maximum score - 82, where the higher score means the worse outcome, Baseline (Visit 1) and 12 weeks of therapy (Visit 4)|Mean change in Mini-Mental State Examination score after 12 weeks of therapy (Visit 4) and after 26 weeks of ther…		Bigespas LTD		ALL	ADULT, OLDER_ADULT	PHASE2|PHASE3	135	INDUSTRY	INTERVENTIONAL	Allocation: RANDOMIZED|Intervention Model: PARALLEL|Masking: DOUBLE (PARTICIPANT, INVESTIGATOR)|Primary Purpose: TREATMENT	DMBN_ALZH-2022-II	2023-12-27	2024-12-21	2024-12-21	2024-03-05		2024-03-06	State autonomous healthcare institution "Transregional Clinical Diagnostic Center", Kazan, 420101, Russian Federation|Federal State Budgetary Institution "Federal center for brain and neurotechnologies" of the Federal Medical and Biological Agency (FSBI "FCBN" of Russia's FMBA), Moscow, 117997, Russian Federation|Federal State Autonomous Educational Institution of Higher Education I.M. Sechenov F…
Lithium	NCT00088387	Effect of Lithium and Divalproex in Alzheimer's Disease	https://clinicaltrials.gov/study/NCT00088387		COMPLETED	This study will examine the effect of the drugs lithium and divalproex (Depakote) on tau proteins, a type of protein in the brain and spinal fluid that are altered in patients with Alzheimer's disease. Both drugs are approved by the Food and Drug Administration to treat mood disorders, and both have been shown in animal studies to decrease the amount of altered tau protein. This study will determ…	NO	Alzheimer Disease	DRUG: Divalproex|DRUG: Lithium				National Institute of Neurological Disorders and Stroke (NINDS)		ALL	CHILD, ADULT, OLDER_ADULT	PHASE2	35	NIH	INTERVENTIONAL	Allocation: |Intervention Model: |Masking: |Primary Purpose: TREATMENT	040243|04-N-0243	2004-07-01		2005-03-01	2004-07-26		2008-03-04	National Institute of Neurological Disorders and Stroke (NINDS), Bethesda, Maryland, 20892, United States
Lithium	NCT01055392	Disease-modifying Properties of Lithium in the Neurobiology of Alzheimer's Disease	https://clinicaltrials.gov/study/NCT01055392		UNKNOWN	Lithium salts have been used for the treatment of psychiatric disorders for over five decades, mostly as a mood-stabilizing drug. Recent evidence points to the inhibition of the enzyme glycogen synthase kinase-3beta (GSK3) as one of its mechanisms of action. The overactivity of this enzyme has been implicated in the pathogenesis of Alzheimer's disease (AD), given its involvement in mechanisms rel…	NO	Cognitive Impairment|Alzheimer Disease	DRUG: Lithium Carbonate|DRUG: Placebo	effect of lithium to delay progression of cognitive deficits in patients with amnestic MCI, two year	effect of lithium on CSF levels of Total Tau, Phosphorylated Tau and Amyloid-beta42, one year|the effect of lithium on the activity of GSK3帣 in platelets and leukocytes drawn from peripheral blood., one year		University of Sao Paulo		ALL	ADULT, OLDER_ADULT	PHASE2	80	OTHER	INTERVENTIONAL	Allocation: RANDOMIZED|Intervention Model: PARALLEL|Masking: QUADRUPLE (PARTICIPANT, CARE_PROVIDER, INVESTIGATOR, OUTCOMES_ASSESSOR)|Primary Purpose: PREVENTION	OVForlenza-Lithium|554535/2005-0	2007-03-01	2009-03-01		2010-01-25		2010-01-25	Institute of Psychiatry, Faculty of Medicine - University of Sao Paulo, Sao Paulo, SP, 05403-010, Brazil
Lithium	NCT02129348	Treatment of Psychosis and Agitation in Alzheimer's Disease	https://clinicaltrials.gov/study/NCT02129348		COMPLETED	Clinically, many patients with AD show no response or minimal response to antipsychotics for symptoms of agitation/aggression or psychosis, or they have intolerable side effects on these medications. Antipsychotics have a wide range of side effects, including the risk of increased mortality (60-70% higher rate of death on antipsychotic compared to placebo) that led to an FDA black box warning for…	YES	Alzheimer's Disease|Psychosis|Agitation	DRUG: Lithium|DRUG: Placebo	Change in Neuropsychiatric Inventory (NPI) Agitation/Aggression Domain Score, Neuropsychiatric Inventory (NPI) Agitation/Aggression Domain is the measure used that combines symptoms of agitation and aggression. Frequency X Severity rating score, range 0-12. Higher score indicates more agitation and aggressive behavior., Assessed at screening, Week 0, Week 2, Week 4, Week 6, Week 8, Week 10, Week …	Clinical Responder Defined as a 30% Decrease in NPI Core Score (Sum Score of NPI Domains of Agitation/Aggression, Delusions and Hallucinations) Together With a Clinical Global Impression (CGI) Behavior Change Score of 1 or 2, The patient is classified as a responder (score=1) if both criteria are met or as a non-responder (score=0) if both criteria are not met. The first criterion to determine re…	Folstein Mini-Mental Status Exam, 30 item questionnaire used to assess degree of cognitive impairment. Orientation, registration, attention/calculation, recall, language, repetitions and commands are assessed. Total score is the measure used; range 0-30, higher scores indicate better global cognitive function., Assessed at Screening, Week 12|Severe Impairment Battery, Neuropsychological test used…	New York State Psychiatric Institute	National Institute on Aging (NIA)	ALL	CHILD, ADULT, OLDER_ADULT	PHASE2	77	OTHER	INTERVENTIONAL	Allocation: RANDOMIZED|Intervention Model: PARALLEL|Masking: TRIPLE (PARTICIPANT, CARE_PROVIDER, INVESTIGATOR)|Primary Purpose: TREATMENT	#6915|1R01AG047146-01	2014-06-01	2020-01-01	2020-01-01	2014-05-02	2021-03-18	2024-01-10	University of Miami Miller School of Medicine, Miami, Florida, 33136, United States|McLean Hospital, Belmont, Massachusetts, 02478, United States|New York State Psychiatric Institute, New York, New York, 10032, United States|University of Texas Southwestern Medical Center, Dallas, Texas, 75235, United States	Study Protocol, https://storage.googleapis.com/ctgov2-large-docs/48/NCT02129348/Prot_000.pdf|Statistical Analysis Plan, https://storage.googleapis.com/ctgov2-large-docs/48/NCT02129348/SAP_001.pdf
Lithium	NCT02204969	LIWA for Treatment of Alzheimer Patients	https://clinicaltrials.gov/study/NCT02204969	LIWA	UNKNOWN	The thermal therapy combined with magnetic fields and ozone has a direct effect on patients with dementia and Alzheimer's with a regression of more than 60% of them	NO	Alzheimer Disease	DIETARY_SUPPLEMENT: Lithia water|DEVICE: Transcranial Magnetic stimulation	Cognitive functioning score by ADAS-COG, 4 months			American Society Of Thermalism And Climatology Inc		ALL	ADULT, OLDER_ADULT	PHASE1|PHASE2	100	OTHER	INTERVENTIONAL	Allocation: RANDOMIZED|Intervention Model: SINGLE_GROUP|Masking: SINGLE (INVESTIGATOR)|Primary Purpose: TREATMENT	822429989	2015-01-01	2015-06-01	2015-12-01	2014-07-31		2015-01-06	Gaviota Clinic, Newark, New Jersey, 07105, United States
Mecamylamine	NCT04129060	Cholinergic Health After Menopause (CHAMP)	https://clinicaltrials.gov/study/NCT04129060	CHAMP	RECRUITING	Women are at increased risk for Alzheimer's disease (AD). Notably at menopause, some women experience a change in cognition. However, not all women experience negative effects of menopause on cognition. The cognitive changes that occur at menopause have not yet been connected to late life risk for pathological aging including AD. Thus, understanding the neurobiological factors related to individu…	NO	Postmenopausal Symptoms|Aging|Alzheimer Disease	DRUG: Cholinergic antagonist	Blood Oxygen Dependent (BOLD) functional magnetic resonance imaging (fMRI), BOLD fMRI signal will be measured while each participant performs the N-back test., Two hours post drug administration|Working Memory Performance, We will assess performance on the N-back test of working memory test., Two hours post drug administration|Basal Forebrain Cholinergic System Volume, We will measure basal foreb…			University of Vermont	Vanderbilt University Medical Center	FEMALE	ADULT, OLDER_ADULT	EARLY_PHASE1	120	OTHER	INTERVENTIONAL	Allocation: RANDOMIZED|Intervention Model: CROSSOVER|Masking: DOUBLE (PARTICIPANT, INVESTIGATOR)|Primary Purpose: BASIC_SCIENCE	STUDY00000581	2020-03-15	2024-03-31	2024-05-31	2019-10-16		2023-05-09	Vanderbilt University Medical Center, Nashville, Tennessee, 37212, United States|University of Vermont, Burlington, Vermont, 05401, United States
Phenserine	NCT01072812	Study of the Pharmacokinetics and Pharmacodynamics of POSIPHEN® in Subjects With Amnestic Mild Cognitive Impairment	https://clinicaltrials.gov/study/NCT01072812		TERMINATED	This trial will determine the pharmacokinetics of Posiphen® in both plasma and CSF after a 10-day treatment period with Posiphen® in subjects with amnestic MCI. The effects of this treatment on biomarkers will also be determined in CSF, whole blood, and plasma or serum as primary pharmacodynamic (PD) objectives.	NO	Alzheimer's Disease|Amnestic Mild Cognitive Impairment	DRUG: Posiphen® tartrate capsules	Pharmacokinetics, To determine the pharmacokinetics (PK) of Posiphen® and its metabolites in plasma and CSF after a 10-day treatment period with Posiphen®., 10 days|Pharmacodynamics, To assess the effects of a 10-day treatment period with Posiphen® on the levels of amyloid precursor protein (APP), amyloid 帣 protein 40 (A帣40), amyloid 帣 protein 42 (A帣42), acetylcholinesterase (AChE), and butyrylch…	Biomarkers, To assess the effects of a 10-day treatment period with Posiphen® on the levels of amino terminal fragment (N-APP), tau (T-tau), phosphorylated tau (P-tau), nerve growth factor (NGF), brain derived neurotrophic factor (BDNF), interleukin 1B (IL1B), S-100B protein (S-100B) in plasma or serum and CSF, and the activities of AChE and BChE in whole blood or plasma and CSF from subjects wit…		Annovis Bio Inc.		ALL	ADULT, OLDER_ADULT	PHASE1	5	INDUSTRY	INTERVENTIONAL	Allocation: NA|Intervention Model: SINGLE_GROUP|Masking: NONE|Primary Purpose: TREATMENT	QR 12001	2010-02-01	2010-07-01	2010-07-01	2010-02-22		2015-04-22	CEDRA Clinical Research, LLC, San Antonio, Texas, 78217, United States
Phenserine	NCT02925650	Safety, Tolerability, PK and PD of Posiphen® in Subjects With Early Alzheimer's Disease	https://clinicaltrials.gov/study/NCT02925650	DISCOVER	COMPLETED	This study evaluates the safety and pharmacological effects of 3 different doses of Posiphen® when compared to a placebo, in adult male and female patients with early Alzheimer's disease (AD).	YES	Alzheimer's Disease	DRUG: Posiphen|DRUG: Placebo	Safety and Tolerability of Multiple Ascending Doses of Posiphen: Reports of Adverse Events or Study Discontinuations, Number of adverse events or study discontinuations, broken down by dose arm (i.e. Low vs. Medium vs. High vs. Placebo), and further broken down by relatedness to Posiphen (Definitely Related, Probably Related, Possibly Related, Unlikely Related, Unrelated), Up to 25 days|The Level…	Feasibility of CSF Catheter Study With SILK??Technology to Evaluate Rates of Enrollment, Feasibility of CSF Catheter Study with SILK??Technology was determined by comparing the total number of participants enrolled, randomized and treated with study drug in the trial to the total number of participants who completed the CSF Catheter Study across all participating sites., Up to 25 days|Feasibility…		Annovis Bio Inc.	Alzheimer's Disease Cooperative Study (ADCS)	ALL	ADULT, OLDER_ADULT	PHASE1|PHASE2	18	INDUSTRY	INTERVENTIONAL	Allocation: RANDOMIZED|Intervention Model: PARALLEL|Masking: QUADRUPLE (PARTICIPANT, CARE_PROVIDER, INVESTIGATOR, OUTCOMES_ASSESSOR)|Primary Purpose: TREATMENT	QR15001|ADC-042-DISC	2017-03-02	2021-12-10	2021-12-31	2016-10-06	2023-01-09	2023-05-09	UCSD Alzheimer's Disease Research Center, La Jolla, California, 92037, United States|IU Health Partners, Adult Neurology Clinic, Indianapolis, Indiana, 46202, United States|Johns Hopkins Hospital, Baltimore, Maryland, 21287, United States|Washington University Sleep Medicine Center, Brentwood, Missouri, 63144, United States|Columbia University Medical Center Sergievsky Center Taub Institute, New …	Study Protocol, https://storage.googleapis.com/ctgov2-large-docs/50/NCT02925650/Prot_000.pdf|Statistical Analysis Plan, https://storage.googleapis.com/ctgov2-large-docs/50/NCT02925650/SAP_001.pdf|Informed Consent Form, https://storage.googleapis.com/ctgov2-large-docs/50/NCT02925650/ICF_003.pdf
Phenserine	NCT04524351	Posiphen® Dose-Finding, Biomarker Study in Early Alzheimer's and Parkinson's Patients	https://clinicaltrials.gov/study/NCT04524351		COMPLETED	Annovis is conducting a clinical study to investigate Posiphen in patients with Early Alzheimer's Disease (AD) and Early Parkinson's Disease (PD). Investigators are looking to recruit 68 patients in two parts of the study. In Part one of the study Investigators will recruit 14 AD and 14 PD patients who will either receive placebo (an inert pill which looks like the study drug) or the study drug P…	YES	Alzheimer Disease|Parkinson Disease	DRUG: Posiphen|DRUG: Placebo	Percentage of Participants With Treatment-Emergent Adverse Events, Percent of patients with AEs in the Posiphen treatment arms compared to the Placebo group, 25簣2 days	Concentration of Posiphen in Plasma, Maximum Plasma Concentration (Cmax) of Posiphen reported as ng/mL., Samples collected over a 6 hour timeframe	Change in Abeta42/Abeta40 Ratio, Biomarker related to neurotoxic protein cascade measured in patient sample, Baseline to 25簣2 days|Changes in Functional Impairment, Functional impairment will be evaluated using the Clinical Dementia Rating (CDR) scale (Berg1988) for AD., Baseline to 25簣2 days|Changes in Functional Impairment, Functional impairment will be evaluated using the Unified Parkinson's D…	Annovis Bio Inc.	Parexel	ALL	ADULT, OLDER_ADULT	PHASE1|PHASE2	75	INDUSTRY	INTERVENTIONAL	Allocation: RANDOMIZED|Intervention Model: PARALLEL|Masking: QUADRUPLE (PARTICIPANT, CARE_PROVIDER, INVESTIGATOR, OUTCOMES_ASSESSOR)|Primary Purpose: TREATMENT	ANVS-12003	2020-08-14	2021-08-16	2022-01-31	2020-08-24	2023-01-11	2023-02-28	New England Institute for Clinical Research, Stamford, Connecticut, 06905, United States|DeLand Clinical Research Unit, DeLand, Florida, 32720, United States|MD Clinical, Hallandale Beach, Florida, 33009, United States|Homestead Associates in Research, Miami, Florida, 33032, United States|Ezy Medical Research Co., Miami, Florida, 33175, United States|Conquest Research LLC, Winter Park, Florida, 3…	Study Protocol, https://storage.googleapis.com/ctgov2-large-docs/51/NCT04524351/Prot_000.pdf|Statistical Analysis Plan, https://storage.googleapis.com/ctgov2-large-docs/51/NCT04524351/SAP_002.pdf
Phenserine	NCT05686044	A Dose-ranging Study to Investigate Efficacy of Buntanetap in Mild to Moderate AD	https://clinicaltrials.gov/study/NCT05686044		COMPLETED	The purpose of this study is to measure efficacy and safety of three different doses of buntanetap/Posiphen compared with placebo in participants with mild to moderate Alzheimer's disease.|Study details include:|The double-blind treatment duration will include a screening period of up to 42 days followed by 12 weeks of treatment at home.|The study duration will be 4-5 months. There will be 4 in-c…	NO	Alzheimer Disease	DRUG: Buntanetap/Posiphen|DRUG: Placebo	Alzheimer's Disease Assessment Scale-Cognitive Subscale 11, Alzheimer's Disease Assessment Scale-Cognitive Subscale 11 (ADAS-Cog 11) measures cognitive functions and non-cognitive functions such as mood and behavior. It was designed to measure the cognitive and behavioral domains known to be affected in Alzheimer disease, including memory, language, orientation, construction, and planning of simp…	Alzheimer's Disease Cooperative Study-Instrumental Activities of Daily Living Scale, Alzheimer's Disease Cooperative Study-Instrumental Activities of Daily Living Scale (ADCS-ADL) is a 23-item inventory scale developed as a rater-administered questionnaire answered by the participant's study partner.|The ADCS-ADL measures 6 basic activities of daily living (BADL) items and 17 instrumental activit…		Annovis Bio Inc.		ALL	ADULT, OLDER_ADULT	PHASE2|PHASE3	320	INDUSTRY	INTERVENTIONAL	Allocation: RANDOMIZED|Intervention Model: PARALLEL|Masking: QUADRUPLE (PARTICIPANT, CARE_PROVIDER, INVESTIGATOR, OUTCOMES_ASSESSOR)|Primary Purpose: TREATMENT	ANVS -22002	2023-04-01	2024-02-13	2024-02-13	2023-01-17		2024-02-20	CCT Research - Gilbert Neurology Partners, Gilbert, Arizona, 85297, United States|CCT Research - Foothills Center, Phoenix, Arizona, 85004, United States|The Belinga Clinic, Fort Smith, Arkansas, 72916, United States|Sun Valley Research Center, Imperial, California, 92251, United States|CenExel Clinical Clinical Research, Inc, Los Alamitos, California, 90720, United States|Cenexel Rocky Mountain …
Pimavanserin	NCT02035553	A Study of the Safety and Efficacy of Pimavanserin in Patients With Alzheimer's Disease Psychosis	https://clinicaltrials.gov/study/NCT02035553		COMPLETED	This study will evaluate the safety and efficacy of pimavanserin 40 mg compared to placebo in patients with Alzheimer's disease psychosis.	YES	Alzheimer's Disease Psychosis	DRUG: Pimavanserin tartrate|DRUG: Placebo	Antipsychotic Efficacy, Change from Baseline to Day 43 in the Neuropsychiatric Inventory-Nursing Home Version (NPI-NH) psychosis score (Delusions \[Domain A\]+Hallucinations \[Domain B\]) in the Full Analysis Set (FAS). The NPI-NH is a questionnaire that quantifies behavioral changes in dementia in nursing home patients and evaluates 12 behavioral domains. For each of the 12 behavioral domains th…			ACADIA Pharmaceuticals Inc.		ALL	ADULT, OLDER_ADULT	PHASE2	181	INDUSTRY	INTERVENTIONAL	Allocation: RANDOMIZED|Intervention Model: PARALLEL|Masking: QUADRUPLE (PARTICIPANT, CARE_PROVIDER, INVESTIGATOR, OUTCOMES_ASSESSOR)|Primary Purpose: TREATMENT	ACP-103-019	2013-11-01	2016-09-28	2016-10-27	2014-01-14	2017-09-28	2017-10-25	London, United Kingdom
Pimavanserin	NCT02992132	Study to Examine the Safety and Efficacy of Pimavanserin for the Treatment of Agitation and Aggression in Alzheimer's Disease (SERENE)	https://clinicaltrials.gov/study/NCT02992132		TERMINATED	To evaluate the efficacy of pimavanserin compared with placebo in treatment of agitation and aggression after 12 weeks of treatment	YES	Agitation and Aggression in Alzheimer's Disease	DRUG: Pimavanserin 34 mg|DRUG: Pimavanserin 20 mg|OTHER: Placebo	Cohen-Mansfield Agitation Inventory (CMAI), The Cohen-Mansfield Agitation Inventory (CMAI) is a 29-item scale to assess agitation. Each item is rated on a 7-point scale of frequency, from least (1) to most frequent (7). Items are summed to calculate the CMAI total score. The CMAI total score has a range of 29-203 points; higher scores indicate more severe agitation, Baseline to 12 weeks	Zarit Burden Interview, The Zarit Burden Interview (ZBI) assess the stresses experienced by caregivers of patients with dementia. It assesses 22 questions about the impact of the patient's disabilities on the caregiver's life, each rated from least (0) to most (4) frequent. Items are summed to calculate the ZBI total score. The ZBI total score ranges from 0 to 88; higher scores denoting more stre…		ACADIA Pharmaceuticals Inc.		ALL	ADULT, OLDER_ADULT	PHASE2	111	INDUSTRY	INTERVENTIONAL	Allocation: RANDOMIZED|Intervention Model: PARALLEL|Masking: QUADRUPLE (PARTICIPANT, CARE_PROVIDER, INVESTIGATOR, OUTCOMES_ASSESSOR)|Primary Purpose: TREATMENT	ACP-103-032|2016-001127-32	2016-11-01	2018-01-25	2018-02-16	2016-12-14	2019-01-25	2019-03-28	Costa Mesa, California, 92626, United States|Fresno, California, 93710, United States|Fullerton, California, 92835, United States|Los Angeles, California, 90073, United States|Pasadena, California, 91105, United States|San Diego, California, 92103, United States|Danbury, Connecticut, 06810, United States|Washington, District of Columbia, 20007, United States|Boca Raton, Florida, 33486, United Sta…	Statistical Analysis Plan, https://storage.googleapis.com/ctgov2-large-docs/32/NCT02992132/SAP_000.pdf|Study Protocol, https://storage.googleapis.com/ctgov2-large-docs/32/NCT02992132/Prot_001.pdf
Pimavanserin	NCT03118947	A Study of Pimavanserin for the Treatment of Agitation and Aggression in Subjects With Alzheimer's Disease	https://clinicaltrials.gov/study/NCT03118947		COMPLETED	To evaluate the safety and tolerability of pimavanserin over 52 weeks of treatment in subjects with probable AD who have symptoms of agitation and aggression	YES	Agitation and Aggression in Alzheimer's Disease	DRUG: Pimavanserin	Treatment Emergent Adverse Events (TEAEs), Safety and tolerability of pimavanserin after 52 weeks of treatment in patients with probable Alzheimer's disease who have symptoms of agitation and Aggression, in terms of occurrence of TEAEs, 52 weeks			ACADIA Pharmaceuticals Inc.		ALL	ADULT, OLDER_ADULT	PHASE2	79	INDUSTRY	INTERVENTIONAL	Allocation: NA|Intervention Model: SINGLE_GROUP|Masking: NONE|Primary Purpose: TREATMENT	ACP-103-033|2016-001128-78	2017-02-23	2019-02-25	2019-02-25	2017-04-18	2020-02-25	2020-04-09	ATP Clinical Research, Inc., Costa Mesa, California, 92626, United States|Neuro-Pain Medical Center, Fresno, California, 93710, United States|Neurology Center of North Orange County, Fullerton, California, 92835, United States|Pacific Clinical Research Network, San Diego, California, 92103, United States|Clinical Research Unit, Washington, District of Columbia, 20007, United States|Parkinson's Di…	Study Protocol, https://storage.googleapis.com/ctgov2-large-docs/47/NCT03118947/Prot_000.pdf|Statistical Analysis Plan, https://storage.googleapis.com/ctgov2-large-docs/47/NCT03118947/SAP_001.pdf
Acamprosate / Baclofen	NCT02361242	24-week Open-label Extension Study Evaluating PXT00864 Effect in Mild AD Patients Further to PLEODIAL-I Completion	https://clinicaltrials.gov/study/NCT02361242	PLEODIAL-II	COMPLETED	PLEODIAL-II study is an extension of the previous pilot PLEODIAL-I study (CLN-PXT00864-03 protocol) and is designed for the descriptive analysis of patients with mild AD who are exposed to PXT00864 over an additional 24-week period.	NO	Alzheimer Disease	DRUG: PXT00864	Change from Baseline in the total score of the 11-items Alzheimer's Disease Assessment Scale- Cognitive Subscale (ADAS-Cog), Scores on the ADAS-Cog range from 0 to 70 with higher scores indicating greater cognitive impairment, V5 (study entry), V6 (after 12 weeks), V7 (after 24 weeks)|Number of Treatment Emergent Adverse Events (TEAEs), throughout the 24-week study period			Pharnext S.C.A.	Ascopharm Groupe Novasco	ALL	ADULT, OLDER_ADULT	PHASE2	45	OTHER	INTERVENTIONAL	Allocation: NON_RANDOMIZED|Intervention Model: PARALLEL|Masking: NONE|Primary Purpose: TREATMENT	CLN-PXT00864-04	2013-06-01	2015-12-01	2015-12-01	2015-02-11		2016-02-15	CMRR, Bordeaux, France
Acamprosate / Baclofen	NCT02361424	Pilot Study Assessing the Effects of PXT00864 in Patients With Mild Alzheimer Disease (AD)	https://clinicaltrials.gov/study/NCT02361424	PLEODIAL-I	COMPLETED	The purpose of this study is to assess the safety and efficacy on cognitive impairment and functioning of several doses of PXT00864 (new fixed combination of acamprosate and baclofen at low dose) in patients with mild Alzheimer Disease.	NO	Alzheimer Disease	DRUG: PXT00864|DRUG: placebo	Change From Baseline in the total score of the 11-item Alzheimer織s Disease Assessment Scale- Cognitive Subscale (ADAS-Cog), Scores on the ADAS-Cog range from 0-70 with higher scores indicating greater cognitive impairment., Visit V0 (train), V1 (baseline), and every 4 weeks (visits V2, V3 and V4)|Number of Treatment Emergent Adverse Events (TEAEs), throughout the 12-week study period.	Change From Baseline in the score of the Digit Symbol Substitution Test (DSST), Scores on the DSST range from 0-93 with lower scores indicating greater impairment., Visit V0 (train), V1 (baseline), and every 4 weeks (visits V2, V3 and V4)|Change From Baseline in the speed to perform the Zazzo's Cancellation Test, Visit V0 (train), V1 (baseline), and every 4 weeks (visits V2, V3 and V4)|Change Fro…	Change From Baseline in the cognitive Event Related Potential parameters (optional), Some cognitive Event Related Potentials (ERP) with auditory oddball paradigm are performed as an ancillary study., V1 (baseline), and every 4 weeks (V2, V3 and V4)	Pharnext S.C.A.	Ascopharm Groupe Novasco	ALL	ADULT, OLDER_ADULT	PHASE2	47	OTHER	INTERVENTIONAL	Allocation: NON_RANDOMIZED|Intervention Model: CROSSOVER|Masking: TRIPLE (PARTICIPANT, CARE_PROVIDER, OUTCOMES_ASSESSOR)|Primary Purpose: TREATMENT	CLN-PXT00864-03	2013-02-01	2015-06-01	2015-06-01	2015-02-11		2016-02-15	CMRR, Bordeaux, France
Psilocybin	NCT04123314	Psilocybin for Depression in People With Mild Cognitive Impairment or Early Alzheimer's Disease	https://clinicaltrials.gov/study/NCT04123314		RECRUITING	This open-label pilot study examines whether the hallucinogenic drug, psilocybin, given under supportive conditions, is safe and effective for depression in people with Mild Cognitive Impairment (MCI) or early Alzheimer's Disease (AD). This study will also assess whether psilocybin may improve quality of life in those individuals.	NO	Depressive Symptoms|Depression|Alzheimer Disease|Mild Cognitive Impairment	DRUG: Psilocybin	Change in Cornell Scale for Depression in Dementia (CSDD) score, The Cornell Scale for Depression in Dementia (CSDD) is administered via patient and informant interviews to assess the presence and severity of depressive mood and behavioral symptoms during the past week. Has 19 items, each scored from 0 to 2 with higher scores indicating severe symptom.Total score range from 0 to 38., Baseline and…	Change in Quality of Life Alzheimer's Disease (QOL-AD) scale score, The Quality of Life Alzheimer's Disease (QOL-AD) scale is a 13-item measure administered via patient and informant interviews to assess overall mood, physical and cognitive function, and quality of relationships in people with Alzheimer's Disease. Each item is scored 1 to 4, with higher score indicating better quality of life. To…		Johns Hopkins University		ALL	ADULT, OLDER_ADULT	EARLY_PHASE1	20	OTHER	INTERVENTIONAL	Allocation: NA|Intervention Model: SINGLE_GROUP|Masking: NONE|Primary Purpose: TREATMENT	IRB00175915	2021-03-24	2024-12-30	2024-12-30	2019-10-10		2023-08-14	Behavioral Pharmacology Research Unit, Baltimore, Maryland, 21224, United States
Rasagiline mesylate	NCT00104273	Rasagiline 1 mg and 2 mg Added to Aricept 10 mg Daily in Patients With Mild to Moderate Alzheimer's Disease (AD)	https://clinicaltrials.gov/study/NCT00104273		COMPLETED	The purpose of this study is to evaluate the safety, tolerability, and efficacy of two dose levels of rasagiline mesylate versus placebo in patients with mild-to-moderate Alzheimer's Disease who are taking Aricept.	NO	Dementia|Alzheimer's Disease	DRUG: Rasagiline	Cognitive Function	Other Cognitive Assessments; Activities of Daily Living (ADLs); Functional Assessments; Safety; Tolerability.		Teva Branded Pharmaceutical Products R&D, Inc.	Eisai Inc.	ALL	ADULT, OLDER_ADULT	PHASE2	376	INDUSTRY	INTERVENTIONAL	Allocation: RANDOMIZED|Intervention Model: PARALLEL|Masking: DOUBLE (PARTICIPANT, INVESTIGATOR)|Primary Purpose: TREATMENT	TVP-1012-A001-201	2004-08-01	2007-03-01		2005-02-25		2009-07-15	Collaborative Neuroscience Network, Huntsville, Alabama, 35801, United States|North Alabama Neuroscience Research, Huntsville, Alabama, 35801, United States|Northwest Neurospecialists, PLLC, Tucson, Arizona, 85741-3537, United States|Clinical Study Centers, LLC, Little Rock, Arkansas, 72205, United States|East Bay Region Associates in Neurology, Berkeley, California, 94705, United States|Margolin…
Rasagiline mesylate	NCT02359552	Rasagiline Rescue in Alzheimer's Disease Clinical Trial	https://clinicaltrials.gov/study/NCT02359552	R2	COMPLETED	This is a Phase II, randomized, double blind, placebo controlled, parallel group, proof of concept three-site study, to evaluate the effect of Rasagiline in the regional brain metabolism on 18F-2-fluoro-2-deoxy-D-glucose fluorodeoxyglucose (FDG-PET).	YES	Alzheimer's Disease	DRUG: Rasagiline|DRUG: Placebo	Change in Regional Glucose Metabolism Between Week 24 and Baseline as Measured by 18F-2-fluoro-2-deoxy-D-glucose Positron Emission Tomography (FDG-PET)., The primary outcome measure is the change from baseline to week 24 in FDG-PET as measured by Standard Uptake Units Regional (SUVR) in several pre-specified brain regions including the medial temporal, lateral temporal, posterior cingulate - prec…	Change in ADAS-Cog 11 (Alzheimer's Disease Assessment Scale - Cognitive 11) Score, The ADAS-Cog 11 (Alzheimer's Disease Assessment Scale - Cognitive 11) is a psychometric instrument that evaluates memory, attention, reasoning, language, orientation, and praxis. A higher score indicates more impairment. Scores from the original portion of the test range from 0 (best) to 70 (worse). We used total A…		The Cleveland Clinic		ALL	ADULT, OLDER_ADULT	PHASE2	50	OTHER	INTERVENTIONAL	Allocation: RANDOMIZED|Intervention Model: PARALLEL|Masking: TRIPLE (PARTICIPANT, CARE_PROVIDER, INVESTIGATOR)|Primary Purpose: TREATMENT	14-519	2015-05-01	2018-08-29	2019-01-04	2015-02-10	2020-01-06	2020-11-10	Cleveland Clinic Lou Ruvo Center for Brain Health, Las Vegas, Nevada, 89106, United States|Cleveland Clinic Main Campus, Cleveland, Ohio, 44195, United States|Cleveland Clinic Lakewood Hospital, Lakewood, Ohio, 44107, United States	Study Protocol, https://storage.googleapis.com/ctgov2-large-docs/52/NCT02359552/Prot_000.pdf|Statistical Analysis Plan, https://storage.googleapis.com/ctgov2-large-docs/52/NCT02359552/SAP_001.pdf
ST-101	NCT00842673	Preliminary Efficacy and Safety Study of ST101 in Alzheimer's Disease	https://clinicaltrials.gov/study/NCT00842673		COMPLETED	This study will investigate the ability of ST101 to improve memory in people with Alzheimer's disease. This study also will examine the safety and tolerability of the drug. This study is evaluating 3 different dose levels of ST101 and placebo. Patients will have a 1 in 4 chance of getting placebo.	NO	Alzheimer's Disease	DRUG: ST101|DRUG: ST101|DRUG: ST101|DRUG: Placebo	Alzheimer's Disease Assessment Scale, Cognitive Subscale (ADAS-cog), Baseline, 4 weeks, 8 weeks,12 weeks	Alzheimer's Disease Cooperative Study - Activities of Daily Living (ADCS-ADL), Baseline, 4 weeks, 8 weeks, 12 weeks|Neuropsychiatric Inventory (NPI), Baseline, 4 weeks, 8 weeks, 12 weeks|Alzheimer's Disease Cooperative Study- Clinical Global Impression (ADCS-CGI), Baseline (severity); 4 weeks, 8 weeks, 12 weeks (change)		Sonexa Therapeutics, Inc.		ALL	ADULT, OLDER_ADULT	PHASE2	168	INDUSTRY	INTERVENTIONAL	Allocation: RANDOMIZED|Intervention Model: PARALLEL|Masking: QUADRUPLE (PARTICIPANT, CARE_PROVIDER, INVESTIGATOR, OUTCOMES_ASSESSOR)|Primary Purpose: TREATMENT	ST101-A001-201	2009-02-01	2010-09-01	2010-09-01	2009-02-12		2012-06-07	Costa Mesa, California, United States|Redlands, California, United States|San Diego, California, United States|Walnut Creek, California, United States|Deerfield Beach, Florida, United States|Delray Beach, Florida, United States|Orlando, Florida, United States|West Palm Beach, Florida, United States|Indianapolis, Indiana, United States|Shreveport, Louisiana, United States|Durham, North Carolina, U…
ST-101	NCT00842816	Preliminary Efficacy and Safety Study of ST101 Plus Aricept in Alzheimer's Disease	https://clinicaltrials.gov/study/NCT00842816		COMPLETED	This study will investigate the ability of ST101 to improve memory in people with Alzheimer's disease who currently receive 10 mg Aricept® (donepezil) per day. This study also will examine the safety and tolerability of the drug. This study is evaluating 3 different dose levels of ST101 and placebo. Patients will have a 1 in 4 chance of getting placebo. All eligible subjects will be provided with…	NO	Alzheimer's Disease	DRUG: ST101|DRUG: ST101|DRUG: ST101|DRUG: Placebo	Alzheimer's Disease Assessment Scale, cognitive subscale (ADAS-cog), Baseline, 4 weeks, 8 weeks, 12 weeks	Alzheimer's Disease Cooperative Study - Activities of Daily Living (ADCS-ADL), Baseline, 4 weeks, 8 weeks, 12 weeks|Neuropsychiatric Inventory (NPI), Baseline, 4 weeks, 8 weeks, 12 weeks|Alzheimer's Disease Cooperative Study- Clinical Global Impression (ADCS-CGI), Baseline (severity); 4 weeks, 8 weeks, 12 weeks (change)		Sonexa Therapeutics, Inc.		ALL	ADULT, OLDER_ADULT	PHASE2	210	INDUSTRY	INTERVENTIONAL	Allocation: RANDOMIZED|Intervention Model: PARALLEL|Masking: QUADRUPLE (PARTICIPANT, CARE_PROVIDER, INVESTIGATOR, OUTCOMES_ASSESSOR)|Primary Purpose: TREATMENT	ST101-A001-202	2009-02-01	2011-05-01	2011-05-01	2009-02-12		2012-06-07	Tucson, Arizona, United States|Costa Mesa, California, United States|Redlands, California, United States|San Diego, California, United States|Walnut Creek, California, United States|Hamden, Connecticut, United States|Brooksville, Florida, United States|Deerfield Beach, Florida, United States|Delray Beach, Florida, United States|Orlando, Florida, United States|St. Petersburg, Florida, United State…
