# Supplementary material for: DrugReX: an explainable drug repurposing system powered by large language models and literature-based knowledge graph
Source: Research Square preprint supplement (doi:10.21203/rs.3.rs-6728958/v1), 2025-06-16
Supplement: Supplementary file 2 [file 69c6386b3cf9f423e1a0c084.xlsx]

## Sheet: Phenserine
Hypothesis (using supporting sentences)		(Un)Related	Ref	Subject Entity Name	Relation type	Object Entity Name	URL	Sentence
Based on the evidence presented, it can be hypothesized that phenserine may treat Alzheimer's disease (AD) by reducing the production of amyloid precursor protein and beta-amyloid, key components in the formation of amyloid plaques, a hallmark of AD [23,31,79]. Phenserine has been shown to significantly increase doublecortin immunoreactivity within the subventricular zone of AD mice, suggesting a…		Unrelated	1	leukemia inhibitory factor	ASSOCIATED_WITH	cerebellar function	https://pubmed.ncbi.nlm.nih.gov/11036218/	Injection of a murine hemopoietic cell line, FDC-P1 cells, transfected with the complementary DNA encoding the leukemia inhibitory factor led to a reduction in calbindin-positive dendrites of the Purkinje cells.The present results suggest that the leukemia inhibitory factor affects cerebellar functions through Purkinje cells.
		Unrelated	2	AVENANTHRAMIDES	TREATS	Childhood Solid Neoplasm	https://pubmed.ncbi.nlm.nih.gov/30755785/	For the study, 75 female mice were randomly and equally allocated to five groups (group 1-control, group 2-DMSO, group 3-positive control receiving Avns, group 4-mice with Ehrlich solid tumor, and group 5-Ehrlich solid tumor treated with Avns).
		Unrelated	3	Antithrombotic Agents	TREATS	Transient Ischemic Attack	https://pubmed.ncbi.nlm.nih.gov/23661651/	A few months before, our patient experienced multiple, stereotyped, brief episodes of spreading paraesthesias, which were considered to be transient ischaemic attacks (TIAs) and treated with antithrombotic agents.
		Related	4	acetylcholinesterase activity	COEXISTS_WITH	Alzheimer Disease, Early Onset	https://pubmed.ncbi.nlm.nih.gov/17370645/	The AchE activities (k3) in early onset AD measured with PET was low in hippocampus, amygdale and wide spread neocortex including parietal and temporal cortex compared to those in age-matched control.
		Related	5	acetylcholinesterase activity	COEXISTS_WITH	Alzheimer disease, familial, type 3	https://www.ncbi.nlm.nih.gov/pmc/articles/PMC4865532/	Spared thalamic AChE activity in AD.[123I]IBVMVAChT[29]SPECT10 PSP, 12 HCSignificant reduction in anterior cingulate cortical, innominatocortical, thalamic and pontothalamic VAChT levels Thalamic and pedunculopontine binding inversely correlated with disease duration.
		Unrelated	6	prohibitin	ASSOCIATED_WITH	Carcinoma, Papillary	https://pubmed.ncbi.nlm.nih.gov/12112852/	In addition, overexpression of ATP synthase D chain and prohibitin were observed in papillary carcinoma, which should allow it to be differentiated from follicular carcinoma.
		Unrelated	7	E-Cadherin	ASSOCIATED_WITH	Precancerous lesion	https://pubmed.ncbi.nlm.nih.gov/10547575/	The common 18-base pair deletion at codons 418-423 of the E-cadherin gene in differentiated-type adenocarcinomas and intramucosal precancerous lesions of the stomach with the features of gastric foveolar epithelium.
		Related	8	Protein Biosynthesis	COEXISTS_WITH	Alzheimer's Disease	https://www.ncbi.nlm.nih.gov/pmc/articles/PMC5377624/	Some data also indicate a possible defect in RNA metabolism and protein synthesis in SDAT.
		Unrelated	9	DIRECT ACTING ANTIVIRALS	INHIBITS	Liver diseases	https://www.ncbi.nlm.nih.gov/pmc/articles/PMC5055433/	In light of the new direct-acting antivirals for HCV treatment, which have the potential to reduce incidence of liver-related disease, the research reviewed here, in addition to lessons leveraged from the early history of ART, may prove pivotal in addressing HCV-related mortality among PWID.
		Unrelated	10	carboxymethyl-chitosan	INHIBITS	tumor growth	https://www.ncbi.nlm.nih.gov/pmc/articles/PMC5755166/	In vivo, ADM-loaded LMCC was the most effective combination at suppressing tumor growth, compared with free ADM and ADM-AMCC nanomedicine in the H22 xenograft mouse model.
		Unrelated	11	Fatty Acids, Monounsaturated	ASSOCIATED_WITH	PREMATURE CHROMATID SEPARATION TRAIT	https://www.ncbi.nlm.nih.gov/pmc/articles/PMC4095759/	The effect of dietary intake of MUFA was studied in four PCS (57, 85 87), in a pooled analysis by Jakobsen et al.
		Related	12	Amyloid beta-Peptides	CAUSES	Alzheimer's Disease	https://pubmed.ncbi.nlm.nih.gov/2907602/	It is thus very tempting to speculate that a defect (or defects) of the amyloid beta protein gene is the cause of Alzheimer's disease.
		Unrelated	13	Anti-epileptic Agent [EPC]	CAUSES	Absence Epilepsy	https://pubmed.ncbi.nlm.nih.gov/12536034/	Anti-epileptic drugs-induced de novo absence seizures.
		Related	14	Microhemorrhage	CAUSES	Alzheimer's Disease	https://pubmed.ncbi.nlm.nih.gov/31084613/	The majority of AD patients also have Abeta deposition in cerebral vessels known as cerebral amyloid angiopathy (CAA), microhemorrhages, and vascular co-morbidities, suggesting that cerebrovascular dysfunction contributes to AD etiology.
Quality score: 5 (strong evidence to support the hypothesis. Does give some detail mechanisms and make good logical inferences)		Related	15	Amyloid beta-Peptides	ASSOCIATED_WITH	Alzheimer Disease 7	https://www.ncbi.nlm.nih.gov/pmc/articles/PMC7989959/	Aggregation and misfolding of amyloid-beta (A ) is a potential mechanism in AD patients.7 A monomers assemble into A O (A oligomers) and fibrils and are then distributed into the circulating blood or cerebrospinal fluid (CSF).1 The A O is neurotoxic and is highly correlated with severe AD.
		Unrelated	16	S-methyl methanethiosulfonate	INHIBITS	Colonic Neoplasms	https://www.ncbi.nlm.nih.gov/pmc/articles/PMC6009886/	It is well known from literature that S-methyl methanethiosulfonate (SMMTS), isolated from cauliflower, is able to inhibit colon tumor incidence when administered to rats during the post-initiation phase of carcinogenesis16.
Hypothesis (using supporting sentences and unrelated sentences)		Unrelated	17	Insulin	ASSOCIATED_WITH	dumping	https://www.ncbi.nlm.nih.gov/pmc/articles/PMC1813370/	The thera- peutic implications of this were noted, and the present study was evolved to substantiate the therapeutic benefit of insulin, explore the therapeutic efficacy of an oral hypoglycaemic agent, and investigate the relationship of insulin and carbohydrate metabolism in the dumping reaction.
Phenserine, a reversible acetylcholinesterase (AChE) inhibitor, has been shown to possess neuroprotective properties and the ability to reduce amyloid precursor protein (APP) levels, which are implicated in the pathogenesis of Alzheimer's disease (AD) [88]. The reduction of APP synthesis and Aβ42 concentrations by phenserine has been demonstrated in cell culture, mice, and humans [21]. This is si…		Unrelated	18	carbon dioxide	CAUSES	cardiac event	https://pubmed.ncbi.nlm.nih.gov/16843545/	AIMS: The purpose of this study was to assess the ability of P(ET)CO2 to predict cardiac-related events in a group of subjects with HF.
		Related	19	immunoreactivity	COEXISTS_WITH	Alzheimer Disease 14	https://www.ncbi.nlm.nih.gov/pmc/articles/PMC5357964/	Of interest, CL-P1 immunoreactivity is also increased on reactive astrocytes in AD14.
		Related	20	Amyloid beta-Peptides	ASSOCIATED_WITH	ALZHEIMER DISEASE 18	https://www.ncbi.nlm.nih.gov/pmc/articles/PMC7864928/	Considering the potential functions of the PVS system, studies had proved that the PVS waste drainage system contributed to a larger portion of interstitial solutes clearance, such as amyloid beta (A ), preventing A deposition that was thought to be pathogenic in AD18,22.
		Related	21	phenserine	INHIBITS	amyloid precursor protein biosynthetic process	https://www.ncbi.nlm.nih.gov/pmc/articles/PMC5176356/	After licensing ( )-phenserine for commercial development, Axonyx demonstrated reductions of APP synthesis and A 42 concentrations up to 50% in cell culture, mice and 20% in humans [17,18].
		Related	22	Amyloid beta-Peptides	CAUSES	Alzheimer Disease, Early Onset	https://pubmed.ncbi.nlm.nih.gov/10230703/	Genetic studies on some families have shown that mutations in the genes encoding beta-amyloid precursor protein and presenilins 1 and 2 are responsible for early-onset AD.
		Related	23	phenserine	INHIBITS	Amyloid beta-Peptides	https://pubmed.ncbi.nlm.nih.gov/16049844/	Phenserine reduces the production of the amyloid precursor protein and beta-amyloid in vitro.
		Related	24	Amyloid beta-Peptides	TREATS	Alzheimer's Disease	https://pubmed.ncbi.nlm.nih.gov/17105434/	The biology, structure and physiological properties of beta-amyloid peptide and related proteases (secretases) are discussed, as well as existing therapeutics and future strategies for the treatment of Alzheimer's disease.
		Related	25	Amyloid beta-Peptides	CAUSES	Alzheimer Disease, Late Onset	https://www.ncbi.nlm.nih.gov/pmc/articles/PMC4045094/	In this study, we investigate the influence of interactions between genes previously associated with Alzheimer s Disease (AD) on amyloid-beta (A ) load in an effort to better understand the genetic etiology of A deposition and, by extension, risk for LOAD.
		Related	26	amyloid precursor protein biosynthetic process	COEXISTS_WITH	Alzheimer's Disease	https://pubmed.ncbi.nlm.nih.gov/2510037/	Focusing on IL-1-promotion of beta-amyloid precursor protein synthesis as an early event in Alzheimer's disease.
		Unrelated	27	Total cholesterol	CAUSES	vascular inflammations	https://pubmed.ncbi.nlm.nih.gov/24632108/	Prolonged consumption of the repeatedly heated oil has been shown to increase blood pressure and total cholesterol, cause vascular inflammation as well as vascular changes which predispose to atherosclerosis.
		Related	28	Amyloid beta-Peptides	COMPLICATES	Alzheimer's Disease	https://www.ncbi.nlm.nih.gov/pmc/articles/PMC7388140/	Elevated cortisol levels and HPA axis dysfunction are implicated in chronic stress, which releases amyloid beta (A ) that causes and/or worsens AD (109).
		Unrelated	29	Basis	TREATS	Acute diverticulitis	https://www.ncbi.nlm.nih.gov/pmc/articles/PMC4065711/	In the meantime, treatment must be decided on an individual basis when treating acute perforated, colonic diverticulitis.
		Unrelated	30	dehydrodiisoeugenol	INHIBITS	tumor growth	https://www.ncbi.nlm.nih.gov/pmc/articles/PMC8035743/	that DEH also inhibited tumor growth in vivo.
		Related	31	Amyloid beta-Peptides	ASSOCIATED_WITH	Alzheimer disease, familial, type 3	https://www.ncbi.nlm.nih.gov/pmc/articles/PMC8476544/	Although the physiological relevance of the fragments generated is not fully understood, one of these, the amyloid-beta peptide (A ) originating from the transmembrane domain of the APP protein, is the main component of brain amyloid plaques in Alzheimer s disease (AD)3,4.
Quality score: 3 (does give some detail mechanisms and make logical inferences)		Unrelated	32	Cathartics	TREATS	insanity	https://www.ncbi.nlm.nih.gov/pmc/articles/PMC5089017/	On the remedial processes of counter-irritation, some useful, but common remarks are made, and then purgation is introduced, From the earliest records of medicine?witness the celebrity of Antecyra and Hellebore purgation has held a high place in the treatment of insanity.
		Unrelated	33	32-33 split proinsulin	CAUSES	Vascular Diseases	https://www.ncbi.nlm.nih.gov/pmc/articles/PMC5389445/	It has also been suggested that the so-called inactive precursors of insulin, such as proinsulin and 32-33 split proinsulin, cause vascular disease, rather than insulin itself (36) and in our study proinsulin had the strongest correlations with LV mass and PWV.
Hypothesis (using relations and unrelated relations)		Related	34	tau Proteins	ASSOCIATED_WITH	Alzheimer's Disease	https://pubmed.ncbi.nlm.nih.gov/2424016/	Microtubule-associated protein tau (tau) is a major antigenic component of paired helical filaments in Alzheimer disease.
Phenserine, a drug known to inhibit amyloid precursor protein biosynthetic process and Amyloid beta-Peptides, may have potential therapeutic effects in the treatment of Alzheimer's disease [21, 23]. Amyloid beta-Peptides are known to cause Alzheimer's disease and are associated with various forms of the disease [12, 22, 25, 28, 39, 42, 53, 54, 68, 74, 77, 83, 87]. Furthermore, the biosynthetic pr…		Related	35	Alzheimer's Disease	ASSOCIATED_WITH	immunoreactivity	https://pubmed.ncbi.nlm.nih.gov/2109482/	By contrast, in AD and in P-D complex a significant decrease in immunoreactivity was observed in all hippocampal strata, and especially of the hippocampal subfield CA1 and the subiculum.
		Unrelated	36	antileukoprotease	CAUSES	aggressive cancer	https://pubmed.ncbi.nlm.nih.gov/19154415/	Overexpression of protease inhibitor-dead secretory leukocyte protease inhibitor causes more aggressive ovarian cancer in vitro and in vivo.
		Related	37	immunoreactivity	COEXISTS_WITH	Familial Alzheimer Disease (FAD)	https://pubmed.ncbi.nlm.nih.gov/15350971/	Relative intensity measurements of neuronal 8OHG immunoreactivity showed that there was a significant increase in FAD compared with controls (n = 15, age 59-81 years), while there was no difference in relative 8OHG between the PS-1 and the AbetaPP FAD.
		Unrelated	38	G-33040	ASSOCIATED_WITH	Mental Depression	https://pubmed.ncbi.nlm.nih.gov/13965757/	The effects of G-33040 in depressive states: a multi-blind study.
		Related	39	Amyloid beta-Peptides	CAUSES	Familial Alzheimer Disease (FAD)	https://pubmed.ncbi.nlm.nih.gov/9562460/	The significance of amyloid beta protein, especially those ending at the 42nd residue (Abeta42), in the pathogenesis of familial Alzheimer's disease (FAD) linked to the mutations of presenilins, was examined by transfection studies using cultured cells and immunohistochemical analysis of autopsied brains.
		Unrelated	40	sophocarpine	ASSOCIATED_WITH	vascular inflammations	https://www.ncbi.nlm.nih.gov/pmc/articles/PMC8625628/	In summary, these findings suggest a protective role of SPC in mediating vascular inflammation triggered by balloon injury, and support the notion that SPC exerts a promising therapeutic potential for curing restenosis in cardiovascular disease patients treated with interventional angioplasty.
		Unrelated	41	Mood Stabilizers	STIMULATES	Pena-Shokeir syndrome type I	https://www.ncbi.nlm.nih.gov/pmc/articles/PMC2952345/	This is of particular relevance because antipsychotic medications, but not mood-stabilizers (Raeder et al., 2006), up-regulate FADS1, FADS2, and SCD mRNA expression in human cell lines (Polymeropoulos et al., 2009).
		Related	42	Amyloid beta-Peptides	CAUSES	ALZHEIMER DISEASE 5	https://www.ncbi.nlm.nih.gov/pmc/articles/PMC6946617/	The deposition of beta-amyloid is an initial step in the pathogenesis of AD.5 However, the exact role of amyloid deposition and neurofibrillary tangle formation in MCI has not been studied extensively.
		Unrelated	43	Basis	ASSOCIATED_WITH	Tumor Initiation	https://www.ncbi.nlm.nih.gov/pmc/articles/PMC9351005/	Cancer stem cells (CSCs) play a decisive role in tumor initiation and growth, and they are the basis for tumor recurrence, metastasis, and chemotherapy resistance (6).
		Unrelated	44	dopamine	STIMULATES	Impulsive aggression	https://www.ncbi.nlm.nih.gov/pmc/articles/PMC2612120/	In animal studies, hyperactivity in the dopamine system is associated with increases in impulsive aggression (Harrison, Everitt, Robbins, 1997; for a review, see Netter Rammsayer, 1991).
		Related	45	tau Proteins	ASSOCIATED_WITH	Familial Alzheimer Disease (FAD)	https://pubmed.ncbi.nlm.nih.gov/19782073/	In this work, we review the links between beta amyloid peptide, tau protein and GSK3 that occur in familial Alzheimer disease.
		Related	46	tau Proteins	STIMULATES	Alzheimer's Disease	https://pubmed.ncbi.nlm.nih.gov/9147408/	Dependence of cerebrospinal fluid Tau protein levels on apolipoprotein E4 allele frequency in patients with Alzheimer's disease.
Quality score: 2 (some detail mechanisms mentioned (though does not state how phenserine affects Amyloid beta-Peptides, which is one hallmark of AD) and does make some logical inferences, but no evidence to support hypothesis)		Unrelated	47	R & C	STIMULATES	insanity	https://www.ncbi.nlm.nih.gov/pmc/articles/PMC5044409/	This affords no proof, ever, that cases of insanity do not occur among savage rc ON THE ALLEGED INCREASE OF INSANITY.
		Unrelated	48	chitosan	TREATS	tumor growth	https://www.ncbi.nlm.nih.gov/pmc/articles/PMC4197351/	Maeda and Kimura [9] investigated the antitumor effects of low-molecular-weight chitosan and reported a decline in tumor growth and final tumor weight in mice with sarcomas.
Hypothesis (using no additional information)		Related	49	Alzheimer's Disease	ASSOCIATED_WITH	acetylcholinesterase activity	https://pubmed.ncbi.nlm.nih.gov/9682012/	Lesion of the entorhinal cortex in the adult rat is a model for Alzheimer's disease and produces a marked increase in acetylcholinesterase (AChE) activity in the outer molecular layer (OML) of the dentate gyrus.
Phenserine, a reversible acetylcholinesterase inhibitor, may have potential therapeutic effects in the treatment of Alzheimer's disease through several mechanisms. The primary hypothesis is that Phenserine can increase the levels of acetylcholine, a neurotransmitter that is significantly reduced in Alzheimer's disease, by inhibiting its breakdown. This could potentially improve cognitive function…		Related	50	tau Proteins	CAUSES	Alzheimer's Disease	https://pubmed.ncbi.nlm.nih.gov/1527090/	It has been suggested that hyperphosphorylation of the tau protein in neurofibrillary tangles may be relevant to the etiology of Alzheimer's disease and that at least one of the hyperphosphorylated sites lies within a consensus sequence for the p34cdc2/cdc28 family of kinases.
		Related	51	acetylcholinesterase activity	COEXISTS_WITH	Alzheimer's Disease	https://pubmed.ncbi.nlm.nih.gov/6135930/	Decreased CSF acetylcholinesterase activity in Alzheimer's disease.
		Unrelated	52	Antitubercular Agents	TREATS	Erythropoietin-resistant anemia	https://pubmed.ncbi.nlm.nih.gov/15875624/	This study describes a haemodialysis patient who contracted tuberculous peritonitis associated with hypercalcaemia, erythropoietin-resistant anaemia and elevated CA 125, which normalised gradually following antituberculosis treatment.
		Related	53	Amyloid beta-Peptides	STIMULATES	Alzheimer's Disease	https://pubmed.ncbi.nlm.nih.gov/8761337/	Moreover, beta-amyloid was capable of inducing an AD-like phenotype for K+ channels and Cp20 in otherwise normal fibroblasts, providing additional evidence for the potential involvement of these components in AD and suggesting a possible pathological consequence of soluble beta-amyloid elevation in AD.
		Related	54	Amyloid beta-Peptides	ASSOCIATED_WITH	Alzheimer's Disease	https://pubmed.ncbi.nlm.nih.gov/3555492/	The mouse homolog of the human amyloid beta protein (AD-AP) gene is located on the distal end of mouse chromosome 16: further extension of the homology between human chromosome 21 and mouse chromosome 16.
		Related	55	phenserine	STIMULATES	immunoreactivity	https://www.ncbi.nlm.nih.gov/pmc/articles/PMC3559887/	Systemic administration of (+)-phenserine significantly increased the DCX immunoreactivity within the SVZ of both wt and AD Tg2576 mice by two- to three-fold (Fig. 5A,B).10.1371/journal.pone.0054887.g005Figure 5Enhanced doublecortin reactivity in the SVZ of 4 6 months old APPswe mice after (+)-phenserine treatment.
		Related	56	immunoreactivity	COEXISTS_WITH	Alzheimer's Disease	https://pubmed.ncbi.nlm.nih.gov/2868073/	Somatostatin immunoreactivity in cortical and some subcortical regions in Alzheimer's disease.
		Unrelated	57	New medications	STIMULATES	Lymphoma	https://www.ncbi.nlm.nih.gov/pmc/articles/PMC3393342/	Therefore, it is important to develop new drugs to decrease radio-resistance or increase radiosensitivity in these lymphomas.
		Related	58	Amyloid beta-Peptides	ASSOCIATED_WITH	Alzheimer Disease 12	https://www.ncbi.nlm.nih.gov/pmc/articles/PMC2773287/	It is hypothesized that high concentrations of glutamate cause an excess calcium influx through the ion channel that leads to excitotoxicity.10 It has been shown in AD patients that glutamate transporters in glial cells are reduced, while the presence of beta amyloid indirectly stimulates excessive glutamate production.11 This phenomenon is thought to contribute to the neurotoxicity of beta amylo…
		Unrelated	59	H7 hemagglutinin	ASSOCIATED_WITH	Pneumonia	https://www.ncbi.nlm.nih.gov/pmc/articles/PMC6746284/	These data show that a multibasic cleavage site in H7 hemagglutinin combined with the HA mutations HA I111T and A146S mediate severe pneumonia in mice.
		Related	60	Microhemorrhage	COEXISTS_WITH	Alzheimer's Disease	https://pubmed.ncbi.nlm.nih.gov/21392891/	CAA and cerebral microhemorrhages in AD have similar spatial distribution of lobar predominance, and their accumulation similarly affect cognitive function.
		Unrelated	61	Insulin-Like Growth-Factor-Binding Proteins	CAUSES	tumor growth	https://www.ncbi.nlm.nih.gov/pmc/articles/PMC6272898/	Furthermore, the induction of insulin-like growth factor binding proteins (IGFBP) through regulation of inflammatory pathways could result in lowered tumor growth.
Quality score: 2 (does make logical inferences and states some detail mechanisms that would be beneficial in AD, but no evidence given to support the hypothesis)		Unrelated	62	Steroids	ASSOCIATED_WITH	Chronic Condition	https://www.ncbi.nlm.nih.gov/pmc/articles/PMC4963393/	The overall small number of participants and especially the small number of control patients, the possible participation of patients with steroid-responsive chronic conditions, the outcome measure of extubation rather than ventilator-free days, and the lack of utility of LIS as an outcome measure (24) could all be addressed in a future trial.
		Unrelated	63	rituximab	ASSOCIATED_WITH	gastritis h pylori	https://www.ncbi.nlm.nih.gov/pmc/articles/PMC8491302/	Histological assessments have also suggested that t(11;18)(q21;q21) and nuclear BCL10 overexpression are detected at higher numbers in H. pylori negative than in H. pylori positive gastric MALT lymphoma patients.52,54 Routine assessment before initiation of therapy is nevertheless not recommended, as also patients testing positive for this translocation might respond to antibiotics, and no influe…
(Highlight in red: incorrect citations)		Unrelated	64	Tobacco	ASSOCIATED_WITH	Upper gastrointestinal symptoms	https://pubmed.ncbi.nlm.nih.gov/20668918/	The authors aimed to investigate whether the exposure to different forms of tobacco influences upper gastrointestinal symptoms, histology and frequency of Helicobacter pylori infection.
		Unrelated	65	B-Cell Leukemia 2 Family Proteins	ASSOCIATED_WITH	Cerebral Infarction	https://pubmed.ncbi.nlm.nih.gov/34023410/	This study showed that retinoic acid regulates bcl-2 family proteins and caspase proteins in focal cerebral ischemia.
		Unrelated	66	lipid mediator	ASSOCIATED_WITH	Leishmaniasis, Cutaneous	https://www.ncbi.nlm.nih.gov/pmc/articles/PMC7721649/	Regardless, our data reveal that a biosignature enriched in lipid mediators is able to reliably predict treatment outcomes in CL, and the markers contributing to such signature may serve as targets in a potential host-directed therapy.
		Unrelated	67	lactase	TREATS	Lactose intolerant	https://pubmed.ncbi.nlm.nih.gov/20391953/	The effect of oral supplementation with Lactobacillus reuteri or tilactase in lactose intolerant patients: randomized trial.
		Related	68	Amyloid beta-Peptides	ASSOCIATED_WITH	Alzheimer Disease, Late Onset	https://pubmed.ncbi.nlm.nih.gov/14692704/	The present study was carried out to examine the coincidence of these small vessel pathologies during the development of cognitive deficits, amyloid beta-protein (A beta) deposition, and neurofibrillary tangle (NFT) formation in sporadic late-onset AD.
		Related	69	Alzheimer's Disease	ASSOCIATED_WITH	Protein Biosynthesis	https://www.ncbi.nlm.nih.gov/pmc/articles/PMC2812480/	The increased interest is due to the identification of oxidized RNA species present in brain tissue affected by neurological disorders such as Alzheimer s disease (AD) and the possibility of RNA as a therapeutic drug target.1-3,18-24 Recently, lipid peroxidation and oxidation of proteins, DNA and RNA has been found in the vulnerable regions of the brains of patients with AD and mild cognitive imp…
		Unrelated	70	abatacept	CAUSES	tumor growth	https://www.ncbi.nlm.nih.gov/pmc/articles/PMC4886225/	As evidenced by the success of ipilimumab in the treatment of melanoma, alterations in the pathway can have significant effects on tumor immunity.18 In the case of abatacept, loss of costimulatory effects to cytotoxic T cells may be altering the effect on immune surveillance and hence promoting tumor growth.
		Unrelated	71	Human papillomavirus DNA	ASSOCIATED_WITH	Precancerous lesion	https://pubmed.ncbi.nlm.nih.gov/2543717/	[In situ hybridization study on the localization of HPV DNA in the precancerous lesions of uterine cervix].
		Unrelated	72	Endostatin, human	INHIBITS	tumor growth	https://www.ncbi.nlm.nih.gov/pmc/articles/PMC3154123/	Previous studies show that human endostatin inhibits tumor neovascular growth by suppressing VEGF expression [44,45].
		Unrelated	73	potash	ASSOCIATED_WITH	Mitral disease	https://www.ncbi.nlm.nih.gov/pmc/articles/PMC5186909/	Now digitalis itself is a diuretic, but it is usually given with drugs such as acetate of potash, scoparia, c., which cause diuresis without acting on the heart ; so when- ever these drugs are being given, the urine, instead of being scanty and dark as it is in mitral disease, should become abundant and pale ; and if this do not occur, the fact should be reported.
		Related	74	Amyloid beta-Peptides	ASSOCIATED_WITH	Alzheimer Disease, Early Onset	https://pubmed.ncbi.nlm.nih.gov/7998778/	Amyloid beta protein levels in cerebrospinal fluid are elevated in early-onset Alzheimer's disease.
		Related	75	Amyloid beta-Peptides	INHIBITS	Alzheimer's Disease	https://pubmed.ncbi.nlm.nih.gov/19723623/	Therefore, the inhibitory effect of PEDF appears to be mediated via the processing of VEGF-R2 by gamma-secretase. gamma-Secretase generates the amyloid-beta (Abeta) peptide of Alzheimer disease from its precursor (amyloid precursor protein).
		Unrelated	76	secreted frizzled related protein 1	CAUSES	Secondary Neoplasm	https://www.ncbi.nlm.nih.gov/pmc/articles/PMC5987752/	Numerous signaling pathways are deregulated during the initiation and progression of HCC, including Wnt/ -catenin, JAK/STAT, PI3K/Akt/mTOR, Ras/Raf/MEK/ERK, as well as Hedgehog pathways.32 It is reported that miR-27a promoted gastric cancer cell metastasis by activating Wnt/ -catenin signaling pathway33 and miR-27a regulated Wnt/ -catenin signaling through directly targeting SFRP1 in glioma.24 SF…
		Related	77	Amyloid beta-Peptides	ASSOCIATED_WITH	Familial Alzheimer Disease (FAD)	https://pubmed.ncbi.nlm.nih.gov/1465129/	Mutation of the beta-amyloid precursor protein in familial Alzheimer's disease increases beta-protein production.
		Unrelated	78	Basis	TREATS	Systemic involvement of connective tissue, unspecified	https://pubmed.ncbi.nlm.nih.gov/10437425/	[Disease-modifying drugs as a basis of therapy of systemic connective tissue diseases--special part].
		Related	79	Alzheimer's Disease	PRODUCES	tau Proteins	https://pubmed.ncbi.nlm.nih.gov/24059239/	The two molecular hallmarks of AD are amyloid plaques created from an amyloid precursor protein and hyperphosphorylated tau protein that is deposited as neurofibrillary tangles inside neurons.
		Related	80	Amyloid beta-Peptides	ASSOCIATED_WITH	Alzheimer Disease 11	https://www.ncbi.nlm.nih.gov/pmc/articles/PMC4040417/	Impaired mitochondrial protein import due to the amyloid beta peptide (A ) has been observed in Alzheimer s disease (AD)11, suggesting that mutant htt may cause a similar dysfunction in yeast.
		Unrelated	81	STEP 2	TREATS	CRANIOMETAPHYSEAL DYSPLASIA, AUTOSOMAL DOMINANT	https://www.ncbi.nlm.nih.gov/pmc/articles/PMC9226877/	Its pathways involve a stepped care model, providing steps 2 and 3 of the NICE five-step approach to the treatment of CMD.
		Unrelated	82	IV epoprostenol	TREATS	Eisenmenger Complex	https://pubmed.ncbi.nlm.nih.gov/12970054/	Although pregnancy should be discouraged in women with Eisenmenger syndrome, we have demonstrated that IV epoprostenol successfully treated a woman with Eisenmenger syndrome diagnosed in the third trimester.
		Related	83	Amyloid beta-Peptides	CAUSES	Alzheimer Disease 7	https://www.ncbi.nlm.nih.gov/pmc/articles/PMC2723955/	The techniques were applied to the detection of amyloid-beta derived diffusible ligands (ADDLs) which play an important role in the molecular pathogenesis of Alzheimer s Disease.7
		Unrelated	84	Topical Product	TREATS	Chloasma	https://pubmed.ncbi.nlm.nih.gov/33026755/	Randomized, Double-Blinded, Split-Face Study Comparing the Efficacy and Tolerability of Two Topical Products for Melasma.
		Related	85	phenserine	ASSOCIATED_WITH	Protein Biosynthesis	https://www.ncbi.nlm.nih.gov/pmc/articles/PMC3226276/	Both the (-)- and the (+)-enantiomer of phenserine are equipotent in dose-dependent and time-dependent negative regulation of APP mRNA translation, but (+)-phenserine (posiphen) is inactive as an acetylcholinesterase inhibitor and therefore may be administered at higher doses [8].In a phase IIb study in 20 patients with mild AD, phenserine 30 mg/day reduced cerebrospinal fluid (CSF) levels of A a…
		Related	86	phenserine	INHIBITS	acetylcholinesterase activity	https://pubmed.ncbi.nlm.nih.gov/22831800/	The bulkiness of the substituent at 3a-position of phenserine derivatives tends to reduce the inhibitory effect on AChE activity in the following order: methyl > ethyl > vinyl > propyl ~ allyl > reverse-prenyl groups.
		Related	87	Amyloid beta-Peptides	ASSOCIATED_WITH	Alzheimer Disease 9	https://www.ncbi.nlm.nih.gov/pmc/articles/PMC3622466/	Cognition and its decline associated with brain aging also seems to be variable and possibly open to modifications.1 Studies in humans and animal models suggest that age-related cognitive decline is more likely to be associated with alterations in synaptic connectivity than with neuronal loss and white matter changes.6,7 According to recent studies, alterations of intracellular -secretase mediate…
		Related	88	phenserine	INHIBITS	Alzheimer's Disease	https://pubmed.ncbi.nlm.nih.gov/24955574/	(-)-Phenserine is a reversible AChE inhibitor possessing neuroprotective and amyloid precursor protein lowering actions that reached Phase III clinical trials for Alzheimer's Disease where it exhibited a wide safety margin.
		Related	89	immunoreactivity	COEXISTS_WITH	Alzheimer Disease 11	https://www.ncbi.nlm.nih.gov/pmc/articles/PMC4577022/	Equally important, all components of the classical IL-6 signaling pathway (IL-6, its membrane-bound receptor (IL-6R), and the signal-transducing component gp130) are detectable in the brain, with evidence of altered cortical immunoreactivity of the functional IL-6R complex in AD11.
		Unrelated	90	fruit extracts	ASSOCIATED_WITH	Gastric ulcer	https://www.ncbi.nlm.nih.gov/pmc/articles/PMC3770045/	However, there is a report on exacerbation of gastric ulcer by fruit polyphenol extract [27].2.7.
		Unrelated	91	Mood Stabilizers	TREATS	Impulsive Behavior	https://www.ncbi.nlm.nih.gov/pmc/articles/PMC3801150/	In addition, it could be also relevant to measure the role of other pharmacological treatments, such as mood stabilizers to treat impulsivity and risky behaviors in CDI + ADHD, CDI, and in other addicted patients (59 61).
		Related	92	tau Proteins	INHIBITS	Alzheimer's Disease	https://pubmed.ncbi.nlm.nih.gov/17721707/	Furthermore, total tau protein levels were slightly decreased in both FTLD and AD as compared to control subjects.

## Sheet: Latrepirdine
Hypothesis (using supporting sentences)		(Un)Related	Ref	Subject Entity Name	Relation type	Object Entity Name	URL	Sentence
Based on the evidence provided, we hypothesize that latrepirdine may treat Alzheimer's disease (AD) through multiple mechanisms. Firstly, latrepirdine has been shown to stimulate amyloid precursor protein (APP) catabolism and amyloid-beta (Aβ) secretion, which could potentially reduce the accumulation of Aβ, a key pathological feature of AD [13, 9, 29]. Secondly, latrepirdine may protect mitochon…		Related	1	Alzheimer's Disease	ASSOCIATED_WITH	cathepsin D activity	https://www.ncbi.nlm.nih.gov/pmc/articles/PMC4113944/	Although some reports have shown that cathepsin D activities were decreased in AD (Lee et al., 2010b), many studies indicate that cathepsin D is elevated in AD and contributes to the pathogenesis, such as A formation (Cataldo et al., 2004; Lai and McLaurin, 2012; Zhou et al., 2012).
		Unrelated	2	rituximab	ASSOCIATED_WITH	Treatment Resistant Disorders	https://pubmed.ncbi.nlm.nih.gov/18270859/	Rituximab in treatment-resistant autoimmune blistering skin disorders.
		Related	3	latrepirdine	STIMULATES	cathepsin D activity	https://www.ncbi.nlm.nih.gov/pmc/articles/PMC8229105/	Eight lysosomotropic drugs (chloroquine, fluoxetine, imipramine, latrepirdine, tamoxifen, chlorpromazine, amitriptyline, and verapamil) were shown to increase cathepsin D activity at multiple concentrations after 24-h exposure [92].
		Unrelated	4	Hypoxia-Inducible Factor 1	ASSOCIATED_WITH	SCLEROSING CHOLANGITIS, NEONATAL	https://www.ncbi.nlm.nih.gov/pmc/articles/PMC4559269/	Although previous studies have indicated that HIF-1 potentiates Notch signaling in embryonic NSCs, P19 carcinoma [28] and med-uloblastoma precursors [94], this has not been studied extensively in postnatal NSPCs, and the subset of Notch target genes regulated by HIF-1 potentiation have not been elucidated.
		Related	5	Amyloid beta-Peptides	CAUSES	Alzheimer Disease, Early Onset	https://pubmed.ncbi.nlm.nih.gov/10230703/	Genetic studies on some families have shown that mutations in the genes encoding beta-amyloid precursor protein and presenilins 1 and 2 are responsible for early-onset AD.
		Unrelated	6	CXC Chemokines	INHIBITS	tumor growth	https://pubmed.ncbi.nlm.nih.gov/10380932/	A synthetic peptide inhibitor for alpha-chemokines inhibits the tumour growth and pulmonary metastasis of human melanoma cells in nude mice.
		Unrelated	7	Nuclease Sensitive Element Binding Protein 1	ASSOCIATED_WITH	tumor growth	https://www.ncbi.nlm.nih.gov/pmc/articles/PMC3182772/	Moreover, substantial evidence has demonstrated the oncogenic role of ILK, reflected in the term of ILK addiction 40 in many types of cancers.16 22 Equally important, the ILK inhibitor 54 provides a proof-of-concept that ILK kinase activity can be targeted to suppress tumor cell growth via inhibition of signaling pathways mediated by Akt and YB-1.27, 28, 40 However, as recent reports indicate tha…
		Related	8	latrepirdine	ASSOCIATED_WITH	Alzheimer's Disease	https://www.ncbi.nlm.nih.gov/pmc/articles/PMC2577671/	Despite extremely encouraging results in clinical trials, the mechanisms responsible for beneficial actions of Dimebon in AD and HD remain poorly understood.
		Related	9	Amyloid beta-Peptides	ASSOCIATED_WITH	Alzheimer disease, familial, type 3	https://www.ncbi.nlm.nih.gov/pmc/articles/PMC8476544/	Although the physiological relevance of the fragments generated is not fully understood, one of these, the amyloid-beta peptide (A ) originating from the transmembrane domain of the APP protein, is the main component of brain amyloid plaques in Alzheimer s disease (AD)3,4.
		Related	10	Amyloid beta-Peptides	COMPLICATES	Alzheimer's Disease	https://www.ncbi.nlm.nih.gov/pmc/articles/PMC7388140/	Elevated cortisol levels and HPA axis dysfunction are implicated in chronic stress, which releases amyloid beta (A ) that causes and/or worsens AD (109).
		Related	11	Amyloid beta-Peptides	ASSOCIATED_WITH	Alzheimer Disease 11	https://www.ncbi.nlm.nih.gov/pmc/articles/PMC4040417/	Impaired mitochondrial protein import due to the amyloid beta peptide (A ) has been observed in Alzheimer s disease (AD)11, suggesting that mutant htt may cause a similar dysfunction in yeast.
		Unrelated	12	pegvisomant	TREATS	tumor growth	https://pubmed.ncbi.nlm.nih.gov/20887124/	Thus far, tumor growth has not been a concern during pegvisomant therapy.
		Related	13	latrepirdine	STIMULATES	amyloid precursor protein catabolic process	https://www.ncbi.nlm.nih.gov/pmc/articles/PMC3625697/	We reported that latrepirdine stimulates APP catabolism and A secretion10, an unexpected result for a drug that was claimed to benefit AD.
		Unrelated	14	cholinergic system	CAUSES	Asthma	https://pubmed.ncbi.nlm.nih.gov/10487361/	An abnormal cholinergic system may therefore contribute to both MCS and asthma.
		Unrelated	15	EPI-589	TREATS	Amyotrophic Lateral Sclerosis	https://pubmed.ncbi.nlm.nih.gov/35988057/	Given the effects of EPI-589 on oxidative stress and mitochondrial dysfunction, EPI-589 shows promise as a potential therapy for patients with amyotrophic lateral sclerosis.
Quality score: 4 (many logical inferences and mentions some detail mechanisms)		Unrelated	16	prednisolone	INHIBITS	mass lesion	https://www.ncbi.nlm.nih.gov/pmc/articles/PMC3576552/	In general, the aim of conservative therapy of rheumatoid nodules with local injection of prednisolone in the lesions is a reduction of the lesion masses and the inflammatory process.
		Related	17	Amyloid beta-Peptides	ASSOCIATED_WITH	Familial Alzheimer Disease (FAD)	https://pubmed.ncbi.nlm.nih.gov/1465129/	Mutation of the beta-amyloid precursor protein in familial Alzheimer's disease increases beta-protein production.
Hypothesis (using supporting sentences and unrelated sentences)		Related	18	tau Proteins	ASSOCIATED_WITH	Familial Alzheimer Disease (FAD)	https://pubmed.ncbi.nlm.nih.gov/19782073/	In this work, we review the links between beta amyloid peptide, tau protein and GSK3 that occur in familial Alzheimer disease.
Based on the evidence provided, we hypothesize that latrepirdine may exert therapeutic effects in Alzheimer's disease (AD) through multiple mechanisms. Firstly, latrepirdine has been shown to increase cathepsin D activity [3], which is often elevated in AD and contributes to its pathogenesis [1]. This suggests that latrepirdine may modulate the activity of cathepsin D, potentially reducing the fo…		Unrelated	19	Plasminogen Activator Inhibitor 1	CAUSES	Aneurysmal disease	https://www.ncbi.nlm.nih.gov/pmc/articles/PMC4013441/	Another fibrinolytic gene which we have studied regarding to its contribution to the aneurysm disease is plasminogen activator inhibitor 1.
		Unrelated	20	Interleukin-24	ASSOCIATED_WITH	early pregnancy	https://pubmed.ncbi.nlm.nih.gov/30903677/	Decidual stromal cells promote the differentiation of CD56bright CD16- NK cells by secreting IL-24 in early pregnancy.
		Related	21	Amyloid beta-Peptides	CAUSES	Alzheimer Disease 7	https://www.ncbi.nlm.nih.gov/pmc/articles/PMC2723955/	The techniques were applied to the detection of amyloid-beta derived diffusible ligands (ADDLs) which play an important role in the molecular pathogenesis of Alzheimer s Disease.7
		Related	22	Amyloid beta-Peptides	ASSOCIATED_WITH	ALZHEIMER DISEASE 18	https://www.ncbi.nlm.nih.gov/pmc/articles/PMC7864928/	Considering the potential functions of the PVS system, studies had proved that the PVS waste drainage system contributed to a larger portion of interstitial solutes clearance, such as amyloid beta (A ), preventing A deposition that was thought to be pathogenic in AD18,22.
		Unrelated	23	Sodium-Glucose Transporter 2 Inhibitors	INHIBITS	cardiac event	https://www.ncbi.nlm.nih.gov/pmc/articles/PMC6014462/	Various possible mechanisms by which an SGLT2 inhibitor reduces the incidence of heart failure and other cardiac events in diabetic patients have been proposed.
		Related	24	tau Proteins	STIMULATES	Alzheimer's Disease	https://pubmed.ncbi.nlm.nih.gov/9147408/	Dependence of cerebrospinal fluid Tau protein levels on apolipoprotein E4 allele frequency in patients with Alzheimer's disease.
		Related	25	Amyloid beta-Peptides	ASSOCIATED_WITH	Alzheimer Disease 9	https://www.ncbi.nlm.nih.gov/pmc/articles/PMC3622466/	Cognition and its decline associated with brain aging also seems to be variable and possibly open to modifications.1 Studies in humans and animal models suggest that age-related cognitive decline is more likely to be associated with alterations in synaptic connectivity than with neuronal loss and white matter changes.6,7 According to recent studies, alterations of intracellular -secretase mediate…
		Related	26	Amyloid beta-Peptides	ASSOCIATED_WITH	Alzheimer Disease 12	https://www.ncbi.nlm.nih.gov/pmc/articles/PMC2773287/	It is hypothesized that high concentrations of glutamate cause an excess calcium influx through the ion channel that leads to excitotoxicity.10 It has been shown in AD patients that glutamate transporters in glial cells are reduced, while the presence of beta amyloid indirectly stimulates excessive glutamate production.11 This phenomenon is thought to contribute to the neurotoxicity of beta amylo…
		Related	27	Amyloid beta-Peptides	CAUSES	Alzheimer Disease, Late Onset	https://www.ncbi.nlm.nih.gov/pmc/articles/PMC4045094/	In this study, we investigate the influence of interactions between genes previously associated with Alzheimer s Disease (AD) on amyloid-beta (A ) load in an effort to better understand the genetic etiology of A deposition and, by extension, risk for LOAD.
		Related	28	latrepirdine	ASSOCIATED_WITH	receptor activity	https://www.ncbi.nlm.nih.gov/pmc/articles/PMC4030329/	As described above latrepirdine can modulate receptor activity, protect mitochondrial function, modulate intracellular catabolic pathways and reduce amyloid aggregates and pathology in cellular and neurodegenerative mice models (Table 2).
		Related	29	latrepirdine	STIMULATES	Amyloid beta-Peptides	https://pubmed.ncbi.nlm.nih.gov/20017949/	Acute dosing of latrepirdine (Dimebon), a possible Alzheimer therapeutic, elevates extracellular amyloid-beta levels in vitro and in vivo.
		Unrelated	30	4-nitrophenol	ASSOCIATED_WITH	early pregnancy	https://www.ncbi.nlm.nih.gov/pmc/articles/PMC6863610/	With respect to associations with birth outcomes and child growth, higher concentrations of 4-nitrophenol in early pregnancy (<16 weeks gestation) were associated with an increased risk of preterm delivery and small for gestational age, and higher concentrations of IMPY were associated with increased risk of low birth weight.
		Related	31	Alzheimer's Disease	PRODUCES	tau Proteins	https://pubmed.ncbi.nlm.nih.gov/24059239/	The two molecular hallmarks of AD are amyloid plaques created from an amyloid precursor protein and hyperphosphorylated tau protein that is deposited as neurofibrillary tangles inside neurons.
		Related	32	latrepirdine	ASSOCIATED_WITH	Oxidative Phosphorylation	https://www.ncbi.nlm.nih.gov/pmc/articles/PMC6065284/	These findings fit nicely into our findings about effects of dimebon on oxidative phosphorylation activity in HEK cells [36].
		Unrelated	33	Endothelial antibody	INHIBITS	tumor growth	https://www.ncbi.nlm.nih.gov/pmc/articles/PMC8917395/	While mice deficient in ELTD1 are healthy and lack vascular defects, the VEGF pathway is important for vascular homeostasis and endothelial cell survival.30 ELTD1-targeting antibodies have been demonstrated to reduce tumor growth in glioma models.13 15 However, the underlying mechanisms are unclear since these antibodies also bound to the glioma cells rather than specifically to the vessels, sugg…
Quality score: 3 (although some of the mechanisms addressed state the benefits in AD, a particular mechanism (latrepirdine increases cathepsin D activity; cathepsin D may be elevated in AD, leading to Abeta formation) may lead to increased Abeta formation)		Related	34	Phosphorylation	COEXISTS_WITH	Alzheimer Disease 13	https://www.ncbi.nlm.nih.gov/pmc/articles/PMC8935215/	For example, miR-326 has been shown to decrease tau phosphorylation and neuronal apoptosis in AD 13.
		Related	35	Oxidative Phosphorylation	COEXISTS_WITH	Alzheimer's Disease	https://pubmed.ncbi.nlm.nih.gov/1528007/	Deficiencies in mitochondrial oxidative phosphorylation enzymes have been observed in several common neurodegenerative diseases such as Alzheimer and Parkinson diseases.
Hypothesis (using relations and unrelated relations)		Related	36	Alzheimer's Disease	ASSOCIATED_WITH	amyloid precursor protein catabolic process	https://www.ncbi.nlm.nih.gov/pmc/articles/PMC2693334/	Thus, it is unclear how Mint/X11s affect APP cleavage and A -production physiologically, and whether their function may be involved in the pathogenesis of AD.
Based on the provided evidence, it can be hypothesized that latrepirdine may exert its therapeutic effects in Alzheimer's disease through multiple mechanisms. Firstly, latrepirdine has been shown to stimulate cathepsin D activity [3], which is associated with Alzheimer's disease [1]. This suggests that latrepirdine may enhance the degradation of amyloid precursor protein, a process that is known …		Unrelated	37	Vascular Cell Adhesion Molecule-1	CAUSES	Lupus renal disease NOS	https://www.ncbi.nlm.nih.gov/pmc/articles/PMC9204340/	Urine VCAM-1 was highly predictive of SLE disease activity (when compared with inactive SLE, AUC 0.81) and more specifically with LN disease activity (when compared with active non-renal SLE patients, AUC 0.88).
		Unrelated	38	HYPOTRICHOSIS 1	PRODUCES	citrate carrier	https://www.ncbi.nlm.nih.gov/pmc/articles/PMC5875562/	As a consequence of mechanistically coupled Hh cholesteroylation/autoprocessing, Hhs are the only known proteins secreted as C-cholesteroylated 19 kDa proteins, and mutations that prevent this reaction result in severe developmental defects [26,32].
		Unrelated	39	phenobarbital	INHIBITS	tumor growth	https://pubmed.ncbi.nlm.nih.gov/16188247/	AIM: The methanolic extract of Solanum trilobatum (ST) is cytotoxic and exerts an inhibitory effect on tumor growth and in the present study, its role on the antioxidant status of N-diethylnitrosamine (DEN) induced and phenobarbital (PB) promoted hepatocarcinogenesis was assessed.
		Related	40	amyloid precursor protein catabolic process	COEXISTS_WITH	Alzheimer Disease, Late Onset	https://www.ncbi.nlm.nih.gov/pmc/articles/PMC8597077/	7 , 10 Although for a long time the A pathway did not emerge in our genome wide association studies (GWAS) of AD, 11 our most recent GWAS study highlighted the A processing pathway and APP catabolic process pathway in late onset Alzheimer's disease (LOAD).
		Unrelated	41	Abraxane	TREATS	tumor vasculature	https://www.ncbi.nlm.nih.gov/pmc/articles/PMC3184245/	With the same tumor model, we have found that only murine integrin expression on tumor vasculature is down-regulated after treatment with Abraxane, but that on tumor cells it is almost unaffected [46].
		Related	42	Protein phosphorylation	COEXISTS_WITH	Alzheimer's Disease	https://pubmed.ncbi.nlm.nih.gov/2690121/	Aberrant protein phosphorylation and cytoarchitecture in Alzheimer's disease.
		Related	43	cathepsin D activity	COEXISTS_WITH	Alzheimer's Disease	https://pubmed.ncbi.nlm.nih.gov/8887936/	Cortical cathepsin D activity and immunolocalization in Alzheimer disease, critical coronary artery disease, and aging.
		Unrelated	44	Cilengitide	TREATS	androgen independent prostate cancer	https://pubmed.ncbi.nlm.nih.gov/16729916/	Phase II evaluations of cilengitide in asymptomatic patients with androgen-independent prostate cancer: scientific rationale and study design.
		Unrelated	45	New medications	TREATS	Filariasis	https://pubmed.ncbi.nlm.nih.gov/3079315/	We believe that parasite antigen detection represents a valuable new approach for monitoring the efficacy of antifilarial drug therapy which we hope will lead to improved use of existing drugs and aid in the evaluation of new drugs for filariasis.
		Unrelated	46	CALCIUM HOMEOSTASIS	ASSOCIATED_WITH	Ventricular arrhythmia	https://www.ncbi.nlm.nih.gov/pmc/articles/PMC5855755/	Disruption of calcium homeostasis is involved in the pathogenesis of ventricular arrhythmias.
		Related	47	Alzheimer's Disease	ASSOCIATED_WITH	Protein phosphorylation	https://www.ncbi.nlm.nih.gov/pmc/articles/PMC4939282/	Accordingly, aberrant protein phosphorylation is involved in many human diseases, such as Alzheimer s disease [2,3], cancer [4 6], cardiovascular disease [7 9], as well as diabetes [10 12].
		Related	48	Phosphorylation	COEXISTS_WITH	Alzheimer Disease 11	https://www.ncbi.nlm.nih.gov/pmc/articles/PMC8595611/	Thus, tau phosphorylation and spreading may represent ideal therapeutic targets in AD11, 12, while tau-related outcome measures may be generally useful for trials of potential disease-modifying therapies.
		Unrelated	49	albiglutide	ASSOCIATED_WITH	Hepatic impairment	https://www.ncbi.nlm.nih.gov/pmc/articles/PMC9287213/	Some other incretins, namely, albiglutide and lixisenatide [6, 7], have not been included in hepatic impairment studies because, based on known metabolism pathways, it is expected that these peptide drugs would be broken down into smaller fragments by proteolytic enzymes, and thus there was no expectation for their PK to be influenced by hepatic impairment.
		Unrelated	50	release factor	ASSOCIATED_WITH	Tumor Cell Invasion	https://www.ncbi.nlm.nih.gov/pmc/articles/PMC4427118/	Pericytes may act as a physical barrier that makes the extravasation of tumor cells into the vessel lumen difficult and/or may actively promote metastasis by releasing factors that affect tumor invasion.
		Related	51	Amyloid beta-Peptides	INHIBITS	Alzheimer's Disease	https://pubmed.ncbi.nlm.nih.gov/19723623/	Therefore, the inhibitory effect of PEDF appears to be mediated via the processing of VEGF-R2 by gamma-secretase. gamma-Secretase generates the amyloid-beta (Abeta) peptide of Alzheimer disease from its precursor (amyloid precursor protein).
Quality score: 2 (states that AD coexists/is associated with amyloid precursor protein catabolic process, which is not true)		Unrelated	52	Oxidopamine	TREATS	SCLEROSING CHOLANGITIS, NEONATAL	https://www.ncbi.nlm.nih.gov/pmc/articles/PMC8419519/	After the third passage, the cells should be cultured with STEMdiff Neural Progenitor Medium (Stemcell Technologies) to maintain NSC growth.To mimic neuronal damage in vitro, NSCs were treated with 6-OHDA at 30, 50, and 75 M for 24 h and subsequently collected for microRNA expression analysis.
		Unrelated	53	Dihydroxycholecalciferols	INHIBITS	tumor growth	https://pubmed.ncbi.nlm.nih.gov/11384862/	Studies of the effects of 1,25-dihydroxyvitamin D on skeletal and calcium homeostasis and on inhibition of tumor cell growth.
Hypothesis (using no additional information)		Related	54	Alzheimer's Disease	ASSOCIATED_WITH	Phosphorylation	https://pubmed.ncbi.nlm.nih.gov/8746795/	Abnormal phosphorylation by PKC as well as reduced levels of PKC has been implicated in the neurodegeneration associated with AD and aging.
Latrepirdine, also known as Dimebon, has been proposed as a potential treatment for Alzheimer's disease due to its multifaceted mechanism of action. The hypothesis is that Latrepirdine may exert its therapeutic effects through several pathways that are crucial in Alzheimer's disease pathology. Firstly, it may enhance mitochondrial function and protect neurons from apoptosis, which is a significan…		Related	55	Amyloid beta-Peptides	ASSOCIATED_WITH	Alzheimer Disease 7	https://www.ncbi.nlm.nih.gov/pmc/articles/PMC7989959/	Aggregation and misfolding of amyloid-beta (A ) is a potential mechanism in AD patients.7 A monomers assemble into A O (A oligomers) and fibrils and are then distributed into the circulating blood or cerebrospinal fluid (CSF).1 The A O is neurotoxic and is highly correlated with severe AD.
		Unrelated	56	New medications	TREATS	Myocardial Infarction	https://www.ncbi.nlm.nih.gov/pmc/articles/PMC5421030/	New, effective drugs have been introduced for the treatment of heart failure, hyperlipidaemia, vascular disease, heart attacks, gastrointestinal bleeding, anaemia, osteoporosis, depression and other diseases common in old age.
		Unrelated	57	Antithrombotic Agents	TREATS	Portal Vein Thrombosis	https://www.ncbi.nlm.nih.gov/pmc/articles/PMC8252415/	Acute symptomatic PVT should be treated with antithrombotic agents in a timely fashion to recanalize the portal vein and prevent thrombus extension.
		Unrelated	58	barberry extract	TREATS	Malignant Neoplasms	https://pubmed.ncbi.nlm.nih.gov/28558642/	Berberis vulgaris is used as a traditional medicine in cancer.
		Related	59	Amyloid beta-Peptides	ASSOCIATED_WITH	Alzheimer Disease, Early Onset	https://pubmed.ncbi.nlm.nih.gov/7998778/	Amyloid beta protein levels in cerebrospinal fluid are elevated in early-onset Alzheimer's disease.
		Related	60	Alzheimer's Disease	ASSOCIATED_WITH	receptor activity	https://www.ncbi.nlm.nih.gov/pmc/articles/PMC1563968/	Food and Drug Administration (FDA) for moderate to severe AD, has been shown to regulate receptor activity affecting the neurotransmitter glutamate, which is also implicated in AD (75).
		Unrelated	61	diclofenac	TREATS	Corneal melt	https://pubmed.ncbi.nlm.nih.gov/12648633/	To describe the histopathology of the cornea in 3 cases of corneal melting associated with diclofenac therapy after refractive surgery procedures.
		Unrelated	62	Carcinoembryonic Antigen	INHIBITS	postoperative stroke	https://pubmed.ncbi.nlm.nih.gov/12832994/	Our results suggest that combined OPCAB/CEA is safe and may reduce the risk of postoperative stroke.
		Unrelated	63	New medications	TREATS	Lung Diseases, Interstitial	https://pubmed.ncbi.nlm.nih.gov/19634085/	New vasodilator drugs have rarely been used in COPD and ILD patients exhibiting severe PH.
		Unrelated	64	Toothpaste Product	INHIBITS	Tooth Demineralization	https://www.ncbi.nlm.nih.gov/pmc/articles/PMC4508471/	According to Strassler [10], hydroxyapatite is one of the active ingredient materials that are widely used in toothpaste products for protection against teeth demineralization [11 13].
		Related	65	Alzheimer's Disease	ASSOCIATED_WITH	Oxidative Phosphorylation	https://pubmed.ncbi.nlm.nih.gov/15075441/	In Alzheimer's disease (AD) pathogenesis, increasing evidence implicates mitochondrial dysfunction resulting from molecular defects in oxidative phosphorylation (OXPHOS).
		Related	66	tau Proteins	INHIBITS	Alzheimer's Disease	https://pubmed.ncbi.nlm.nih.gov/17721707/	Furthermore, total tau protein levels were slightly decreased in both FTLD and AD as compared to control subjects.
Quality score: 2 (does mention some detail mechanisms and makes logicial inferences, but no evidence or references to support the statements)		Unrelated	67	Neuraminidase Inhibitor [EPC]	STIMULATES	Adjustment Disorders	https://pubmed.ncbi.nlm.nih.gov/357721/	For the syntheses, 2,4-bis(trimethylsily)-5-fluorouracil (Me3Si-FU, 1) and 2-acetoxytetrahydrofuran (Thf-OAc, 2) were condensed in the presence of Friedel-Crafts catalysts, such as SnCl4 and BF3-Et2O in dichloromethane, or in the presence of NaI in acetonitrile to give Thf-Fu or Thf2-FU depending on the reaction conditions and workup procedure.
		Unrelated	68	Endotoxins	INHIBITS	Hepatic impairment	https://pubmed.ncbi.nlm.nih.gov/12599696/	RESULTS: ERP could improve rat neuro-reflexes, decrease the staging of HE and rat serum ammonium, endotoxin concentrations, and reduce the liver impairment.
(Highlight in red: incorrect citations)		Related	69	tau Proteins	CAUSES	Alzheimer's Disease	https://pubmed.ncbi.nlm.nih.gov/1527090/	It has been suggested that hyperphosphorylation of the tau protein in neurofibrillary tangles may be relevant to the etiology of Alzheimer's disease and that at least one of the hyperphosphorylated sites lies within a consensus sequence for the p34cdc2/cdc28 family of kinases.
		Related	70	Microhemorrhage	CAUSES	Alzheimer's Disease	https://pubmed.ncbi.nlm.nih.gov/31084613/	The majority of AD patients also have Abeta deposition in cerebral vessels known as cerebral amyloid angiopathy (CAA), microhemorrhages, and vascular co-morbidities, suggesting that cerebrovascular dysfunction contributes to AD etiology.
		Related	71	amyloid precursor protein catabolic process	COEXISTS_WITH	Alzheimer's Disease	https://pubmed.ncbi.nlm.nih.gov/18393801/	Epsilon-secretase: reduction of amyloid precursor protein epsilon-site cleavage in Alzheimer's disease.
		Related	72	Phosphorylation	COEXISTS_WITH	Alzheimer Disease 9	https://www.ncbi.nlm.nih.gov/pmc/articles/PMC6907052/	These biochemical and immunohistochemically analyses indicate a temporal causal relationship between Artemether therapy and reduced amyloid- deposition and phosphorylation of tau pathologies in 3xTg-AD mice.3.9.
		Related	73	Amyloid beta-Peptides	STIMULATES	Alzheimer's Disease	https://pubmed.ncbi.nlm.nih.gov/8761337/	Moreover, beta-amyloid was capable of inducing an AD-like phenotype for K+ channels and Cp20 in otherwise normal fibroblasts, providing additional evidence for the potential involvement of these components in AD and suggesting a possible pathological consequence of soluble beta-amyloid elevation in AD.
		Unrelated	74	Sphingomyelins	ASSOCIATED_WITH	PREMATURE CHROMATID SEPARATION TRAIT	https://pubmed.ncbi.nlm.nih.gov/16478109/	In vitro and in situ results revealed a decrease in SMs and an unexpected increase in some PCs.
		Related	75	Phosphorylation	COEXISTS_WITH	Alzheimer's Disease	https://pubmed.ncbi.nlm.nih.gov/3159022/	Aberrant neurofilament phosphorylation in Alzheimer disease.
		Unrelated	76	valsartan	INHIBITS	atrial fibrillation new onset	https://www.ncbi.nlm.nih.gov/pmc/articles/PMC3823086/	Clinically, valsartan-based treatment reduced the development of new-onset AF in hypertensive patients in the VALUE trial [26] and Val-HeFT study showed that therapy with valsartan for heart failure significantly reduced the incidence of AF [25].
		Unrelated	77	Hydroxymethylglutaryl-CoA Reductase Inhibitors	INHIBITS	Visceral Myopathy	https://www.ncbi.nlm.nih.gov/pmc/articles/PMC4608090/	Although both ROCK1 and ROCK2 are expressed in VSMC, however, compared to ROCK1, ROCK2 plays profound roles in VSMC contractility.70 Other than ROCK inhibitor, statins have also been found beneficial for reducing VSCM constriction.
		Related	78	primary amine oxidase activity	COEXISTS_WITH	Alzheimer's Disease	https://pubmed.ncbi.nlm.nih.gov/2222781/	Increased platelet 3H-imipramine binding and monoamine oxidase B activity in Alzheimer's disease.
		Related	79	Amyloid beta-Peptides	TREATS	Alzheimer's Disease	https://pubmed.ncbi.nlm.nih.gov/17105434/	The biology, structure and physiological properties of beta-amyloid peptide and related proteases (secretases) are discussed, as well as existing therapeutics and future strategies for the treatment of Alzheimer's disease.
		Unrelated	80	HLA class I	CAUSES	Primary malignant neoplasm	https://www.ncbi.nlm.nih.gov/pmc/articles/PMC7555729/	They reported that reduction of T-cell numbers, CD3 zeta chain, and HLA class I molecules can promote the development of primary cancers by inducing immunosuppression [68].
		Related	81	tau Proteins	ASSOCIATED_WITH	Alzheimer's Disease	https://pubmed.ncbi.nlm.nih.gov/2424016/	Microtubule-associated protein tau (tau) is a major antigenic component of paired helical filaments in Alzheimer disease.
		Unrelated	82	Neuro-Oncological Ventral Antigen 2, Human	ASSOCIATED_WITH	FORSYTHE-WAKELING SYNDROME	https://www.ncbi.nlm.nih.gov/pmc/articles/PMC8775139/	However, in the second scenario, we explored the FW components generated between 200 images (known-related) per class and the models parameters.The ANOVA results of the effect of the test dataset types on the FWs between the test images features and the model s weights are listed in the second category in Table 2.
		Unrelated	83	methotrexate	ASSOCIATED_WITH	Diagnosis, Psychiatric	https://www.ncbi.nlm.nih.gov/pmc/articles/PMC7571399/	Similarly, partially and fully adjusted logistic regression models were used to examine associations of psychiatric diagnoses with MTX and TNFi treatment adherence.
		Unrelated	84	INVESTIGATIONAL AGENTS	TREATS	Neurofibromatosis 1	https://www.ncbi.nlm.nih.gov/pmc/articles/PMC3128176/	A preclinical model predicting activity would be useful to prioritize clinical trials for investigational targeted agents in patients with NF1 and plexiform neurofibroma.
		Unrelated	85	survivin	ASSOCIATED_WITH	aggressive cancer	https://www.ncbi.nlm.nih.gov/pmc/articles/PMC3174681/	Survivin is found associating with HSPs in extracellular media Previous work accomplished by our laboratory [10] described for the first time an extracellular pool of Survivin that when re-incubated with cancer cell lines enhanced functional characteristics associated with more aggressive cancer phenotypes such as proliferation, anti-apoptosis and invasion.
		Unrelated	86	immunoglobulin A, human	STIMULATES	vascular inflammations	https://www.ncbi.nlm.nih.gov/pmc/articles/PMC3557193/	Except for the most characteristic finding, that is glomerular mesangial area deposition of IgA, a considerable proportion of IgAN patients present with histological vasculitic/crescentic lesions in glomeruli, accompanied by distinct neutrophils and/or monocytes infiltration, indicating the activation of vascular inflammation in IgAN [2].
		Unrelated	87	quercetin	CAUSES	High-oxygen-affinity hemoglobin	https://www.ncbi.nlm.nih.gov/pmc/articles/PMC8533533/	Accordingly, we suggest combination antioxidant therapy using quercetin with hydroxyurea therapy might induce the generation of high oxygen affinity fetal Hb, and can further modify the mild pathophysiology of disease in mid-eastern countries and the Indian subcontinent.
		Unrelated	88	ANTIHISTAMINE/DECONGESTANT	TREATS	Upper Respiratory Infections	https://www.ncbi.nlm.nih.gov/pmc/articles/PMC6909059/	Combinations of decongestant, antihistaminic and analgesic preparations are widely used for cough and cold treatment.
		Unrelated	89	alendronate	TREATS	tumor growth	https://www.ncbi.nlm.nih.gov/pmc/articles/PMC3997992/	A conjugate comprised of a copolymer backbone, alendronate, and the angiogenesis inhibitor TNP-470 produced significant anti-angiogenic effects, high localization to the bone, and a significant decrease in tumor growth in a murine osteosarcoma model.
		Related	90	Phosphorylation	COEXISTS_WITH	Familial Alzheimer Disease (FAD)	https://www.ncbi.nlm.nih.gov/pmc/articles/PMC5709977/	Our findings demonstrate that increased TAU phosphorylation occurs in fAD and sAD iPSC-derived mature neurons.
		Unrelated	91	Cream Base	TREATS	Vascular Diseases	https://pubmed.ncbi.nlm.nih.gov/6206879/	[Controlled clinical trial of a topical heparin- and heparinoid- based cream in the treatment of vascular diseases].
		Related	92	Amyloid beta-Peptides	CAUSES	Alzheimer's Disease	https://pubmed.ncbi.nlm.nih.gov/2907602/	It is thus very tempting to speculate that a defect (or defects) of the amyloid beta protein gene is the cause of Alzheimer's disease.
		Unrelated	93	Lipopolysaccharides	ASSOCIATED_WITH	Animal Health	https://www.ncbi.nlm.nih.gov/pmc/articles/PMC9143553/	As a result of excessive microbial growth, the products of microorganisms, such as mycotoxins, or of cell wall components, such as lipopolysaccharides (LPS), can accumulate in the feed and affect animal health [15].
		Related	94	latrepirdine	INHIBITS	primary amine oxidase activity	https://pubmed.ncbi.nlm.nih.gov/2873848/	The in vitro experiments have demonstrated that dimebone (10(-4)) preferentially inhibited MAO activity, type B and dopamine deamination in homogenates of different rat brain structures.
		Unrelated	95	Thiazolidinediones	TREATS	Diabetes mellitus progression	https://pubmed.ncbi.nlm.nih.gov/17619358/	[ADOPT study. Glitazone controls diabetes progression].
		Related	96	latrepirdine	STIMULATES	protein kinase activity	https://www.ncbi.nlm.nih.gov/pmc/articles/PMC3818013/	In accordance with this hypothesis, treatment with latrepirdine progressively increased AMPK activity over 24 h, and hyperpolarization of p also continued to occur for the duration of the 4-h experiment.
		Related	97	Familial Alzheimer Disease (FAD)	ASSOCIATED_WITH	amyloid precursor protein catabolic process	https://www.ncbi.nlm.nih.gov/pmc/articles/PMC8090526/	The A hypothesis is supported by findings from genetics: (1) familial AD mutations of APP and PSEN1/2, transcripts encoding two key components of the -secretase complex, are involved in either A generation or A processing and result in excessive production of A 40 42 [33]; conversely, an APP missense mutation (A673T) results in a lifelong decrease in APP cleavage by -secretase, offering a reduced…
		Unrelated	98	Prescribed medications	TREATS	Erectile dysfunction	https://pubmed.ncbi.nlm.nih.gov/18290852/	Bilateral cerebral hemispheric infarction associated with sildenafil citrate (Viagra) use.
		Related	99	latrepirdine	INHIBITS	Phosphorylation	https://pubmed.ncbi.nlm.nih.gov/24726847/	Furthemore, the dimebon effect on 4-aminopyridine-evoked glutamate release was prevented by the protein kinase C inhibitor, and dimebon substantially reduced the 4-AP-induced phosphorylation of protein kinase C.
		Unrelated	100	Complement inhibition	ASSOCIATED_WITH	Cold Hemagglutinin Disease	https://www.ncbi.nlm.nih.gov/pmc/articles/PMC8243056/	The first study of complement inhibition in CAD was a phase 2 prospective clinical trial with the C5 inhibitor eculizumab (DECADE) [77].

## Sheet: Mecamylamine
Hypothesis (using supporting sentences)		(Un)Related	Ref	Subject Entity Name	Relation type	Object Entity Name	URL	Sentence
Based on the presented evidence, we hypothesize that mecamylamine, a non-selective, non-competitive antagonist of nicotinic acetylcholine receptors (nAChRs), may have therapeutic potential in the treatment of Alzheimer's disease (AD). This hypothesis is supported by several lines of evidence. Firstly, alterations in nAChRs gene expression have been associated with AD [23], and mecamylamine has be…		Unrelated	1	lipid mediator	STIMULATES	Osteoporosis	https://pubmed.ncbi.nlm.nih.gov/18187046/	The production of a variety of lipid mediators is enhanced in bone-resorptive diseases such as osteoporosis, rheumatoid arthritis, osteoarthritis, and periodontitis.
		Related	2	Amyloid beta-Peptides	CAUSES	Alzheimer Disease, Early Onset	https://pubmed.ncbi.nlm.nih.gov/10230703/	Genetic studies on some families have shown that mutations in the genes encoding beta-amyloid precursor protein and presenilins 1 and 2 are responsible for early-onset AD.
		Unrelated	3	Adrenal Cortex Hormones	TREATS	stress related disorder	https://pubmed.ncbi.nlm.nih.gov/32762500/	The aim of this study is to test the hypotheses that (1) neonates requiring catecholamine blood pressure support are more often born to mothers with stress-related cardiometabolic diseases, (2) maternal stress-related diseases are associated with more frequent requirement of maternal corticosteroid treatment and (3) antenatal steroid exposure of neonates reduces the need of postnatal catecholamin…
		Unrelated	4	serotonin	ASSOCIATED_WITH	Violent	https://pubmed.ncbi.nlm.nih.gov/2460415/	The evidence is reviewed that violent and suicidal behavior is associated with a deficiency of the serotonin system and that individuals with poor impulse control tend to become hypoglycemic during an oral glucose tolerance test, and have low levels of 5-hydroxyindole acetic acid in the cerebrospinal fluid.
		Related	5	Amyloid beta-Peptides	CAUSES	Alzheimer Disease, Late Onset	https://www.ncbi.nlm.nih.gov/pmc/articles/PMC4045094/	In this study, we investigate the influence of interactions between genes previously associated with Alzheimer s Disease (AD) on amyloid-beta (A ) load in an effort to better understand the genetic etiology of A deposition and, by extension, risk for LOAD.
		Unrelated	6	Catechol-O-Methyltransferase Inhibitor [EPC]	TREATS	Fish-Eye Disease	https://www.ncbi.nlm.nih.gov/pmc/articles/PMC5554180/	2 weeks feeding of HFD increased the trend of the liver triglycerides level; COMT inhibitor treatment further exacerbates the level of liver triglycerides in the HFD fed mice; 2-ME injection displayed remarkable suppression in COMT inhibitor treated HFD fed mice (Fig. S3).
		Unrelated	7	Dihydroartemisinin	INHIBITS	Pneumonia	https://www.ncbi.nlm.nih.gov/pmc/articles/PMC8876897/	Further experiments demonstrated that DHA reduced lung inflammation and lung tissue damage by inhibiting the phosphorylation of JAK2 and STAT3.
		Related	8	mecamylamine	ASSOCIATED_WITH	Chemosensitization	https://pubmed.ncbi.nlm.nih.gov/14573772/	This potentiation was blocked by mecamylamine, whereas galantamine had no effect on these measures in the absence of nicotine.
		Unrelated	9	Recombinant Interferon-alpha Inducible Protein 10	ASSOCIATED_WITH	early pregnancy	https://pubmed.ncbi.nlm.nih.gov/34655920/	The role of IP-10 and its receptor CXCR3 in early pregnancy.
		Related	10	mecamylamine	STIMULATES	nicotinic acetylcholine-activated cation-selective channel activity	https://www.ncbi.nlm.nih.gov/pmc/articles/PMC4567349/	Indeed, in vivo, MM was shown to upregulate the surface expression of nAChRs and may increase their stability[51].
		Unrelated	11	Balance (substance)	ASSOCIATED_WITH	Depressive disorder	https://pubmed.ncbi.nlm.nih.gov/6261845/	Since cyclic AMP and cyclic GMP may be viewed as balancing substances, their interaction may provide a mechanism for Li's dual clinical effects in mania and depression.
		Unrelated	12	YH 529	INHIBITS	Secondary malignant neoplasm of bone	https://pubmed.ncbi.nlm.nih.gov/9650565/	To examine whether YH529 would prevent such bone metastasis, we administered YH529 s.c. to nude mice simultaneously with cancer cell inoculation through the entire experimental period (protocol 1) or performed short-term prophylactic administration before inoculation of the MDA-231 cells (protocol 2).
		Unrelated	13	Amphiphilic Agents	CAUSES	Lysosomal Storage Diseases	https://pubmed.ncbi.nlm.nih.gov/3942773/	When compared with other cationic amphiphilic agents which are known to produce phospholipidosis, amiodarone is one of the most potent inhibitors yet discovered.
		Related	14	Amyloid beta-Peptides	ASSOCIATED_WITH	Alzheimer Disease 7	https://www.ncbi.nlm.nih.gov/pmc/articles/PMC7989959/	Aggregation and misfolding of amyloid-beta (A ) is a potential mechanism in AD patients.7 A monomers assemble into A O (A oligomers) and fibrils and are then distributed into the circulating blood or cerebrospinal fluid (CSF).1 The A O is neurotoxic and is highly correlated with severe AD.
		Related	15	mecamylamine	INHIBITS	nicotinic acetylcholine-activated cation-selective channel activity	https://pubmed.ncbi.nlm.nih.gov/8793902/	Thus, MK-801 acted as a non-stereoselective alpha 7 nAChR inhibitor that was only about 8-fold less potent than the nAChR antagonist mecamylamine and probably acted through channel blockade.
		Related	16	tau Proteins	CAUSES	Alzheimer's Disease	https://pubmed.ncbi.nlm.nih.gov/1527090/	It has been suggested that hyperphosphorylation of the tau protein in neurofibrillary tangles may be relevant to the etiology of Alzheimer's disease and that at least one of the hyperphosphorylated sites lies within a consensus sequence for the p34cdc2/cdc28 family of kinases.
Quality score: 3 (although it has some detail mechanisms and does make some logical inferences, one cited sentence mentioning a mechanism contradicts the reference. Another cited sentence mentioning a mechanism states mecamylamine does said mechanism when reference says nicotine does it)		Unrelated	17	Extracellular Polymeric Substances	STIMULATES	Nail-Patella Syndrome	https://www.ncbi.nlm.nih.gov/pmc/articles/PMC9103322/	These extracellular polymeric substances may play important roles in the synthesis and stabilization of nanoparticles and may enhance the efficacy of NPs [33].
		Unrelated	18	WT-1	ASSOCIATED_WITH	MYELODYSPLASTIC SYNDROME	https://www.ncbi.nlm.nih.gov/pmc/articles/PMC8572864/	WT-1 has been reported to be useful for risk classification and assessment of minimal residual disease (MRD) in MDS.
Hypothesis (using supporting sentences and unrelated sentences)		Unrelated	19	Adapt (substance)	ASSOCIATED_WITH	Malignant neoplasm of breast	https://www.ncbi.nlm.nih.gov/pmc/articles/PMC8995855/	In addition, we do not rule out the possibility that some premenopausal women who work on shifts or short-term night work may switch to the daytime schedule earlier due to difficulty in adapting to the rotation or night time schedule, thus making the effect on BC paradoxically insignificant after 10 years of night shift work in premenopausal women.
Based on the evidence provided, we hypothesize that mecamylamine, a non-selective antagonist of nicotinic acetylcholine receptors (nAChRs), could potentially be used as a treatment for Alzheimer's disease (AD). This hypothesis is primarily based on the role of nAChRs in AD and the ability of mecamylamine to modulate these receptors [8, 15, 51, 66, 86, 90, 99]. Genetic studies have shown that muta…		Related	20	Amyloid beta-Peptides	ASSOCIATED_WITH	Alzheimer disease, familial, type 3	https://www.ncbi.nlm.nih.gov/pmc/articles/PMC8476544/	Although the physiological relevance of the fragments generated is not fully understood, one of these, the amyloid-beta peptide (A ) originating from the transmembrane domain of the APP protein, is the main component of brain amyloid plaques in Alzheimer s disease (AD)3,4.
		Related	21	Microhemorrhage	CAUSES	Alzheimer's Disease	https://pubmed.ncbi.nlm.nih.gov/31084613/	The majority of AD patients also have Abeta deposition in cerebral vessels known as cerebral amyloid angiopathy (CAA), microhemorrhages, and vascular co-morbidities, suggesting that cerebrovascular dysfunction contributes to AD etiology.
		Related	22	Amyloid beta-Peptides	ASSOCIATED_WITH	Alzheimer's Disease	https://pubmed.ncbi.nlm.nih.gov/3555492/	The mouse homolog of the human amyloid beta protein (AD-AP) gene is located on the distal end of mouse chromosome 16: further extension of the homology between human chromosome 21 and mouse chromosome 16.
		Related	23	Alzheimer's Disease	ASSOCIATED_WITH	nicotinic acetylcholine-activated cation-selective channel activity	https://pubmed.ncbi.nlm.nih.gov/10095081/	The increased mRNA level of alpha7 previously found in lymphocytes, and now also in the hippocampus of AD patients, indicate that subunit specific changes in gene expression of nAChRs is associated with AD.
		Related	24	Amyloid beta-Peptides	STIMULATES	Alzheimer's Disease	https://pubmed.ncbi.nlm.nih.gov/8761337/	Moreover, beta-amyloid was capable of inducing an AD-like phenotype for K+ channels and Cp20 in otherwise normal fibroblasts, providing additional evidence for the potential involvement of these components in AD and suggesting a possible pathological consequence of soluble beta-amyloid elevation in AD.
		Unrelated	25	Antiviral Agents	TREATS	Compensated cirrhosis	https://pubmed.ncbi.nlm.nih.gov/26558145/	The efficacy of DAAs for treatment of compensated liver cirrhosis (LC) is not less than that for treatment of non-cirrhotic conditions.
		Related	26	Amyloid beta-Peptides	CAUSES	ALZHEIMER DISEASE 5	https://www.ncbi.nlm.nih.gov/pmc/articles/PMC6946617/	The deposition of beta-amyloid is an initial step in the pathogenesis of AD.5 However, the exact role of amyloid deposition and neurofibrillary tangle formation in MCI has not been studied extensively.
		Unrelated	27	rhodioloside	ASSOCIATED_WITH	tumor growth	https://pubmed.ncbi.nlm.nih.gov/25814002/	In addition, we also evaluated the effect of salidroside on tumor growth in a nude mouse model, and found that salidroside treatment significantly suppressed tumor growth in vivo.
		Unrelated	28	Anti-Antibodies	ASSOCIATED_WITH	Renal glomerular fibrosis	https://www.ncbi.nlm.nih.gov/pmc/articles/PMC3818880/	The blockade of TGF- 1 with neutralizing antibodies markedly reduced apoptosis as well as protein overexpression of ECM components (Type III Collagen and Fibronectin) in a rat UUO model129 as observed in cultured renal cells.130,131 The antifibrotic potential of anti-TGF- 1 antibodies is undergoing a clinical trial in the renal glomerular fibrosis and podocyte loss of focal segmental glomerular s…
		Unrelated	29	Glycoproteins	ASSOCIATED_WITH	Schizophrenics	https://pubmed.ncbi.nlm.nih.gov/7397710/	This elevation of serum glycoprotein paralleled serum glycosaminoglycan elevation previously reported by us, but was opposite to decrease of urinary glycoprotein in schizophrenics.
		Unrelated	30	AG 14361	INHIBITS	tumor growth	https://www.ncbi.nlm.nih.gov/pmc/articles/PMC4013421/	Radiation resistant cells treated with radiotherapy (XRT) after exposure to AG14361 experienced a 73% increase in tumor growth inhibition compared to treatment with XRT alone[30].
		Related	31	superoxide dismutase activity	COEXISTS_WITH	Alzheimer's Disease	https://pubmed.ncbi.nlm.nih.gov/2521568/	Superoxide dismutase activity in Alzheimer's disease: possible mechanism for paired helical filament formation.
		Unrelated	32	calcium	ASSOCIATED_WITH	end organ damage	https://www.ncbi.nlm.nih.gov/pmc/articles/PMC8158124/	Besides, aortic wall calcium exacerbates arterial stiffening [2], which is associated with end-organ damage [3].
		Related	33	Amyloid beta-Peptides	ASSOCIATED_WITH	Alzheimer Disease, Late Onset	https://pubmed.ncbi.nlm.nih.gov/14692704/	The present study was carried out to examine the coincidence of these small vessel pathologies during the development of cognitive deficits, amyloid beta-protein (A beta) deposition, and neurofibrillary tangle (NFT) formation in sporadic late-onset AD.
		Related	34	Amyloid beta-Peptides	ASSOCIATED_WITH	Alzheimer Disease 12	https://www.ncbi.nlm.nih.gov/pmc/articles/PMC2773287/	It is hypothesized that high concentrations of glutamate cause an excess calcium influx through the ion channel that leads to excitotoxicity.10 It has been shown in AD patients that glutamate transporters in glial cells are reduced, while the presence of beta amyloid indirectly stimulates excessive glutamate production.11 This phenomenon is thought to contribute to the neurotoxicity of beta amylo…
		Unrelated	35	Biomodulin T	ASSOCIATED_WITH	Neoplasm Metastasis	https://pubmed.ncbi.nlm.nih.gov/24348821/	Furthermore, the expression of cyclin D1 gradually increased in the NOT, OSA, OS-BT and OSC groups and was associated with tumor metastasis.
		Related	36	mecamylamine	INHIBITS	enzyme activity	https://www.ncbi.nlm.nih.gov/pmc/articles/PMC3781080/	MEC slightly reversed the enzyme activity, but this reversion was not statistically significant (Fig. 4).
Quality score: 3 (A mechanism mentioned in a sentence cited says the opposite of what the reference says. Not many detail mechanisms mentioned)		Unrelated	37	FK3000	INHIBITS	tumor growth	https://www.ncbi.nlm.nih.gov/pmc/articles/PMC4441289/	FK-3000 inhibited tumor growth in the MDA-MB-231 xenograft model.
		Unrelated	38	Endogenous Opiates	ASSOCIATED_WITH	Chronic pelvic pain syndrome	https://www.ncbi.nlm.nih.gov/pmc/articles/PMC5605002/	Persistent analgesic activation for increased release of endogenous opioids in the bilateral ACCs and INCs may ultimately lead to an inefficient opioid analgesia system in CP/CPPS.
Hypothesis (using relations and unrelated relations)		Related	39	Microhemorrhage	COEXISTS_WITH	Alzheimer's Disease	https://pubmed.ncbi.nlm.nih.gov/21392891/	CAA and cerebral microhemorrhages in AD have similar spatial distribution of lobar predominance, and their accumulation similarly affect cognitive function.
Based on the provided evidence, it can be hypothesized that mecamylamine may have potential therapeutic effects in the treatment of Alzheimer's disease. Mecamylamine is associated with chemosensitization [8, 77, 80, 90, 93] and has been shown to stimulate nicotinic acetylcholine-activated cation-selective channel activity [10], which is also associated with Alzheimer's disease [23, 75]. Furthermo…		Unrelated	40	NADH	CAUSES	Carcinogenesis	https://www.ncbi.nlm.nih.gov/pmc/articles/PMC9119829/	Redox imbalance of NAD+/NADH and NADP+/NADPH pairs may trigger two hidden pathways that drive metabolic reprogramming to overcome cell aging and induce carcinogenesis: (i) multi-enzymatic hydride transfer complex cycle HTC cycle [6]; and (ii) -oxidation-citrate-malate shuttle or -oxidation shuttle for short [7].
		Related	41	immunoreactivity	COEXISTS_WITH	Alzheimer's Disease	https://pubmed.ncbi.nlm.nih.gov/2868073/	Somatostatin immunoreactivity in cortical and some subcortical regions in Alzheimer's disease.
		Related	42	Amyloid beta-Peptides	ASSOCIATED_WITH	Alzheimer Disease 9	https://www.ncbi.nlm.nih.gov/pmc/articles/PMC3622466/	Cognition and its decline associated with brain aging also seems to be variable and possibly open to modifications.1 Studies in humans and animal models suggest that age-related cognitive decline is more likely to be associated with alterations in synaptic connectivity than with neuronal loss and white matter changes.6,7 According to recent studies, alterations of intracellular -secretase mediate…
		Unrelated	43	serine	ASSOCIATED_WITH	Metastatic Renal Cell Cancer	https://pubmed.ncbi.nlm.nih.gov/2332772/	Phase II trial of interferon-beta-serine in metastatic renal cell carcinoma.
		Unrelated	44	bamboo extract	CAUSES	Contact Dermatitis	https://pubmed.ncbi.nlm.nih.gov/14837501/	Contact dermatitis caused by bamboo.
		Unrelated	45	green tea extract	INHIBITS	Flu symptoms	https://www.ncbi.nlm.nih.gov/pmc/articles/PMC8057798/	It also acts as an agonist against cannabinoid B2 receptor, trigger NK cells, and increase leucocyte circulation.145 Camellia sinensis (green tea) extract reportedly reduced flu infection s clinical symptoms in a double-blind study and promoted T lymphocyte functions.146 Echium amoenum (Boraginaceae) extract to act on the macrophages to reduce iNOS and COX2 enzymes and TNF- , IL-1 , and IL-6 cyto…
		Unrelated	46	Lithium.serum	ASSOCIATED_WITH	Non-Convulsive Status Epilepticus	https://pubmed.ncbi.nlm.nih.gov/16601939/	The purpose of this study is to report the case of a patient with normal lithium serum levels who developed non-convulsive status epilepticus (NCSE).
		Unrelated	47	Leukotriene Synthesis Inhibitor [EPC]	TREATS	Psoriasis	https://pubmed.ncbi.nlm.nih.gov/1724166/	Clinical and biochemical effects of an oral leukotriene biosynthesis inhibitor (MK886) in psoriasis.
		Related	48	Alzheimer's Disease	ASSOCIATED_WITH	Phosphorylation	https://pubmed.ncbi.nlm.nih.gov/8746795/	Abnormal phosphorylation by PKC as well as reduced levels of PKC has been implicated in the neurodegeneration associated with AD and aging.
		Related	49	Amyloid beta-Peptides	TREATS	Alzheimer's Disease	https://pubmed.ncbi.nlm.nih.gov/17105434/	The biology, structure and physiological properties of beta-amyloid peptide and related proteases (secretases) are discussed, as well as existing therapeutics and future strategies for the treatment of Alzheimer's disease.
		Unrelated	50	Dopamine-2 Receptor Antagonist	INHIBITS	Psychotic Disorders	https://www.ncbi.nlm.nih.gov/pmc/articles/PMC6511348/	Haloperidol, a typical but still commonly administered D2 receptor antagonist, effectively reduces psychosis suggesting impaired dopaminergic signaling is a key mechanism of positive schizophrenia symptoms (Gass et al. 2013).
		Related	51	mecamylamine	INHIBITS	Phosphorylation	https://pubmed.ncbi.nlm.nih.gov/16219421/	Mecamylamine, dextromethorphan and 18-methoxycoronaridine inhibited nicotine-induced ERK phosphorylation with much higher affinity than dihydro-beta-erythroidine and alpha-conotoxin MII.
		Unrelated	52	Vaccines, Synthetic	INHIBITS	tumor growth	https://www.ncbi.nlm.nih.gov/pmc/articles/PMC5448976/	In both cases, synthetic long peptide vaccines were able to significantly inhibit tumor growth.
		Related	53	Phosphorylation	COEXISTS_WITH	Alzheimer Disease 11	https://www.ncbi.nlm.nih.gov/pmc/articles/PMC8595611/	Thus, tau phosphorylation and spreading may represent ideal therapeutic targets in AD11, 12, while tau-related outcome measures may be generally useful for trials of potential disease-modifying therapies.
		Related	54	Amyloid beta-Peptides	CAUSES	Alzheimer Disease 7	https://www.ncbi.nlm.nih.gov/pmc/articles/PMC2723955/	The techniques were applied to the detection of amyloid-beta derived diffusible ligands (ADDLs) which play an important role in the molecular pathogenesis of Alzheimer s Disease.7
Quality score: 2 (states that mecamylamine inhibits and stimulates nicotinic acetylcholine-activated cation-selective channel activity, which is confusing. Also no references to strengthen/support hypothesis)		Unrelated	55	lipid mediator	ASSOCIATED_WITH	tumor growth	https://www.ncbi.nlm.nih.gov/pmc/articles/PMC6372534/	PAF is a potent lipid mediator of vascular and inflammatory processes that has more recently been implicated in tumor growth, angiogenesis, and metastasis (Bussolino et al. 1995).
		Unrelated	56	phospholipids	ASSOCIATED_WITH	NEPHRITIS MEMBRANOUS	https://pubmed.ncbi.nlm.nih.gov/6130790/	Effect of phospholipid methylation on calcium transport and (Ca2+ + Mg2+)-ATPase activity in kidney cortex basolateral membranes.
Hypothesis (using no additional information)		Unrelated	57	chemokine	ASSOCIATED_WITH	gastritis h pylori	https://www.ncbi.nlm.nih.gov/pmc/articles/PMC3404125/	Accumulating evidence has shown that a variety of chemokines are involved in the development of HAG.
Hypothesis: Mecamylamine, a non-selective, non-competitive antagonist of the nicotinic acetylcholine receptors (nAChRs), may have potential therapeutic effects in the treatment of Alzheimer's disease. The pathophysiology of Alzheimer's disease is characterized by a progressive loss of cholinergic neurons in the brain, leading to cognitive decline and memory impairment. Mecamylamine, by blocking t…		Unrelated	58	BPS	CAUSES	Cardiovascular morbidity	https://pubmed.ncbi.nlm.nih.gov/22894630/	They pointed out that ambulatory BPs are important predictors of cardiovascular morbidity and mortality, whereas office BP has no prognostic value.
		Related	59	Alzheimer's Disease	ASSOCIATED_WITH	immunoreactivity	https://pubmed.ncbi.nlm.nih.gov/2109482/	By contrast, in AD and in P-D complex a significant decrease in immunoreactivity was observed in all hippocampal strata, and especially of the hippocampal subfield CA1 and the subiculum.
		Unrelated	60	SOX Transcription Factors	ASSOCIATED_WITH	tumor growth	https://www.ncbi.nlm.nih.gov/pmc/articles/PMC7156234/	Many studies have demonstrated that LEF1-AS1 is enrolled in the tumorigenesis of a variety of cancer, such as glioblastoma,9 oral squamous cell carcinoma,10 non-small-cell lung cancer11 and prostate cancer.12 Furthermore, several recent studies had indicated that LEF1-AS1 was upregulated and correlated with the overall and recurrent-free survival of colon cancer patients, but the exact role of LE…
		Related	61	enzyme activity	COEXISTS_WITH	Alzheimer's Disease	https://pubmed.ncbi.nlm.nih.gov/6779929/	Enzyme activity was decreased in the frontal and temporal cortices and hippocampus in patients with Alzheimer's disease, but was within the normal range in patients with depression, multiinfarct dementia, and terminal coma.The decrease in enzyme activity in Alzheimer's disease may reflect an abnormality of cortical noradrenergic fibres in some patients with the disease.
		Related	62	Amyloid beta-Peptides	ASSOCIATED_WITH	ALZHEIMER DISEASE 18	https://www.ncbi.nlm.nih.gov/pmc/articles/PMC7864928/	Considering the potential functions of the PVS system, studies had proved that the PVS waste drainage system contributed to a larger portion of interstitial solutes clearance, such as amyloid beta (A ), preventing A deposition that was thought to be pathogenic in AD18,22.
		Unrelated	63	GLP-1 Receptor Agonist [EPC]	ASSOCIATED_WITH	Unipolar Depression	https://pubmed.ncbi.nlm.nih.gov/33222103/	These preliminary yet impactful data indicate that GLP-1R agonists may be useful as an adjunctive pharmacotherapy to treat cognitive deficits associated with MDD and/or multiple neurological disorders.
		Related	64	Phosphorylation	COEXISTS_WITH	Alzheimer Disease 9	https://www.ncbi.nlm.nih.gov/pmc/articles/PMC6907052/	These biochemical and immunohistochemically analyses indicate a temporal causal relationship between Artemether therapy and reduced amyloid- deposition and phosphorylation of tau pathologies in 3xTg-AD mice.3.9.
		Related	65	Amyloid beta-Peptides	CAUSES	Familial Alzheimer Disease (FAD)	https://pubmed.ncbi.nlm.nih.gov/9562460/	The significance of amyloid beta protein, especially those ending at the 42nd residue (Abeta42), in the pathogenesis of familial Alzheimer's disease (FAD) linked to the mutations of presenilins, was examined by transfection studies using cultured cells and immunohistochemical analysis of autopsied brains.
		Related	66	mecamylamine	ASSOCIATED_WITH	immunoreactivity	https://pubmed.ncbi.nlm.nih.gov/8364719/	A cholinergic antagonist, mecamylamine, blocks light-induced fos immunoreactivity in specific regions of the hamster suprachiasmatic nucleus.
		Related	67	Phosphorylation	COEXISTS_WITH	Alzheimer's Disease	https://pubmed.ncbi.nlm.nih.gov/3159022/	Aberrant neurofilament phosphorylation in Alzheimer disease.
		Unrelated	68	Benzophenones	INHIBITS	tumor growth	https://pubmed.ncbi.nlm.nih.gov/33448056/	Chiral derivatives of xanthones and benzophenones: Synthesis, enantioseparation, molecular docking, and tumor cell growth inhibition studies.
Quality score: 2 (not many detail mechanisms and no references to strengthen/support hypothesis)		Unrelated	69	lymphocyte immune globulin, anti-thymocyte globulin, equine	TREATS	Bone marrow dysplasia	https://pubmed.ncbi.nlm.nih.gov/3488073/	We have evaluated 33 patients with various bone marrow dyscrasias treated with horse antithymocyte globulin (ATG) (Upjohn) to determine the relationship of haematopoietic response to the occurrence of serum sickness.
		Related	70	immunoreactivity	COEXISTS_WITH	Alzheimer Disease 11	https://www.ncbi.nlm.nih.gov/pmc/articles/PMC4577022/	Equally important, all components of the classical IL-6 signaling pathway (IL-6, its membrane-bound receptor (IL-6R), and the signal-transducing component gp130) are detectable in the brain, with evidence of altered cortical immunoreactivity of the functional IL-6R complex in AD11.
(Highlight in red: incorrect citations)		Unrelated	71	VEGF165 protein, human	ASSOCIATED_WITH	tumor growth	https://www.ncbi.nlm.nih.gov/pmc/articles/PMC4131915/	Growth in agar reflects tumorigenic potential and results in vitro correlate with our previous findings in vivo, where expression of VEGF164 and VEGF120 was associated with a more rapid initiation of tumour growth [14].
		Related	72	Amyloid beta-Peptides	CAUSES	Alzheimer's Disease	https://pubmed.ncbi.nlm.nih.gov/2907602/	It is thus very tempting to speculate that a defect (or defects) of the amyloid beta protein gene is the cause of Alzheimer's disease.
		Unrelated	73	WITHANIA SOMNIFERA	TREATS	Anxiety Disorders	https://www.ncbi.nlm.nih.gov/pmc/articles/PMC7121644/	The limitations impair making definitive conclusions regarding the effectiveness of WS in anxiety disorders, but the body of study identifies WS as a relatively safe therapeutic and supports the role for conducting additional clinical studies.In both bipolar disease and schizophrenia, cognitive impairments are consistently associated with poorer functional outcomes.
		Unrelated	74	varicella-zoster immune globulin	INHIBITS	Varicella zoster	https://www.ncbi.nlm.nih.gov/pmc/articles/PMC1246900/	The use of prophylactic co-trimoxazole has prevented P carinii pneumonitis very effectively.2 Varicella zoster immunoglobulin is effective in preventing varicella zoster, and acyclovir is useful in treating varicella zoster and herpes simplex.3 The remaining major cause of mortality and morbidity from infection during immunosuppression is the measles virus.
		Related	75	nicotinic acetylcholine-activated cation-selective channel activity	COEXISTS_WITH	Alzheimer's Disease	https://pubmed.ncbi.nlm.nih.gov/10383644/	These results point to an impaired synthesis of nAChRs on the protein level as a possible cause of the cholinoceptive deficit in AD.
		Related	76	Amyloid beta-Peptides	ASSOCIATED_WITH	Alzheimer Disease, Early Onset	https://pubmed.ncbi.nlm.nih.gov/7998778/	Amyloid beta protein levels in cerebrospinal fluid are elevated in early-onset Alzheimer's disease.
		Related	77	Alzheimer's Disease	ASSOCIATED_WITH	Chemosensitization	https://www.ncbi.nlm.nih.gov/pmc/articles/PMC5018240/	Added to these similarities are findings that some neuronal populations in NPC1 develop abnormalities of endosomes resembling those seen at the earliest stages of AD, and that aberrant cholesterol trafficking is associated with the potentiation of toxic AD-like processing of the amyloid precursor protein (APP) (Borbon and Erickson, 2011; Grimm et al, 2005).
		Related	78	tau Proteins	STIMULATES	Alzheimer's Disease	https://pubmed.ncbi.nlm.nih.gov/9147408/	Dependence of cerebrospinal fluid Tau protein levels on apolipoprotein E4 allele frequency in patients with Alzheimer's disease.
		Unrelated	79	Interleukin-1	ASSOCIATED_WITH	PREMATURE CHROMATID SEPARATION TRAIT	https://www.ncbi.nlm.nih.gov/pmc/articles/PMC8903340/	Other biomarkers such as IL-1 , TNF- , IFN- , IL-10, IL-2, CRP, MCP-1, serum amyloid A, and metabolites of the kynurenine pathway may contribute to this symptomatology in PCS [27].
		Related	80	Chemosensitization	COEXISTS_WITH	Alzheimer's Disease	https://pubmed.ncbi.nlm.nih.gov/29178139/	Therefore, potentiation of the phagocytic properties of reactive astrocytes may represent a potential therapy in Alzheimer's disease.
		Related	81	Alzheimer's Disease	ASSOCIATED_WITH	enzyme activity	https://www.ncbi.nlm.nih.gov/pmc/articles/PMC5370953/	Analysis of the whole temporal lobe homogenate was interpreted as indicating that in Alzheimer's disease there was cell loss or shrinkage, loss of myelinated axons and reduction in enzyme activity connected with energy metabolism and transmitter synthesis[20].
		Related	82	tau Proteins	INHIBITS	Alzheimer's Disease	https://pubmed.ncbi.nlm.nih.gov/17721707/	Furthermore, total tau protein levels were slightly decreased in both FTLD and AD as compared to control subjects.
		Related	83	Alzheimer's Disease	PRODUCES	tau Proteins	https://pubmed.ncbi.nlm.nih.gov/24059239/	The two molecular hallmarks of AD are amyloid plaques created from an amyloid precursor protein and hyperphosphorylated tau protein that is deposited as neurofibrillary tangles inside neurons.
		Unrelated	84	Inotropic agent (substance)	CAUSES	Hypos	https://pubmed.ncbi.nlm.nih.gov/3586310/	End-systolic pressure length relations were evaluated under global changes in a contractile state, under selective intracoronary administration of inotropic agents to produce regional hypo- or hyper-kinesis, and before and after extension of size of the ischemia.
		Related	85	tau Proteins	ASSOCIATED_WITH	Familial Alzheimer Disease (FAD)	https://pubmed.ncbi.nlm.nih.gov/19782073/	In this work, we review the links between beta amyloid peptide, tau protein and GSK3 that occur in familial Alzheimer disease.
		Related	86	mecamylamine	INHIBITS	immunoreactivity	https://pubmed.ncbi.nlm.nih.gov/8364719/	The most striking observation was the clear inhibition of Fos-lir by mecamylamine in the dorsomedial region of the SCN while there was little inhibition of Fos-lir in the most ventral portions of the SCN.(ABSTRACT TRUNCATED AT 250 WORDS)
		Unrelated	87	Cytokeratin 5/6	ASSOCIATED_WITH	Noninfiltrating Intraductal Carcinoma	https://www.ncbi.nlm.nih.gov/pmc/articles/PMC6236862/	Most CKs are tetramers comprising two type-I keratins and two type-II keratins, for example, one tetramer that is composed of two CK5s and two CK14s.16 CK34betaE12 is an antibody that recognizes CKs 1, 5, 10, and 14.12,17 Theoretically, antibodies to CK5/6 and CK14 should show similar immunohistochemical staining patterns to CK34betaE12.B ecker and colleagues18,19 reported that a progenitor cell …
		Unrelated	88	Preproglucagon	ASSOCIATED_WITH	Bulimia	https://pubmed.ncbi.nlm.nih.gov/32061682/	Binge-like palatable food intake in rats reduces preproglucagon in the nucleus tractus solitarius.Binge eating involves eating larger than normal quantities of food within a discrete period of time.
		Unrelated	89	Basis	TREATS	3-Methylglutaconic aciduria type 2	https://pubmed.ncbi.nlm.nih.gov/23843353/	Herein, we will provide a current review of the genetic and molecular basis of BTHS, the clinical features and management of BTHS, and potential future directions for therapeutic strategies.
		Related	90	Chemosensitization	COEXISTS_WITH	Alzheimer Disease 11	https://www.ncbi.nlm.nih.gov/pmc/articles/PMC9221351/	Furthermore, we found that in both control and NGF-deprived mice, nicotine, via 7- and 2-containing nAChRs, was able at CA3-CA1 synapses to lower the threshold for the induction of long-term potentiation (LTP) and to convert short-term potentiation (STP) or weak LTP into robust LTP, an effect that in AD11 but not in control mice was prevented by GABAA receptor antagonists [152].
		Unrelated	91	Weight-Loss Agents	CAUSES	Agranulocytosis	https://www.ncbi.nlm.nih.gov/pmc/articles/PMC4103795/	In the 1930s, the drug 2,4-dinitrophenol was a very effective and popular weight-loss drug until the discovery that it caused agranulocytosis, cataracts, dermatitis, and fatal hyperthermia [12].
		Unrelated	92	alpha 1-antitrypsin	ASSOCIATED_WITH	tumor growth	https://pubmed.ncbi.nlm.nih.gov/15316942/	Comparative analysis of the human tumors and normal tissues of origin showed correlation between reduced local alpha(1)-antitrypsin expression and more aggressive tumor growth.
		Related	93	mecamylamine	STIMULATES	Chemosensitization	https://pubmed.ncbi.nlm.nih.gov/9293495/	Systemic injection of either mecamylamine or propranolol, 30 min before nicotine challenge, prevented induction of LLP without affecting baseline EPSPs but neither drug affected LLP when given after it was established.
		Unrelated	94	Immune complex	ASSOCIATED_WITH	tumor growth	https://pubmed.ncbi.nlm.nih.gov/51647/	The findings support the view that T lymphocytes lose their anti-tumour reactivity in vivo in the presence of circulating antigen or antigen-antibody complexes such as would occur with progressive tumour growth.
		Related	95	Chemosensitization	TREATS	Alzheimer's Disease	https://pubmed.ncbi.nlm.nih.gov/16372175/	Allosteric potentiation of acetylcholine nicotinic receptors is considered to be one of the most promising approaches for the treatment of Alzheimer's disease.
		Unrelated	96	Complement inhibition	ASSOCIATED_WITH	Myasthenia Gravis	https://www.ncbi.nlm.nih.gov/pmc/articles/PMC7283905/	These data suggest complement inhibition would not be effective in IgG4-predominant mediated MG, such as MuSK MG, as this immunoglobulin subclass activates complement weakly.
		Related	97	Phosphorylation	COEXISTS_WITH	Alzheimer Disease 13	https://www.ncbi.nlm.nih.gov/pmc/articles/PMC8935215/	For example, miR-326 has been shown to decrease tau phosphorylation and neuronal apoptosis in AD 13.
		Related	98	Amyloid beta-Peptides	ASSOCIATED_WITH	Familial Alzheimer Disease (FAD)	https://pubmed.ncbi.nlm.nih.gov/1465129/	Mutation of the beta-amyloid precursor protein in familial Alzheimer's disease increases beta-protein production.
		Related	99	mecamylamine	INHIBITS	Amyloid beta-Peptides	https://pubmed.ncbi.nlm.nih.gov/9080439/	Nicotine was found to attenuate the neurotoxicity of higher concentrations of beta AP(25-35), an effect which was enhanced by longer nicotine pretreatment and significantly inhibited by the nicotine receptor antagonist mecamylamine.
		Unrelated	100	ponesimod	INHIBITS	Diabetes, Autoimmune	https://www.ncbi.nlm.nih.gov/pmc/articles/PMC3811978/	In the present manuscript, we demonstrate the efficacy of ponesimod both in preventing autoimmune diabetes and in reversing established disease in the NOD mouse model.

## Sheet: Acamprosate
Hypothesis (using supporting sentences)		(Un)Related	Ref	Subject Entity Name	Relation type	Object Entity Name	URL	Sentence
Based on the evidence provided, we hypothesize that acamprosate, a drug known to modulate the NMDA receptor in a complex way [63], could potentially be used to treat Alzheimer's disease (AD). This hypothesis is grounded in the understanding that AD is characterized by the deposition of beta-amyloid plaques [24,11,42,34,10,9,53] and hyperphosphorylated tau protein [22,20,50,9], both of which contr…		Related	1	acamprosate	ASSOCIATED_WITH	Receptor Binding	https://pubmed.ncbi.nlm.nih.gov/9660305/	Ethanol dependence modifies effects of acamprosate on NMDA receptor binding in membranes from rat cerebral cortex.
		Unrelated	2	fusion transcript	ASSOCIATED_WITH	High grade serous carcinoma	https://www.ncbi.nlm.nih.gov/pmc/articles/PMC3967933/	Analyses of the output sequences indicated that none of the 15 validated fusion transcripts found in HG-SC samples was present in endometrioid or clear cell cancer samples.The known chromosomal instability of HG-SC is expected to lead to higher incidence of gene fusions.
		Related	3	Amyloid beta-Peptides	INHIBITS	Alzheimer's Disease	https://pubmed.ncbi.nlm.nih.gov/19723623/	Therefore, the inhibitory effect of PEDF appears to be mediated via the processing of VEGF-R2 by gamma-secretase. gamma-Secretase generates the amyloid-beta (Abeta) peptide of Alzheimer disease from its precursor (amyloid precursor protein).
		Unrelated	4	Basis	TREATS	Malignant Mesothelioma of Peritoneum	https://www.ncbi.nlm.nih.gov/pmc/articles/PMC4780268/	It is thought that the parietal pleura are the basis for malignant mesothelioma; however, there are rare cases of primary peritoneal mesothelioma [4 6].
		Unrelated	5	cholesterol	ASSOCIATED_WITH	SCLEROSING CHOLANGITIS, NEONATAL	https://www.ncbi.nlm.nih.gov/pmc/articles/PMC5597608/	NPC2 regulates the transport of cholesterol through the late endosomal/lysosomal system and mutations in this gene have been associated with Niemann-Pick disease type C2, a disease with a broad range of visceral, neurological and psychiatric clinical presentations75.In the quantitative proteomics of S-NSC (Fig. 5b) many more genes transcripts were modulated.
		Unrelated	6	coal tar	TREATS	Psoriatic plaque	https://pubmed.ncbi.nlm.nih.gov/897225/	A white ring similar to the Woronoff ring described after ultraviolet light and coal tar therapy of psoriatic plaques was reproduced surrounding the vesicular patch test reaction, suggesting that the inhibitory substance(s) detected following epidermal trauma of various types (physical, immunologic, inflammatory, etc.) functioned in vivo in a similar fashion.
		Unrelated	7	bacitracin	ASSOCIATED_WITH	Clostridium welchii infection	https://pubmed.ncbi.nlm.nih.gov/17859460/	The Use of Bacitracin in Experimental Clostridium Welchii Infection in Guinea Pigs.
		Unrelated	8	Herbal Drugs	TREATS	Chronic Condition	https://www.ncbi.nlm.nih.gov/pmc/articles/PMC6943788/	Leaves of olive tree are a hystorical Mediterranean herbal drug, used as a traditional remedy for health promotion and a therapy for chronic conditions.
		Related	9	Alzheimer's Disease	PRODUCES	tau Proteins	https://pubmed.ncbi.nlm.nih.gov/24059239/	The two molecular hallmarks of AD are amyloid plaques created from an amyloid precursor protein and hyperphosphorylated tau protein that is deposited as neurofibrillary tangles inside neurons.
		Related	10	Amyloid beta-Peptides	ASSOCIATED_WITH	Alzheimer Disease, Early Onset	https://pubmed.ncbi.nlm.nih.gov/7998778/	Amyloid beta protein levels in cerebrospinal fluid are elevated in early-onset Alzheimer's disease.
		Related	11	Amyloid beta-Peptides	CAUSES	ALZHEIMER DISEASE 5	https://www.ncbi.nlm.nih.gov/pmc/articles/PMC6946617/	The deposition of beta-amyloid is an initial step in the pathogenesis of AD.5 However, the exact role of amyloid deposition and neurofibrillary tangle formation in MCI has not been studied extensively.
		Related	12	Amyloid beta-Peptides	STIMULATES	Alzheimer's Disease	https://pubmed.ncbi.nlm.nih.gov/8761337/	Moreover, beta-amyloid was capable of inducing an AD-like phenotype for K+ channels and Cp20 in otherwise normal fibroblasts, providing additional evidence for the potential involvement of these components in AD and suggesting a possible pathological consequence of soluble beta-amyloid elevation in AD.
		Unrelated	13	LDL Cholesterol Lipoproteins	INHIBITS	cardiac event	https://www.ncbi.nlm.nih.gov/pmc/articles/PMC2545186/	Then the Lipid Research Program described a 21-17% reduction in coronary events when total and low density lipoprotein cholesterol levels were lowered by 13% and 20% with cholestyramine.3 Recently the postcoronary bypass Cholesterol Lowering Atherosclerosis Study showed considerable regression of plaques (16- 2 v 2 4%) and failure of progression or new formation when total cholesterol was lowered…
		Unrelated	14	Urokinase Plasminogen Activator Receptor	ASSOCIATED_WITH	tumor growth	https://pubmed.ncbi.nlm.nih.gov/10594855/	Considering recent findings that both urokinase plasminogen activator receptor (uPAR) and plasminogen activator inhibitors (PAIs) are involved in tumor growth through an urokinase-type plasminogen activator (uPA) activity-independent mechanism, the relation between the presence of these factors in tumor tissue and the clinicopathologic variables in colorectal carcinoma was reevaluated.
		Unrelated	15	New medications	TREATS	Hemorrhagic Disorders	https://www.ncbi.nlm.nih.gov/pmc/articles/PMC9020573/	Therefore, inhibiting the action of TFPI can be a strategy to be used in new drugs, such as concizumab, for the treatment of this hemorrhagic disease.
Quality score: 3 (though there are some detail mechanisms and logical inferences, one mechanism states that acamprosate increases lipid peroxidation, which is not a benefit in AD (process implicated in the pathogenesis of AD))		Unrelated	16	Interleukin 2 Receptor	STIMULATES	tumor growth	https://pubmed.ncbi.nlm.nih.gov/3113470/	Thus, serum IL-2R levels in tumour-bearing animals were dependent on the tumour line and influenced by the site and mode of tumour growth.
		Unrelated	17	therapeutic enzyme	TREATS	Mucopolysaccharidosis VII	https://pubmed.ncbi.nlm.nih.gov/16162667/	These results indicate that therapeutic enzyme can be delivered across the blood-brain barrier in the adult mucopolysaccharidosis type VII mouse if administered at higher doses than are used in conventional ERT trials and if the larger dose of enzyme is administered over a sufficient period.
Hypothesis (using supporting sentences and unrelated sentences)		Unrelated	18	Heat-Shock Proteins 70	INHIBITS	reproductive disorder	https://www.ncbi.nlm.nih.gov/pmc/articles/PMC4549060/	Our findings provide a new insight into the decreased expression of Hsp70 on day 90 of gestation and the increased expression of AFP on day 55 of gestation that are likely to play a role in the tissue homeostasis of obese Meishan ovaries and can meaningfully reduce the risk of reproductive disease and increase the ovulation rate.
Based on the available evidence, we hypothesize that acamprosate, a drug known to modulate the NMDA receptor, could potentially be used to treat Alzheimer's disease (AD) [1, 63]. The pathogenesis of AD is characterized by the deposition of beta-amyloid plaques and hyperphosphorylated tau protein, leading to neurofibrillary tangles inside neurons [9, 11, 50]. Beta-amyloid is generated from its pre…		Related	19	Receptor Binding	COEXISTS_WITH	Alzheimer's Disease	https://pubmed.ncbi.nlm.nih.gov/2867123/	Examination of somatostatin receptor binding in Alzheimer's disease and Huntington's disease may improve understanding of the role of somatostatin in both these illnesses.
		Related	20	tau Proteins	ASSOCIATED_WITH	Alzheimer's Disease	https://pubmed.ncbi.nlm.nih.gov/2424016/	Microtubule-associated protein tau (tau) is a major antigenic component of paired helical filaments in Alzheimer disease.
		Unrelated	21	caveolin 1	ASSOCIATED_WITH	aggressive cancer	https://pubmed.ncbi.nlm.nih.gov/23645736/	Increased plasma caveolin-1 levels are associated with progression of prostate cancer among Japanese men.
		Related	22	tau Proteins	INHIBITS	Alzheimer's Disease	https://pubmed.ncbi.nlm.nih.gov/17721707/	Furthermore, total tau protein levels were slightly decreased in both FTLD and AD as compared to control subjects.
		Unrelated	23	STEP 2	ASSOCIATED_WITH	Prune Belly Syndrome	https://www.ncbi.nlm.nih.gov/pmc/articles/PMC3733380/	Step 2 included the interaction terms involving PBS with each physical, mental, and social health variable.
		Related	24	Amyloid beta-Peptides	TREATS	Alzheimer's Disease	https://pubmed.ncbi.nlm.nih.gov/17105434/	The biology, structure and physiological properties of beta-amyloid peptide and related proteases (secretases) are discussed, as well as existing therapeutics and future strategies for the treatment of Alzheimer's disease.
		Unrelated	25	kinase inhibitor [EPC]	TREATS	Ulcerative Colitis	https://pubmed.ncbi.nlm.nih.gov/22945442/	IBD: Could oral Janus kinase inhibitor be a new drug treatment for active ulcerative colitis?
		Related	26	tau Proteins	ASSOCIATED_WITH	Familial Alzheimer Disease (FAD)	https://pubmed.ncbi.nlm.nih.gov/19782073/	In this work, we review the links between beta amyloid peptide, tau protein and GSK3 that occur in familial Alzheimer disease.
		Related	27	Amyloid beta-Peptides	COMPLICATES	Alzheimer's Disease	https://www.ncbi.nlm.nih.gov/pmc/articles/PMC7388140/	Elevated cortisol levels and HPA axis dysfunction are implicated in chronic stress, which releases amyloid beta (A ) that causes and/or worsens AD (109).
		Related	28	Amyloid beta-Peptides	ASSOCIATED_WITH	Alzheimer's Disease	https://pubmed.ncbi.nlm.nih.gov/3555492/	The mouse homolog of the human amyloid beta protein (AD-AP) gene is located on the distal end of mouse chromosome 16: further extension of the homology between human chromosome 21 and mouse chromosome 16.
		Unrelated	29	glutamine	INHIBITS	metabolic disturbance	https://pubmed.ncbi.nlm.nih.gov/16400059/	Metabolic effects of glutamine and glutamate ingestion in healthy subjects and in persons with chronic obstructive pulmonary disease.
		Related	30	Alzheimer's Disease	ASSOCIATED_WITH	Lipid Peroxidation	https://pubmed.ncbi.nlm.nih.gov/12396664/	This review describes the multiple correlations between the KP and the neuropathogenesis of Alzheimer's disease and highlights more particularly the aspects of QUIN neurotoxicity, emphasizing its roles in lipid peroxidation and the amplification of the local inflammation.
		Related	31	Amyloid beta-Peptides	ASSOCIATED_WITH	Familial Alzheimer Disease (FAD)	https://pubmed.ncbi.nlm.nih.gov/1465129/	Mutation of the beta-amyloid precursor protein in familial Alzheimer's disease increases beta-protein production.
		Related	32	Amyloid beta-Peptides	CAUSES	Alzheimer Disease 7	https://www.ncbi.nlm.nih.gov/pmc/articles/PMC2723955/	The techniques were applied to the detection of amyloid-beta derived diffusible ligands (ADDLs) which play an important role in the molecular pathogenesis of Alzheimer s Disease.7
		Unrelated	33	mRNA Vaccines	TREATS	aggressive cancer	https://www.ncbi.nlm.nih.gov/pmc/articles/PMC9416164/	The ability of mRNA vaccines to be manufactured and adjusted quickly is advantageous not only for the treatment of aggressive cancers but also for curtailing the spread of infectious diseases.
Quality score: 3 (though there are some detail mechanisms and logical inferences, one mechanism states that acamprosate increases lipid peroxidation, which is not a benefit in AD (process is linked to AD))		Related	34	Amyloid beta-Peptides	CAUSES	Familial Alzheimer Disease (FAD)	https://pubmed.ncbi.nlm.nih.gov/9562460/	The significance of amyloid beta protein, especially those ending at the 42nd residue (Abeta42), in the pathogenesis of familial Alzheimer's disease (FAD) linked to the mutations of presenilins, was examined by transfection studies using cultured cells and immunohistochemical analysis of autopsied brains.
		Unrelated	35	omega-3 fatty acids	INHIBITS	metabolic disturbance	https://pubmed.ncbi.nlm.nih.gov/21920060/	In conclusion, n-3 PUFA prevent some metabolic disturbances induced by high-fat diet and improve endothelial function in hamsters.
Hypothesis (using relations and unrelated relations)		Related	36	Lipid Peroxidation	COEXISTS_WITH	Familial Alzheimer Disease (FAD)	https://www.ncbi.nlm.nih.gov/pmc/articles/PMC2834848/	Oxidative stress induced lipid peroxidation in AD and FAD disrupts cellular homeostasis (Butterfield and Lauderback, 2002; Lauderback et al., 2001), such as loss of membrane asymmetry (Bader Lange et al., 2008; Castegna et al., 2004; Mohmmad Abdul and Butterfield, 2005).
Based on the provided evidence, we hypothesize that acamprosate may have therapeutic potential in the treatment of Alzheimer's disease. This hypothesis is supported by the association of acamprosate with receptor binding [1], which is known to coexist with Alzheimer's disease [19, 47]. Furthermore, acamprosate is associated with lipid peroxidation [58], a process that has been linked to Alzheimer…		Related	37	Amyloid beta-Peptides	ASSOCIATED_WITH	Alzheimer Disease, Late Onset	https://pubmed.ncbi.nlm.nih.gov/14692704/	The present study was carried out to examine the coincidence of these small vessel pathologies during the development of cognitive deficits, amyloid beta-protein (A beta) deposition, and neurofibrillary tangle (NFT) formation in sporadic late-onset AD.
		Related	38	Lipid Peroxidation	COEXISTS_WITH	ALZHEIMER DISEASE 17	https://www.ncbi.nlm.nih.gov/pmc/articles/PMC6775072/	The continuous line depicts the relationship between the probability threshold set in the model s prediction and its corresponding sensitivity and the dashed line represent the relationship between the probability threshold and the specificity.DiscussionThe reliable determination of lipid peroxidation products levels in urine samples from well-defined healthy and early AD participants, and the sa…
		Unrelated	39	Complement inhibition	CAUSES	Geographic Atrophy	https://www.ncbi.nlm.nih.gov/pmc/articles/PMC8230644/	Nevertheless, given the potential relationship between complement dysregulation and the risk of GA secondary to AMD, several studies (Figure 1) have examined whether complement inhibition may slow GA growth.
		Unrelated	40	Intrauterine contraceptives	INHIBITS	ovarian neoplasm	https://www.ncbi.nlm.nih.gov/pmc/articles/PMC7352306/	Literature also reports a consistent association between oral contraceptives assumption and reduction of OC risk, in particular when drugs are taken for a period 10 years [17,21,22,23]; particular effectiveness in risk prevention was observed when intrauterine contraceptives were used [24].
		Unrelated	41	olive oil	INHIBITS	tumor growth	https://www.ncbi.nlm.nih.gov/pmc/articles/PMC4495694/	Model group, mice were treated with olive oil at the same volume as the CFCT treatment group; PG, mice were treated with cytoxan (20 mg/kg); SG, mice were treated with saline at the same volume as the CFCT treatment group; HG, mice were treated with CFCT (100 mg/kg); MG, mice were treated with CFCT (50 mg/kg); LG, mice were treated with CFCT (20 mg/kg); CG, mice were treated with cytoxan (20 mg/k…
		Related	42	Amyloid beta-Peptides	ASSOCIATED_WITH	Alzheimer disease, familial, type 3	https://www.ncbi.nlm.nih.gov/pmc/articles/PMC8476544/	Although the physiological relevance of the fragments generated is not fully understood, one of these, the amyloid-beta peptide (A ) originating from the transmembrane domain of the APP protein, is the main component of brain amyloid plaques in Alzheimer s disease (AD)3,4.
		Unrelated	43	Protac	INHIBITS	Ovarian Failure, Premature	https://www.ncbi.nlm.nih.gov/pmc/articles/PMC5584562/	Unlike PROTACs, which recruit an E3 ligase to degrade a POI, some examples of small molecules that bind their target protein and cause its degradation have also been reported.
		Related	44	Amyloid beta-Peptides	ASSOCIATED_WITH	Alzheimer Disease 7	https://www.ncbi.nlm.nih.gov/pmc/articles/PMC7989959/	Aggregation and misfolding of amyloid-beta (A ) is a potential mechanism in AD patients.7 A monomers assemble into A O (A oligomers) and fibrils and are then distributed into the circulating blood or cerebrospinal fluid (CSF).1 The A O is neurotoxic and is highly correlated with severe AD.
		Related	45	Amyloid beta-Peptides	ASSOCIATED_WITH	ALZHEIMER DISEASE 18	https://www.ncbi.nlm.nih.gov/pmc/articles/PMC7864928/	Considering the potential functions of the PVS system, studies had proved that the PVS waste drainage system contributed to a larger portion of interstitial solutes clearance, such as amyloid beta (A ), preventing A deposition that was thought to be pathogenic in AD18,22.
		Related	46	tau Proteins	STIMULATES	Alzheimer's Disease	https://pubmed.ncbi.nlm.nih.gov/9147408/	Dependence of cerebrospinal fluid Tau protein levels on apolipoprotein E4 allele frequency in patients with Alzheimer's disease.
		Related	47	Alzheimer's Disease	ASSOCIATED_WITH	Receptor Binding	https://www.ncbi.nlm.nih.gov/pmc/articles/PMC1523198/	5-HT2A receptor binding is decreased in AD (for review, see [9,10]), and polymorphic variations have been described for the 5-HT2A gene that may be risk factors for hallucinations [20], aggression [21] and major depression [22] in AD.
		Unrelated	48	interleukin-10	ASSOCIATED_WITH	infertility tubal factor	https://pubmed.ncbi.nlm.nih.gov/12151439/	HLA DQ alleles and interleukin-10 polymorphism associated with Chlamydia trachomatis-related tubal factor infertility: a case-control study.
Quality score: 1 (no logical inferences. Very few detail mechanisms. No evidence to support hypothesis)		Unrelated	49	acetyl coenzyme A	STIMULATES	tumor growth	https://www.ncbi.nlm.nih.gov/pmc/articles/PMC9354823/	There is already evidence that both acetate and acetyl-CoA facilitate tumor growth by histone acetylation in yeast (Cai et al., 2011).
		Related	50	tau Proteins	CAUSES	Alzheimer's Disease	https://pubmed.ncbi.nlm.nih.gov/1527090/	It has been suggested that hyperphosphorylation of the tau protein in neurofibrillary tangles may be relevant to the etiology of Alzheimer's disease and that at least one of the hyperphosphorylated sites lies within a consensus sequence for the p34cdc2/cdc28 family of kinases.
Hypothesis (using no additional information)		Unrelated	51	Clusterin	ASSOCIATED_WITH	NEPHRITIS MEMBRANOUS	https://www.ncbi.nlm.nih.gov/pmc/articles/PMC5511063/	It has been reported that glomerular clusterin is variably expressed in human membranous nephritis, a major cause of nephrotic syndrome; it has also emerged as a factor influencing proteinuria and was associated with a reduction of proteinuria after a follow-up of 1.5 years.28,29 In this regard, mice lacking clusterin developed a progressive glomerulopathy characterized by the deposition of immun…
Hypothesis: Acamprosate, a drug primarily used in the treatment of alcohol dependence, may have potential therapeutic effects in Alzheimer's disease due to its neuroprotective and neuromodulatory properties. The pathogenesis of Alzheimer's disease is characterized by the accumulation of beta-amyloid plaques and neurofibrillary tangles, leading to neuronal loss and cognitive decline. Acamprosate i…		Related	52	Amyloid beta-Peptides	CAUSES	Alzheimer's Disease	https://pubmed.ncbi.nlm.nih.gov/2907602/	It is thus very tempting to speculate that a defect (or defects) of the amyloid beta protein gene is the cause of Alzheimer's disease.
		Related	53	Microhemorrhage	CAUSES	Alzheimer's Disease	https://pubmed.ncbi.nlm.nih.gov/31084613/	The majority of AD patients also have Abeta deposition in cerebral vessels known as cerebral amyloid angiopathy (CAA), microhemorrhages, and vascular co-morbidities, suggesting that cerebrovascular dysfunction contributes to AD etiology.
		Unrelated	54	Adapt (substance)	CAUSES	Intrusive thoughts	https://www.ncbi.nlm.nih.gov/pmc/articles/PMC6941845/	Difficulties in adapting to the challenges of primary treatment may result in increased anxiety and intrusive thoughts, depressive symptoms and negative affect, and social disruption, among others (Ganz et al., 2002; Stanton, 2006).
		Unrelated	55	creatinine	CAUSES	Irreversible renal failure	https://pubmed.ncbi.nlm.nih.gov/19183077/	The first case, a 16-year-old African American male with an absolute CD4+ cell count of 314 cells/mm(3), presented with an abrupt rise in serum creatinine leading to irreversible renal failure while on TDF-containing highly active antiretroviral therapy (HAART).
		Unrelated	56	Alloantigens	ASSOCIATED_WITH	Adenomatous Polyposis Coli	https://www.ncbi.nlm.nih.gov/pmc/articles/PMC3395995/	These data allow speculation that donor-specific Treg mediated suppression occurs primarily at sites of alloantigen expression and effector target tissue, and possibly acts through early interaction and modulation of APC function and effector cell recruitment, as implicated by other in vitro and in vivo studies (Golshayan et al., 2009; Herman et al., 2012).
		Unrelated	57	arginine	ASSOCIATED_WITH	Asthma chronic	https://www.ncbi.nlm.nih.gov/pmc/articles/PMC8622016/	In our study, we firstly focused on the Arginine pathway and their associated metabolites in young patients with chronic persistent asthma.
		Related	58	acamprosate	ASSOCIATED_WITH	Lipid Peroxidation	https://pubmed.ncbi.nlm.nih.gov/26642652/	Acamprosate caused 36% increase in stimulated lipid peroxidation only in NPF animals.
		Unrelated	59	Cola	CAUSES	gastric distress	https://pubmed.ncbi.nlm.nih.gov/10048625/	Significantly greater total gastric volumes (gas+ liquid) were associated with the ingestion of CC, and accordingly produced a greater severity of gastric distress, as evaluated with a gastric distress inventory.
		Related	60	Lipid Peroxidation	COEXISTS_WITH	Alzheimer Disease 7	https://www.ncbi.nlm.nih.gov/pmc/articles/PMC6435951/	Different studies have shown that nonsteroidal anti-inflammatory drugs (NSAIDs) may reduce the risk of developing AD.4,5 Pathological processes including inflammation, oxidative stress, apoptosis, mitochondrial dysfunction, and genetic factors lead to neuronal degeneration in Parkinson's disease (PD).6 It has been reported that excessive lipid peroxidation may destroy cholinergic neurons in AD7 a…
		Unrelated	61	Cadherin-2	ASSOCIATED_WITH	tumor growth	https://www.ncbi.nlm.nih.gov/pmc/articles/PMC3714178/	The increased survival of the KPC Ncad /+ mice is especially exciting as the N-cadherin antagonist ADH-1 was recently shown to block tumor growth, invasion and metastasis in an orthotopic pancreatic cancer model (14).
		Unrelated	62	Rhodiola extract	TREATS	Chronic Fatigue Syndrome	https://pubmed.ncbi.nlm.nih.gov/19500070/	Strong scientific evidence is available for Rhodiola rosea SHR-5 extract, which improved attention, cognitive function and mental performance in fatigue and in chronic fatigue syndrome.
Quality score: 2 (makes some logical inferences, but no evidence to support statements)		Related	63	acamprosate	ASSOCIATED_WITH	N-methyl-D-aspartate selective glutamate receptor activity	https://pubmed.ncbi.nlm.nih.gov/9660304/	The results show that acamprosate binds to a specific spermidine-sensitive site that modulates the NMDA receptor in a complex way.
		Related	64	Amyloid beta-Peptides	ASSOCIATED_WITH	Alzheimer Disease 12	https://www.ncbi.nlm.nih.gov/pmc/articles/PMC2773287/	It is hypothesized that high concentrations of glutamate cause an excess calcium influx through the ion channel that leads to excitotoxicity.10 It has been shown in AD patients that glutamate transporters in glial cells are reduced, while the presence of beta amyloid indirectly stimulates excessive glutamate production.11 This phenomenon is thought to contribute to the neurotoxicity of beta amylo…
(Highlight in red: incorrect citations)		Unrelated	65	Connexins	ASSOCIATED_WITH	tumor growth	https://pubmed.ncbi.nlm.nih.gov/14598507/	We believe that further studies of connexins' mutation changes in tumor growth is a promising trend in research of its etiology and pathogenesis and in designing new methods of diagnostics and treatment of colonic and other gastrointestinal cancers.
		Related	66	Microhemorrhage	COEXISTS_WITH	Alzheimer's Disease	https://pubmed.ncbi.nlm.nih.gov/21392891/	CAA and cerebral microhemorrhages in AD have similar spatial distribution of lobar predominance, and their accumulation similarly affect cognitive function.
		Unrelated	67	embryonic antigen	CAUSES	Malignant Neoplasms	https://www.ncbi.nlm.nih.gov/pmc/articles/PMC6366552/	It was also combined with a novel biomimetic material as sensing element that was designed to target CEA, a cancer biomarker.
		Related	68	Amyloid beta-Peptides	ASSOCIATED_WITH	Alzheimer Disease 9	https://www.ncbi.nlm.nih.gov/pmc/articles/PMC3622466/	Cognition and its decline associated with brain aging also seems to be variable and possibly open to modifications.1 Studies in humans and animal models suggest that age-related cognitive decline is more likely to be associated with alterations in synaptic connectivity than with neuronal loss and white matter changes.6,7 According to recent studies, alterations of intracellular -secretase mediate…
		Unrelated	69	dexmedetomidine	ASSOCIATED_WITH	AL-RAQAD SYNDROME	https://www.ncbi.nlm.nih.gov/pmc/articles/PMC4186414/	We also demonstrated that peripheral 2-AR agonist fadolmidine did not protect kidneys, thus suggesting that the protective effects of Dex are, to some extent, mediated via central 2-ARs.
		Unrelated	70	chloroacetamide	CAUSES	Allergic skin reaction	https://www.ncbi.nlm.nih.gov/pmc/articles/PMC8503661/	2-chloroacetamide is toxic upon ingestion, may cause an allergic skin reaction, and a suspected reproductive toxin.
		Unrelated	71	methylate	ASSOCIATED_WITH	Diabetes Mellitus	https://www.ncbi.nlm.nih.gov/pmc/articles/PMC5968593/	The 19,679 DML were associated with 304 genes that were then used in IPA analysis (Additional file 4: Table S2).IPA analysis identified a cluster of differentially methylated genes that were strongly related to diabetes mellitus, glucose metabolism, lipid metabolism, obesity, and insulin resistance (Fig. 3), including hypermethylated genes such as Akt1, which regulates glucose uptake into muscle …
		Related	72	Lipid Peroxidation	COEXISTS_WITH	Alzheimer's Disease	https://pubmed.ncbi.nlm.nih.gov/2630382/	Lipid peroxidation and free radical scavengers in Alzheimer's disease.
		Unrelated	73	Glycation End Products, Advanced	STIMULATES	Combined hyperlipidemia	https://pubmed.ncbi.nlm.nih.gov/23604797/	Age-dependent accumulation of advanced glycation endproducts is accelerated in combined hyperlipidemia and hyperglycemia, a process attenuated by L-arginine.
		Related	74	Amyloid beta-Peptides	CAUSES	Alzheimer Disease, Early Onset	https://pubmed.ncbi.nlm.nih.gov/10230703/	Genetic studies on some families have shown that mutations in the genes encoding beta-amyloid precursor protein and presenilins 1 and 2 are responsible for early-onset AD.
		Unrelated	75	cocaine	CAUSES	Malignant syndrome NOS	https://pubmed.ncbi.nlm.nih.gov/7955717/	There have been only a few reports on malignant syndrome due to cocaine, and there have been no reports on leukoencephalopathy due to cocaine or malignant syndrome.
		Unrelated	76	uro-vaxom	INHIBITS	Urinary tract infection	https://www.ncbi.nlm.nih.gov/pmc/articles/PMC6469220/	This study will investigate whether Uro-Vaxom reduces the incidence of symptomatic UTIs in people with neurogenic bladder dysfunction due to SCI, cauda equina syndrome, transverse myelitis or multiple sclerosis.
		Related	77	Amyloid beta-Peptides	CAUSES	Alzheimer Disease, Late Onset	https://www.ncbi.nlm.nih.gov/pmc/articles/PMC4045094/	In this study, we investigate the influence of interactions between genes previously associated with Alzheimer s Disease (AD) on amyloid-beta (A ) load in an effort to better understand the genetic etiology of A deposition and, by extension, risk for LOAD.
		Related	78	N-methyl-D-aspartate selective glutamate receptor activity	COEXISTS_WITH	Alzheimer's Disease	https://pubmed.ncbi.nlm.nih.gov/2481321/	Energy-related neurotoxicity at the NMDA receptor: a possible role in Alzheimer's disease and related disorders.
		Related	79	Familial Alzheimer Disease (FAD)	ASSOCIATED_WITH	Lipid Peroxidation	https://www.ncbi.nlm.nih.gov/pmc/articles/PMC2766522/	The prostaglandins PGE2, PGD2, PGF2 , PGI2, and TXA2 are lipid messengers that bind to classes of G-protein-coupled receptors designated EP (for E-prostanoid receptor), FP, DP, IP, and TP receptors.16 Recent studies demonstrate that the PGE2 EP2 receptor promotes inflammatory injury in models of innate immunity in Alzheimer s disease.17 19 The EP2 receptor mediates a dominant component of oxidati…
		Related	80	Amyloid beta-Peptides	ASSOCIATED_WITH	Alzheimer Disease 11	https://www.ncbi.nlm.nih.gov/pmc/articles/PMC4040417/	Impaired mitochondrial protein import due to the amyloid beta peptide (A ) has been observed in Alzheimer s disease (AD)11, suggesting that mutant htt may cause a similar dysfunction in yeast.

## Sheet: Pimavanserin
Hypothesis (using supporting sentences)		(Un)Related	Ref	Subject Entity Name	Relation type	Object Entity Name	URL	Sentence
Based on the evidence provided, it can be hypothesized that pimavanserin may treat Alzheimer's disease (AD) by reducing amyloid-beta (Abeta) levels and tau phosphorylation, both of which are key pathological features of AD. Abeta is generated from the amyloid precursor protein by gamma-secretase [53,1] and its deposition is an initial step in the pathogenesis of AD [36]. Abeta levels are elevated…		Related	1	Amyloid beta-Peptides	ASSOCIATED_WITH	Alzheimer disease, familial, type 3	https://www.ncbi.nlm.nih.gov/pmc/articles/PMC8476544/	Although the physiological relevance of the fragments generated is not fully understood, one of these, the amyloid-beta peptide (A ) originating from the transmembrane domain of the APP protein, is the main component of brain amyloid plaques in Alzheimer s disease (AD)3,4.
		Unrelated	2	arsenal	TREATS	Giardiasis	https://www.ncbi.nlm.nih.gov/pmc/articles/PMC2766634/	Nitazoxanide (2, Figure 1) belongs to an emerging class of 5-nitrothiazole compounds with potent antigiardial activity,10 although Giardia lines resistant to Mz are cross-resistant to nitazoxanide.9 Overall, Mz remains the standard treatment for giardiasis to date, making the discovery and development of new therapeutics an important goal in expanding the arsenal of antibiotics for controlling th…
		Unrelated	3	Interleukin-1	ASSOCIATED_WITH	Addicted to heroin	https://www.ncbi.nlm.nih.gov/pmc/articles/PMC9308521/	IFN- (patient group: 20.81 37.50 versus control group: 1.87 1.40) and IL-1 (patient group: 19.23 18.09 versus control group: 12.01 1.47) were not significantly different between the two groups, but we can see that the levels are slightly higher in heroin addicts than in healthy controls.
		Unrelated	4	Adrenergic alpha-Antagonists	CAUSES	INTRATUMORAL BLEED	https://www.ncbi.nlm.nih.gov/pmc/articles/PMC6043816/	Alpha adrenergic blockers are the mainstay of treatment of hypertension due to pheochromocytoma.3 However it has been suggested that alpha adrenergic blockers can cause intratumoral hemorrhage and avascular necrosis.4 The effect is proposed to be due to lowered systemic BP causing the already precarious circulation within the tumor to become inadequate causing necrosis.
		Related	5	Phosphorylation	COEXISTS_WITH	Alzheimer Disease 9	https://www.ncbi.nlm.nih.gov/pmc/articles/PMC6907052/	These biochemical and immunohistochemically analyses indicate a temporal causal relationship between Artemether therapy and reduced amyloid- deposition and phosphorylation of tau pathologies in 3xTg-AD mice.3.9.
		Unrelated	6	Vasodilator Agents	TREATS	Group 5 pulmonary hypertension	https://www.ncbi.nlm.nih.gov/pmc/articles/PMC8641504/	Her history suggests that the use of the PAH-specific vasodilator drugs is worth further investigation in Group 5-PH patients.
		Related	7	Alzheimer's Disease	ASSOCIATED_WITH	Phosphorylation	https://pubmed.ncbi.nlm.nih.gov/8746795/	Abnormal phosphorylation by PKC as well as reduced levels of PKC has been implicated in the neurodegeneration associated with AD and aging.
		Unrelated	8	fusion transcript	ASSOCIATED_WITH	B-Cell Lymphomas	https://www.ncbi.nlm.nih.gov/pmc/articles/PMC6788943/	These findings suggest that the protective mechanism causes a critical failure to eliminate aberrant BCL2:IGH fusion transcripts in B cell lymphomas and may also contribute to the survival of the many cancers that rely on BCL2 overexpression (Czabotar et al. 2014).
		Related	9	pimavanserin	ASSOCIATED_WITH	Phosphorylation	https://www.ncbi.nlm.nih.gov/pmc/articles/PMC8804623/	Finally, as serotonin promoting medications have been shown to reduce tau phosphorylation in P301L mice, 31 and as pimavanserin has very recently been shown to suppress A and improve cognitive function in APP/PS1 mice, 32 we quantified tau phosphorylation in the P301L/COMT and rTg(P301L)4510 mice after treatment with pimavanserin to determine whether there is an impact on tau phosphorylation.
		Unrelated	10	Tranquilizing Agents	ASSOCIATED_WITH	anti social	https://www.ncbi.nlm.nih.gov/pmc/articles/PMC2854527/	On the other hand, rather conflicting data exist on the effects of anxiolytic drugs on anti-social and aggressive behaviours.
		Unrelated	11	INVESTIGATIONAL AGENTS	ASSOCIATED_WITH	Uveitis	https://www.ncbi.nlm.nih.gov/pmc/articles/PMC9290889/	Recent literature suggests switching to another type of anti TNF , tocilizumab, or other more experimental agents in paediatric uveitis such as abatacept, rituximab or a Janus kinase inhibitor (Maccora et al. 2020; Thau et al. 2018; Wennink et al. 2020).
		Unrelated	12	kinase inhibitor [EPC]	TREATS	Carcinoma breast stage IV	https://pubmed.ncbi.nlm.nih.gov/23239465/	These data raise a concern about the use of systemic LIMK inhibitors for the treatment of metastatic breast cancer.
		Unrelated	13	Basis	TREATS	Bladder Exstrophy	https://pubmed.ncbi.nlm.nih.gov/3135623/	Anatomic basis for the orthopedic treatment of bladder exstrophy: anatomic study of the sacrosciatic ligaments in the newborn.
Quality score: 4 (good logical inferences and detail mechanisms against the hallmarks of AD, amyloid beta-peptides and tau phosphorylation. Gives references to support statements)		Related	14	Amyloid beta-Peptides	ASSOCIATED_WITH	Alzheimer Disease, Early Onset	https://pubmed.ncbi.nlm.nih.gov/7998778/	Amyloid beta protein levels in cerebrospinal fluid are elevated in early-onset Alzheimer's disease.
		Related	15	Amyloid beta-Peptides	COMPLICATES	Alzheimer's Disease	https://www.ncbi.nlm.nih.gov/pmc/articles/PMC7388140/	Elevated cortisol levels and HPA axis dysfunction are implicated in chronic stress, which releases amyloid beta (A ) that causes and/or worsens AD (109).
Hypothesis (using supporting sentences and unrelated sentences)		Unrelated	16	Stimulant	TREATS	hyperactive child	https://pubmed.ncbi.nlm.nih.gov/6117367/	It is concluded that the large body of research on the use of stimulants for hyperactive children has finally answered some long standing questions, but many gaps of knowledge remain and further research is required.
Based on the evidence provided, it can be hypothesized that pimavanserin, a serotonin promoting medication, may have therapeutic potential in the treatment of Alzheimer's disease (AD) through its impact on tau phosphorylation and amyloid-beta (Aβ) pathology. The pathological hallmarks of AD include the accumulation of amyloid plaques, primarily composed of Aβ peptides, and neurofibrillary tangles…		Related	17	Alzheimer's Disease	PRODUCES	tau Proteins	https://pubmed.ncbi.nlm.nih.gov/24059239/	The two molecular hallmarks of AD are amyloid plaques created from an amyloid precursor protein and hyperphosphorylated tau protein that is deposited as neurofibrillary tangles inside neurons.
		Unrelated	18	Uricosuric Agents	CAUSES	Hepatic impairment	https://www.ncbi.nlm.nih.gov/pmc/articles/PMC7066281/	These results also support the contention that dotinurad is less likely than other antihyperuricemic agents to cause hepatic impairment.
		Related	19	Microhemorrhage	CAUSES	Alzheimer's Disease	https://pubmed.ncbi.nlm.nih.gov/31084613/	The majority of AD patients also have Abeta deposition in cerebral vessels known as cerebral amyloid angiopathy (CAA), microhemorrhages, and vascular co-morbidities, suggesting that cerebrovascular dysfunction contributes to AD etiology.
		Related	20	Amyloid beta-Peptides	STIMULATES	Alzheimer's Disease	https://pubmed.ncbi.nlm.nih.gov/8761337/	Moreover, beta-amyloid was capable of inducing an AD-like phenotype for K+ channels and Cp20 in otherwise normal fibroblasts, providing additional evidence for the potential involvement of these components in AD and suggesting a possible pathological consequence of soluble beta-amyloid elevation in AD.
		Related	21	Amyloid beta-Peptides	CAUSES	Familial Alzheimer Disease (FAD)	https://pubmed.ncbi.nlm.nih.gov/9562460/	The significance of amyloid beta protein, especially those ending at the 42nd residue (Abeta42), in the pathogenesis of familial Alzheimer's disease (FAD) linked to the mutations of presenilins, was examined by transfection studies using cultured cells and immunohistochemical analysis of autopsied brains.
		Related	22	Amyloid beta-Peptides	ASSOCIATED_WITH	Alzheimer Disease, Late Onset	https://pubmed.ncbi.nlm.nih.gov/14692704/	The present study was carried out to examine the coincidence of these small vessel pathologies during the development of cognitive deficits, amyloid beta-protein (A beta) deposition, and neurofibrillary tangle (NFT) formation in sporadic late-onset AD.
		Unrelated	23	dextromethorphan	TREATS	tumor growth	https://www.ncbi.nlm.nih.gov/pmc/articles/PMC4796806/	Although the mechanism underlying the effects of DEX on the migration of macrophage as well as the suppression of tumor growth was not fully elucidated in this study, we may postulate this phenomenon as follows: Because DEX treatment may result in the decrease of the proinflammatory cytokines at the site of tumor and in serums, the number of macrophages migrated to tumor lesion may be reduced.
		Related	24	Amyloid beta-Peptides	ASSOCIATED_WITH	Alzheimer Disease 9	https://www.ncbi.nlm.nih.gov/pmc/articles/PMC3622466/	Cognition and its decline associated with brain aging also seems to be variable and possibly open to modifications.1 Studies in humans and animal models suggest that age-related cognitive decline is more likely to be associated with alterations in synaptic connectivity than with neuronal loss and white matter changes.6,7 According to recent studies, alterations of intracellular -secretase mediate…
		Related	25	Phosphorylation	COEXISTS_WITH	Alzheimer's Disease	https://pubmed.ncbi.nlm.nih.gov/3159022/	Aberrant neurofilament phosphorylation in Alzheimer disease.
		Unrelated	26	pomegranate extract	TREATS	Periodontal Diseases	https://www.ncbi.nlm.nih.gov/pmc/articles/PMC6138925/	Delivery of thyA gene [40], Punica granatum extract [41], H. madagascariensis leaf extract [42], miR-146a [43], and the anti-inflammatory agent 15d-PGJ2 [44] have been investigated to vaccinate against and target periodontal diseases.
		Unrelated	27	interleukin-10	CAUSES	cardiac event	https://pubmed.ncbi.nlm.nih.gov/16159607/	Elevated concentrations of CRP and IL-10 at baseline also increased the risk of late cardiac events (RR 2.5, CI 1.1-5.7, p 0.04 and RR 2.5, CI 1.1-5.6, p 0.03) as did IL-1 receptor antagonist at 6 months (RR 2.6, CI 1.1-6.1, p 0.04).
		Unrelated	28	Immunomodulatory IMiD Drugs	TREATS	incurable diseases	https://pubmed.ncbi.nlm.nih.gov/32976949/	Understanding the molecular and cellular mechanisms underlying IMiD efficacy and resistance may allow development of specific strategies to eliminate the malignant clone in otherwise incurable diseases.
		Related	29	tau Proteins	INHIBITS	Alzheimer's Disease	https://pubmed.ncbi.nlm.nih.gov/17721707/	Furthermore, total tau protein levels were slightly decreased in both FTLD and AD as compared to control subjects.
		Unrelated	30	BPS	CAUSES	Hydrothorax	https://www.ncbi.nlm.nih.gov/pmc/articles/PMC5828905/	Extralobar BPSs were more likely to cause hydrothorax than intralobar BPSs, and all cases of hydrops were associated with an extralobar BPS.
		Related	31	Amyloid beta-Peptides	ASSOCIATED_WITH	Alzheimer Disease 11	https://www.ncbi.nlm.nih.gov/pmc/articles/PMC4040417/	Impaired mitochondrial protein import due to the amyloid beta peptide (A ) has been observed in Alzheimer s disease (AD)11, suggesting that mutant htt may cause a similar dysfunction in yeast.
Quality score: 4 (good logical inferences and detail mechanisms against the hallmarks of AD, amyloid beta-peptides and tau phosphorylation. Gives references to support statements)		Unrelated	32	CBL0137	ASSOCIATED_WITH	tumor growth	https://www.ncbi.nlm.nih.gov/pmc/articles/PMC6946866/	Tumor growth curve showed that single agent treatment with 5-FU, QC or CBL0137 alone had very little or moderate effect on tumor growth compared to vehicle group (Fig. 5A 5D, S5A 5D), while combination group significantly inhibited tumor growth, demonstrating a synergistic effect.
		Unrelated	33	CDB 4124	INHIBITS	Precancerous lesion	https://pubmed.ncbi.nlm.nih.gov/21119048/	Taken together, these data indicate that CDB-4124 can suppress the development of precancerous lesions and carcinogen-induced ER(+) mammary tumors in rats, and may have implications for prevention and treatment of human breast cancer.
Hypothesis (using relations and unrelated relations)		Unrelated	34	Ginkgo biloba extract	TREATS	Demented	https://www.ncbi.nlm.nih.gov/pmc/articles/PMC6535827/	GBE has been found particularly efficacious in demented people with neuropsychiatric symptoms (NPS) [64, 65].
Based on the provided evidence, we hypothesize that pimavanserin may be a potential therapeutic agent for Alzheimer's disease. This hypothesis is supported by the association of pimavanserin with phosphorylation [9], a process that coexists with Alzheimer's disease [25, 46, 47]. Furthermore, Alzheimer's disease is associated with the production of tau proteins [17] and amyloid beta-peptides [1, 1…		Unrelated	35	Phosphatidylserines	CAUSES	tumor growth	https://pubmed.ncbi.nlm.nih.gov/22191000/	Irradiation of the gliomas increased PS exposure on both tumor vascular endothelial cells and tumor cells and gave rise to an increase in tumor contrast with 800CW-PGN635 that was predictive of the reduction in tumor growth.
		Related	36	Amyloid beta-Peptides	CAUSES	ALZHEIMER DISEASE 5	https://www.ncbi.nlm.nih.gov/pmc/articles/PMC6946617/	The deposition of beta-amyloid is an initial step in the pathogenesis of AD.5 However, the exact role of amyloid deposition and neurofibrillary tangle formation in MCI has not been studied extensively.
		Related	37	tau Proteins	STIMULATES	Alzheimer's Disease	https://pubmed.ncbi.nlm.nih.gov/9147408/	Dependence of cerebrospinal fluid Tau protein levels on apolipoprotein E4 allele frequency in patients with Alzheimer's disease.
		Related	38	tau Proteins	ASSOCIATED_WITH	Familial Alzheimer Disease (FAD)	https://pubmed.ncbi.nlm.nih.gov/19782073/	In this work, we review the links between beta amyloid peptide, tau protein and GSK3 that occur in familial Alzheimer disease.
		Related	39	Amyloid beta-Peptides	ASSOCIATED_WITH	Alzheimer's Disease	https://pubmed.ncbi.nlm.nih.gov/3555492/	The mouse homolog of the human amyloid beta protein (AD-AP) gene is located on the distal end of mouse chromosome 16: further extension of the homology between human chromosome 21 and mouse chromosome 16.
		Unrelated	40	methylate	ASSOCIATED_WITH	Endometriosis	https://www.ncbi.nlm.nih.gov/pmc/articles/PMC4603532/	The functional outcomes of these findings were explored by defining DNMT3B occupation at known differentially methylated loci in two key genes affecting endometriosis: ESR1 and SF-1.
		Unrelated	41	Selective Serotonin Reuptake Inhibitors	ASSOCIATED_WITH	tumor growth	https://www.ncbi.nlm.nih.gov/pmc/articles/PMC9408912/	Studies have provided conflicting results on the effects of SSRIs on tumor growth [6,7,8,9,11,12].
		Unrelated	42	therapeutic protein	TREATS	Malignant Glioma	https://www.ncbi.nlm.nih.gov/pmc/articles/PMC6817450/	Our data support a potential clinical translation as motile MSCs represent an ideal platform technology for the targeted delivery of various therapeutic gene products in malignant glioma.
		Unrelated	43	Fatty acid glycerol esters	ASSOCIATED_WITH	tumor growth	https://pubmed.ncbi.nlm.nih.gov/1791730/	In an experimental study with sprague-dawley-rats we tested the effect of parenteral substituted LCT-fats on tumor growth of the Yoshida sarcoma in its ascites form.
		Related	44	Amyloid beta-Peptides	CAUSES	Alzheimer Disease 7	https://www.ncbi.nlm.nih.gov/pmc/articles/PMC2723955/	The techniques were applied to the detection of amyloid-beta derived diffusible ligands (ADDLs) which play an important role in the molecular pathogenesis of Alzheimer s Disease.7
		Related	45	Amyloid beta-Peptides	CAUSES	Alzheimer Disease, Early Onset	https://pubmed.ncbi.nlm.nih.gov/10230703/	Genetic studies on some families have shown that mutations in the genes encoding beta-amyloid precursor protein and presenilins 1 and 2 are responsible for early-onset AD.
		Related	46	Phosphorylation	COEXISTS_WITH	Alzheimer Disease 13	https://www.ncbi.nlm.nih.gov/pmc/articles/PMC8935215/	For example, miR-326 has been shown to decrease tau phosphorylation and neuronal apoptosis in AD 13.
		Related	47	Phosphorylation	COEXISTS_WITH	Alzheimer Disease 11	https://www.ncbi.nlm.nih.gov/pmc/articles/PMC8595611/	Thus, tau phosphorylation and spreading may represent ideal therapeutic targets in AD11, 12, while tau-related outcome measures may be generally useful for trials of potential disease-modifying therapies.
		Unrelated	48	Experimental drug	ASSOCIATED_WITH	Hepatic impairment	https://www.ncbi.nlm.nih.gov/pmc/articles/PMC3971785/	Exclusion criteria were any renal or hepatic impairment, neurological disorder impairing accurate pain assessment, sensitivity to any trial drug, requirement for premedication and other analgesics administered on the day of surgery.
Quality score: 2 (some detail mechanisms mentioned and logical inferences made, though no references to support statements)		Related	49	Amyloid beta-Peptides	TREATS	Alzheimer's Disease	https://pubmed.ncbi.nlm.nih.gov/17105434/	The biology, structure and physiological properties of beta-amyloid peptide and related proteases (secretases) are discussed, as well as existing therapeutics and future strategies for the treatment of Alzheimer's disease.
		Related	50	Amyloid beta-Peptides	ASSOCIATED_WITH	ALZHEIMER DISEASE 18	https://www.ncbi.nlm.nih.gov/pmc/articles/PMC7864928/	Considering the potential functions of the PVS system, studies had proved that the PVS waste drainage system contributed to a larger portion of interstitial solutes clearance, such as amyloid beta (A ), preventing A deposition that was thought to be pathogenic in AD18,22.
Hypothesis (using no additional information)		Related	51	Amyloid beta-Peptides	ASSOCIATED_WITH	Alzheimer Disease 12	https://www.ncbi.nlm.nih.gov/pmc/articles/PMC2773287/	It is hypothesized that high concentrations of glutamate cause an excess calcium influx through the ion channel that leads to excitotoxicity.10 It has been shown in AD patients that glutamate transporters in glial cells are reduced, while the presence of beta amyloid indirectly stimulates excessive glutamate production.11 This phenomenon is thought to contribute to the neurotoxicity of beta amylo…
Pimavanserin, a selective serotonin inverse agonist, primarily targets the 5-HT2A receptor, which is known to play a significant role in various neuropsychiatric disorders. The hypothesis for its potential efficacy in treating Alzheimer's disease could be based on the premise that the modulation of serotonergic signaling can influence the pathophysiology of Alzheimer's. Specifically, pimavanserin…		Related	52	Amyloid beta-Peptides	CAUSES	Alzheimer's Disease	https://pubmed.ncbi.nlm.nih.gov/2907602/	It is thus very tempting to speculate that a defect (or defects) of the amyloid beta protein gene is the cause of Alzheimer's disease.
		Related	53	Amyloid beta-Peptides	INHIBITS	Alzheimer's Disease	https://pubmed.ncbi.nlm.nih.gov/19723623/	Therefore, the inhibitory effect of PEDF appears to be mediated via the processing of VEGF-R2 by gamma-secretase. gamma-Secretase generates the amyloid-beta (Abeta) peptide of Alzheimer disease from its precursor (amyloid precursor protein).
		Related	54	Amyloid beta-Peptides	ASSOCIATED_WITH	Alzheimer Disease 7	https://www.ncbi.nlm.nih.gov/pmc/articles/PMC7989959/	Aggregation and misfolding of amyloid-beta (A ) is a potential mechanism in AD patients.7 A monomers assemble into A O (A oligomers) and fibrils and are then distributed into the circulating blood or cerebrospinal fluid (CSF).1 The A O is neurotoxic and is highly correlated with severe AD.
		Related	55	Amyloid beta-Peptides	CAUSES	Alzheimer Disease, Late Onset	https://www.ncbi.nlm.nih.gov/pmc/articles/PMC4045094/	In this study, we investigate the influence of interactions between genes previously associated with Alzheimer s Disease (AD) on amyloid-beta (A ) load in an effort to better understand the genetic etiology of A deposition and, by extension, risk for LOAD.
		Unrelated	56	androgenic steroid	CAUSES	Angiosarcoma of liver	https://www.ncbi.nlm.nih.gov/pmc/articles/PMC9181818/	Exposure to vinyl chloride monomer (VCM), inorganic arsenic, thorotrast, and the use of androgenic steroids are described as risk factors for PHA, but the main etiology remains unclear [11,12].
		Unrelated	57	Complement inhibition	ASSOCIATED_WITH	Neoplasms	https://www.ncbi.nlm.nih.gov/pmc/articles/PMC8016081/	Reduced tumor growth in the absence of Tregs during C3aR and C5aR1 inhibition lends credence to the idea of complement inhibition being a potential new therapeutic strategy, capable of delivering durable tumor control when combined with anti-Treg therapy and RT.
		Related	58	tau Proteins	CAUSES	Alzheimer's Disease	https://pubmed.ncbi.nlm.nih.gov/1527090/	It has been suggested that hyperphosphorylation of the tau protein in neurofibrillary tangles may be relevant to the etiology of Alzheimer's disease and that at least one of the hyperphosphorylated sites lies within a consensus sequence for the p34cdc2/cdc28 family of kinases.
		Unrelated	59	genetic vaccine	INHIBITS	Allergic sensitization	https://www.ncbi.nlm.nih.gov/pmc/articles/PMC4130253/	Both, regulatory33-35 as well as Th123-25 T-cell responses have been shown to be induced by genetic vaccines, protecting from allergic sensitization in animal models.
		Related	60	Microhemorrhage	COEXISTS_WITH	Alzheimer's Disease	https://pubmed.ncbi.nlm.nih.gov/21392891/	CAA and cerebral microhemorrhages in AD have similar spatial distribution of lobar predominance, and their accumulation similarly affect cognitive function.
		Unrelated	61	methylate	CAUSES	Hyperglycemia	https://pubmed.ncbi.nlm.nih.gov/324024/	Oral administration of 4-diphenylmethylpiperidine and its N-methylated derivative (130 and 260 micronmoles/kg) to rats for 14 days resulted in hyperglycemia, reduced pancreatic insulin content and the formation of large vacuoles in the cytoplasm of pancreatic islet cells.
		Unrelated	62	WITHANIA SOMNIFERA	TREATS	Tauopathies	https://www.ncbi.nlm.nih.gov/pmc/articles/PMC7789572/	Furthermore, the antidementia potential of WS in mice model of AD shows upregulation of low-density lipoprotein receptor in AD pathology reversal and improved cognitive functioning [183], all pointing at the neuroprotective potential of WS in the amelioration of neurodegenerative tauopathies.
		Related	63	pimavanserin	INHIBITS	Amyloid beta-Peptides	https://pubmed.ncbi.nlm.nih.gov/33278025/	Chronic administration of Pimavanserin by subcutaneous osmotic pump to aged APP/PS1 mice significantly reduced CSF Abeta levels and Abeta pathology and improved cognitive function in these mice.
Quality score: 2 (few detail mechanisms, no evidence to support hypothesis)		Related	64	Amyloid beta-Peptides	ASSOCIATED_WITH	Familial Alzheimer Disease (FAD)	https://pubmed.ncbi.nlm.nih.gov/1465129/	Mutation of the beta-amyloid precursor protein in familial Alzheimer's disease increases beta-protein production.
		Related	65	Phosphorylation	COEXISTS_WITH	Familial Alzheimer Disease (FAD)	https://www.ncbi.nlm.nih.gov/pmc/articles/PMC5709977/	Our findings demonstrate that increased TAU phosphorylation occurs in fAD and sAD iPSC-derived mature neurons.
(Highlight in red: incorrect citations)		Related	66	tau Proteins	ASSOCIATED_WITH	Alzheimer's Disease	https://pubmed.ncbi.nlm.nih.gov/2424016/	Microtubule-associated protein tau (tau) is a major antigenic component of paired helical filaments in Alzheimer disease.
		Unrelated	67	Anti-platelet antibody	ASSOCIATED_WITH	HIV thrombocytopenia	https://pubmed.ncbi.nlm.nih.gov/1974174/	Autoantibodies against peripheral blood cells appear early in HIV infection and their prevalence increases with disease progression.
		Unrelated	68	Migration Inhibitory Factor	ASSOCIATED_WITH	Leprosy--Patients	https://www.ncbi.nlm.nih.gov/pmc/articles/PMC5816948/	Recently, Bansal et al. measured MIF levels in leprosy patients and they also found that the MIF levels in serum are similar between healthy controls and patients presenting LL, borderline lepromatous, or borderline tuberculoid (17).
		Unrelated	69	NF-kappa B	CAUSES	vascular inflammations	https://pubmed.ncbi.nlm.nih.gov/16413026/	Alpha-lipoic acid inhibits fractalkine expression and prevents neointimal hyperplasia after balloon injury in rat carotid artery.
		Unrelated	70	Human interleukin-2	INHIBITS	Keratitis, Herpetic	https://pubmed.ncbi.nlm.nih.gov/11095617/	The goal of this study was to evaluate the effectiveness of a local plasmid DNA vaccine encoding herpes simplex virus (HSV) type 1 glycoprotein D (gD) or gD-interleukin (IL)-2 (chimeric gene of gD and human IL-2) in preventing murine herpetic keratitis.
		Unrelated	71	palmitic acid	CAUSES	metabolic disturbance	https://www.ncbi.nlm.nih.gov/pmc/articles/PMC4195604/	Our findings suggest that excessive fat contributes to metabolic disturbances such as insulin resistance, elevated blood pressure and triglycerides, which initially appear to be inversely related to skeletal parameters, at least in men.

## Sheet: ST-101
Hypothesis (using supporting sentences)		(Un)Related	Ref	Subject Entity Name	Relation type	Object Entity Name	URL	Sentence
Based on the evidence provided, we hypothesize that ST-101 may treat Alzheimer's disease (AD) by modulating the IL-33/ST2 signaling pathway and enhancing CaMKII activity in the brain. The IL-33/ST2 signaling pathway has been implicated in the pathogenesis of AD, with increased serum levels of soluble ST2 (sST2), a decoy receptor for interleukin (IL)-33, observed in patients with mild cognitive im…		Unrelated	1	Host Defense Peptides	INHIBITS	Cutis Laxa	https://www.ncbi.nlm.nih.gov/pmc/articles/PMC9300821/	Additionally, it is known that once the skin of the neck of such patients is incised, often another free flap is necessary for tension-free cervical wound closure because of the radiogenic dermatofibrosis, altered extracellular matrix remodeling, and changes in vasculature and local host defense peptides, which significantly reduce the natural cervical cutaneous laxity and healing capacity (12, 2…
		Unrelated	2	Lipoproteins	ASSOCIATED_WITH	Coronary artery disease progression	https://pubmed.ncbi.nlm.nih.gov/16020922/	Furthermore, despite a great interest in effects of inflammation and 'early' lipid lowering therapy, no data have been published on the role of plasma C-reactive protein (CRP) and lipoprotein levels in CAD progression after myocardial infarction.
		Unrelated	3	epinephrine	TREATS	AL-RAQAD SYNDROME	https://www.ncbi.nlm.nih.gov/pmc/articles/PMC4255676/	Upon continuous treatment with epinephrine for 45 min, GFP-tagged 2-ARs are translocated from the plasma membrane surface to the cell interior, as indicated by the decreased fluorescence at the cell boundary and the increase in 2-AR-loaded endosomes (Figure 6b).
		Unrelated	4	serum albumin, bovine	STIMULATES	IMMUNODEFICIENCY 13	https://pubmed.ncbi.nlm.nih.gov/16779911/	The application of membrane-impermeant E2 conjugated to bovine serum albumin (E2-BSA) potentiated isoprenaline-evoked ICl,cAMP by approximately the same degree as that for the equivalent level of free E2.
		Related	5	Amyloid beta-Peptides	ASSOCIATED_WITH	Alzheimer Disease, Early Onset	https://pubmed.ncbi.nlm.nih.gov/7998778/	Amyloid beta protein levels in cerebrospinal fluid are elevated in early-onset Alzheimer's disease.
		Unrelated	6	Hyoscyamus niger extract	TREATS	COVID19 (disease)	https://pubmed.ncbi.nlm.nih.gov/33860587/	Therefore, the present study was designed to evaluate the effects of propolis and Hyoscyamus niger L. extract in patients with COVID-19.
		Related	7	SDCBP2	CAUSES	Alzheimer's Disease	https://pubmed.ncbi.nlm.nih.gov/27091974/	Serum levels of soluble ST2 (sST2), a decoy receptor for interleukin (IL)-33, increase in patients with mild cognitive impairment, suggesting that impaired IL-33/ST2 signaling may contribute to the pathogenesis of AD.
		Related	8	Amyloid beta-Peptides	INHIBITS	Alzheimer's Disease	https://pubmed.ncbi.nlm.nih.gov/19723623/	Therefore, the inhibitory effect of PEDF appears to be mediated via the processing of VEGF-R2 by gamma-secretase. gamma-Secretase generates the amyloid-beta (Abeta) peptide of Alzheimer disease from its precursor (amyloid precursor protein).
		Related	9	Amyloid beta-Peptides	CAUSES	ALZHEIMER DISEASE 5	https://www.ncbi.nlm.nih.gov/pmc/articles/PMC6946617/	The deposition of beta-amyloid is an initial step in the pathogenesis of AD.5 However, the exact role of amyloid deposition and neurofibrillary tangle formation in MCI has not been studied extensively.
		Unrelated	10	Flavonoids	INHIBITS	stress related disorder	https://pubmed.ncbi.nlm.nih.gov/19195869/	Cocoa flavonoids have shown a powerful antioxidant activity providing protection against oxidation and helping prevent oxidative stress-related diseases.
		Related	11	Amyloid beta-Peptides	CAUSES	Alzheimer Disease, Early Onset	https://pubmed.ncbi.nlm.nih.gov/10230703/	Genetic studies on some families have shown that mutations in the genes encoding beta-amyloid precursor protein and presenilins 1 and 2 are responsible for early-onset AD.
		Related	12	ST-101	STIMULATES	calmodulin-dependent protein kinase activity	https://pubmed.ncbi.nlm.nih.gov/31474557/	The cognitive enhancer ST101 (spiro[imi-dazo[1,2-a]pyridine-3,2-indan]-2(3H)-one) stimulates CaMKII activity in the hippocampus and medial prefrontal cortex (mPFC).
		Unrelated	13	NADH	ASSOCIATED_WITH	Hepatoma, Morris	https://pubmed.ncbi.nlm.nih.gov/21781/	Quantitative relationship of UDP- glucuronosyltransferase to the NADPH and NADH electron-transport systems in Morris hepatomas with varying growth rates.
Quality score: 3 (some detail mechanisms (2), though it does not mention the effect of ST-101 on the IL-33/ST2 signaling pathway)		Unrelated	14	Basis	TREATS	Drug-Induced Liver Disease	https://www.ncbi.nlm.nih.gov/pmc/articles/PMC4548351/	Finally, the basis of treatment in DILI is discontinuation of the suspected causative agent and supportive measures.
		Unrelated	15	atomoxetine	TREATS	Hyperactivity-impulsivity	https://www.ncbi.nlm.nih.gov/pmc/articles/PMC8698674/	While there was a difference between the two drugs, (MPH is a CNS agent, while ATX is a non CNS agent), both MPH and ATX improve inattention and hyperactivity/impulsivity.
Hypothesis (using supporting sentences and unrelated sentences)		Related	16	Amyloid beta-Peptides	ASSOCIATED_WITH	Alzheimer Disease, Late Onset	https://pubmed.ncbi.nlm.nih.gov/14692704/	The present study was carried out to examine the coincidence of these small vessel pathologies during the development of cognitive deficits, amyloid beta-protein (A beta) deposition, and neurofibrillary tangle (NFT) formation in sporadic late-onset AD.
Based on the available evidence, it can be hypothesized that ST-101, a cognitive enhancer known to stimulate CaMKII activity in the hippocampus and medial prefrontal cortex [12], may have potential therapeutic effects in Alzheimer's disease (AD). The pathogenesis of AD is characterized by the deposition of beta-amyloid, a peptide generated from its precursor, the amyloid precursor protein [8,9,11…		Related	17	SDCBP2	COEXISTS_WITH	ST-101	https://www.ncbi.nlm.nih.gov/pmc/articles/PMC7602032/	Moreover, blaNDM-1 has been identified in E. coli ST90, ST131 and E. cloacae ST231 whereas blaNDM-5 gene in ST101, ST167, and ST405 clones bearing diverse transmitting vectors were responsible for community acquired infections [154,155].
		Related	18	Amyloid beta-Peptides	ASSOCIATED_WITH	Alzheimer Disease 7	https://www.ncbi.nlm.nih.gov/pmc/articles/PMC7989959/	Aggregation and misfolding of amyloid-beta (A ) is a potential mechanism in AD patients.7 A monomers assemble into A O (A oligomers) and fibrils and are then distributed into the circulating blood or cerebrospinal fluid (CSF).1 The A O is neurotoxic and is highly correlated with severe AD.
		Unrelated	19	Washed Microbiota Transplantation	ASSOCIATED_WITH	Ulcerative Colitis	https://www.ncbi.nlm.nih.gov/pmc/articles/PMC7547313/	Patients underwent WMT with the decreased adverse events (AEs) and unchanged clinical efficacy in ulcerative colitis (UC) [20,21] and Crohn's disease (CD) [[21], [22], [23]].
		Related	20	Alzheimer's Disease	PRODUCES	tau Proteins	https://pubmed.ncbi.nlm.nih.gov/24059239/	The two molecular hallmarks of AD are amyloid plaques created from an amyloid precursor protein and hyperphosphorylated tau protein that is deposited as neurofibrillary tangles inside neurons.
		Related	21	IL1RL1	ASSOCIATED_WITH	Alzheimer's Disease	https://www.ncbi.nlm.nih.gov/pmc/articles/PMC7450601/	(2018) [39], a significant increase in interleukin-1 receptor (IL1R) and IL1RL1 was noted in AD vs control cases.
		Unrelated	22	Palmitates	CAUSES	vascular inflammations	https://pubmed.ncbi.nlm.nih.gov/15561952/	This points to a potential contribution of palmitate to vascular inflammation.
		Related	23	CHRM1	ASSOCIATED_WITH	Alzheimer's Disease	https://pubmed.ncbi.nlm.nih.gov/7891119/	In Alzheimer's disease, normal levels of m1 receptors measured by radioligand binding contrasted with decreased m1 receptor immunoreactivity, suggesting that the m1 receptor is altered in Alzheimer's disease.
		Related	24	Amyloid beta-Peptides	ASSOCIATED_WITH	Alzheimer's Disease	https://pubmed.ncbi.nlm.nih.gov/3555492/	The mouse homolog of the human amyloid beta protein (AD-AP) gene is located on the distal end of mouse chromosome 16: further extension of the homology between human chromosome 21 and mouse chromosome 16.
		Unrelated	25	Microbicides	TREATS	Catheter infection	https://pubmed.ncbi.nlm.nih.gov/3668775/	Antimicrobial therapy of Broviac catheter infections in pediatric hematology oncology patients.
		Unrelated	26	IC 261	ASSOCIATED_WITH	tumor growth	https://www.ncbi.nlm.nih.gov/pmc/articles/PMC6134061/	Because IC261 is an inhibitor of both CK1 and CK1 (36), the lack of specificity in selectively targeting CK1 may limit its potential application in the clinic to treat GBM even though IC261 effectively blocks tumor growth in vitro and in vivo (Figs 6 and 7).
		Related	27	Amyloid beta-Peptides	STIMULATES	Alzheimer's Disease	https://pubmed.ncbi.nlm.nih.gov/8761337/	Moreover, beta-amyloid was capable of inducing an AD-like phenotype for K+ channels and Cp20 in otherwise normal fibroblasts, providing additional evidence for the potential involvement of these components in AD and suggesting a possible pathological consequence of soluble beta-amyloid elevation in AD.
		Related	28	Amyloid beta-Peptides	TREATS	Alzheimer's Disease	https://pubmed.ncbi.nlm.nih.gov/17105434/	The biology, structure and physiological properties of beta-amyloid peptide and related proteases (secretases) are discussed, as well as existing therapeutics and future strategies for the treatment of Alzheimer's disease.
		Related	29	Amyloid beta-Peptides	ASSOCIATED_WITH	Alzheimer disease, familial, type 3	https://www.ncbi.nlm.nih.gov/pmc/articles/PMC8476544/	Although the physiological relevance of the fragments generated is not fully understood, one of these, the amyloid-beta peptide (A ) originating from the transmembrane domain of the APP protein, is the main component of brain amyloid plaques in Alzheimer s disease (AD)3,4.
		Unrelated	30	Opsonin	ASSOCIATED_WITH	tumor growth	https://pubmed.ncbi.nlm.nih.gov/1491180/	Plasmatic fibronectin has been studied in tumor patients on the basis of the role that unspecific opsonin may play in tumor growth and spreading.
Quality score: 3 (some detail mechanisms (2), makes some logical inferences)		Related	31	Amyloid beta-Peptides	CAUSES	Alzheimer's Disease	https://pubmed.ncbi.nlm.nih.gov/2907602/	It is thus very tempting to speculate that a defect (or defects) of the amyloid beta protein gene is the cause of Alzheimer's disease.
		Unrelated	32	Basis	ASSOCIATED_WITH	Neurodegenerative Disorders	https://pubmed.ncbi.nlm.nih.gov/17105210/	These studies should provide a useful basis for future biophysical studies of SEPT4, including the structural basis for their involvement in diseases such as cancer and neurodegenerative disorders.
Hypothesis (using relations and unrelated relations)		Unrelated	33	isatuximab	ASSOCIATED_WITH	tumor growth	https://www.ncbi.nlm.nih.gov/pmc/articles/PMC8497289/	In terms of Fc-independent activities, isatuximab induced direct cytotoxicity against MM cells in vitro via caspase-dependent apoptosis and lysosome-mediated non-apoptotic cell killing [23].As well as Fc-mediated effector functions and direct anti-tumour effects, isatuximab has demonstrated immunomodulatory effects in vitro that may contribute indirectly to the control of tumour growth in MM [21,…
Based on the provided evidence, we hypothesize that ST-101 may treat Alzheimer's disease by stimulating calmodulin-dependent protein kinase activity [12], which is known to coexist with Alzheimer's disease [74, 85]. This kinase activity could potentially influence the production or aggregation of Amyloid beta-Peptides and tau proteins, both of which are associated with Alzheimer's disease [5, 16,…		Unrelated	34	Dietary Polyphenol	INHIBITS	stress related disorder	https://www.ncbi.nlm.nih.gov/pmc/articles/PMC5533782/	Dietary polyphenols have been epidemiologically linked to a reduction of oxidative stress-related diseases in populations that consume high amounts of fruits or vegetables1, 4.
		Related	35	Amyloid beta-Peptides	CAUSES	Alzheimer Disease, Late Onset	https://www.ncbi.nlm.nih.gov/pmc/articles/PMC4045094/	In this study, we investigate the influence of interactions between genes previously associated with Alzheimer s Disease (AD) on amyloid-beta (A ) load in an effort to better understand the genetic etiology of A deposition and, by extension, risk for LOAD.
		Related	36	CYP27A1	COEXISTS_WITH	ST-101	https://www.ncbi.nlm.nih.gov/pmc/articles/PMC3942433/	Similarly to what has been observed in other human and canine KP isolates [34], [12], the association of bla CTX-M genes with the the aac(6 )-Ib-cr encoding an aminoglycoside acetyl transferase determining PMQR, was demonstrated in all ST101 and ST340 isolates, but only in one out of four ST15, but these PMQR genes were not located in the same plasmid in our strains.
		Related	37	tau Proteins	INHIBITS	Alzheimer's Disease	https://pubmed.ncbi.nlm.nih.gov/17721707/	Furthermore, total tau protein levels were slightly decreased in both FTLD and AD as compared to control subjects.
		Unrelated	38	Prescribed medications	TREATS	Polycystic Ovary Syndrome	https://www.ncbi.nlm.nih.gov/pmc/articles/PMC3509263/	Measures Demographics, medication use at the time of polysomnography (with a special emphasis on the use of oral contraceptives and metformin: two of the most commonly prescribed medications used to treat PCOS) and history of adenotonsillectomy prior to polysomnography, were collected using our electronic records that contain complete prescribing and surgical information.
		Related	39	Amyloid beta-Peptides	ASSOCIATED_WITH	Familial Alzheimer Disease (FAD)	https://pubmed.ncbi.nlm.nih.gov/1465129/	Mutation of the beta-amyloid precursor protein in familial Alzheimer's disease increases beta-protein production.
		Unrelated	40	GlycA	ASSOCIATED_WITH	Metabolic Diseases	https://www.ncbi.nlm.nih.gov/pmc/articles/PMC5738692/	In addition, GlycA has also a role in metabolic diseases and cardiovascular events and mortality.
		Related	41	SDCBP2	ASSOCIATED_WITH	Alzheimer's Disease	https://www.ncbi.nlm.nih.gov/pmc/articles/PMC5817350/	Therefore, in this review, the critical roles of the IL-33/ST2 pathway in neurological disorders are discussed, particularly in Alzheimer's disease, multiple sclerosis, and experimental cerebral malaria.
		Related	42	Amyloid beta-Peptides	CAUSES	Alzheimer Disease 7	https://www.ncbi.nlm.nih.gov/pmc/articles/PMC2723955/	The techniques were applied to the detection of amyloid-beta derived diffusible ligands (ADDLs) which play an important role in the molecular pathogenesis of Alzheimer s Disease.7
		Unrelated	43	calponin	ASSOCIATED_WITH	fibromyoma of the cervix	https://pubmed.ncbi.nlm.nih.gov/19091325/	Expression of steroid receptors and calponin in a cervical leiomyoma in a young pig.
Quality score: 1 (few detail mechanisms and logical inferences, no references to support statements/hypothesis)		Related	44	Amyloid beta-Peptides	COMPLICATES	Alzheimer's Disease	https://www.ncbi.nlm.nih.gov/pmc/articles/PMC7388140/	Elevated cortisol levels and HPA axis dysfunction are implicated in chronic stress, which releases amyloid beta (A ) that causes and/or worsens AD (109).
		Unrelated	45	E-Box Elements	CAUSES	tumor growth	https://www.ncbi.nlm.nih.gov/pmc/articles/PMC3821558/	They also found that hTERT expression was regulated by DNA methylation and histone H3-K9 modifications that effect the ability of c-myc binding to the E-box 1 site in hTERT promoter.92 Interestingly, DNA methylation and histone methylation/acetylation serve to modulate gene expression and represent a powerful mechanism that contributes to tumor growth by the altered expression of genes involved i…
Hypothesis (using no additional information)		Related	46	tau Proteins	CAUSES	Alzheimer's Disease	https://pubmed.ncbi.nlm.nih.gov/1527090/	It has been suggested that hyperphosphorylation of the tau protein in neurofibrillary tangles may be relevant to the etiology of Alzheimer's disease and that at least one of the hyperphosphorylated sites lies within a consensus sequence for the p34cdc2/cdc28 family of kinases.
Hypothesis: ST-101, a novel therapeutic agent, may exert its potential therapeutic effects on Alzheimer's disease through multiple mechanisms. Primarily, ST-101 may enhance the function of the cholinergic system, which is significantly impaired in Alzheimer's disease, by increasing the release of acetylcholine, a key neurotransmitter involved in memory and learning. This could potentially improve…		Unrelated	47	AV-1451	TREATS	Frontotemporal dementia	https://www.ncbi.nlm.nih.gov/pmc/articles/PMC7572920/	Tau PET tracers such as [18F]AV 1451 and [11C]PBB3 have been less promising in FTD, since off-target binding has led to false-positive tau positivity in subjects who are unlikely to harbor tau neuropathology (Tsai et al., 2019; Wang and Edison, 2019).
		Related	48	tau Proteins	ASSOCIATED_WITH	Alzheimer's Disease	https://pubmed.ncbi.nlm.nih.gov/2424016/	Microtubule-associated protein tau (tau) is a major antigenic component of paired helical filaments in Alzheimer disease.
		Unrelated	49	temozolomide	TREATS	High grade tumor	https://pubmed.ncbi.nlm.nih.gov/12815001/	Temozolomide (TMZ) is a chemotherapeutic agent used in the treatment of high-grade brain tumors.
		Related	50	Amyloid beta-Peptides	CAUSES	Familial Alzheimer Disease (FAD)	https://pubmed.ncbi.nlm.nih.gov/9562460/	The significance of amyloid beta protein, especially those ending at the 42nd residue (Abeta42), in the pathogenesis of familial Alzheimer's disease (FAD) linked to the mutations of presenilins, was examined by transfection studies using cultured cells and immunohistochemical analysis of autopsied brains.
		Unrelated	51	Antidepressive Agents	INHIBITS	psychiatric emergencies	https://www.ncbi.nlm.nih.gov/pmc/articles/PMC8843130/	In contrast, the effectiveness of antidepressants in preventing psychiatric emergencies during pregnancy has not received similar attention.
		Related	52	tau Proteins	STIMULATES	Alzheimer's Disease	https://pubmed.ncbi.nlm.nih.gov/9147408/	Dependence of cerebrospinal fluid Tau protein levels on apolipoprotein E4 allele frequency in patients with Alzheimer's disease.
		Related	53	MRLN	CAUSES	Alzheimer's Disease	https://pubmed.ncbi.nlm.nih.gov/22307680/	Furthermore, we show that preclinical carriers of the PSEN1 M139T mutation may overexpress A 1-42 suggesting that this particular mutation may cause AD by stimulating-secretase-mediated cleavage at amino acid 42 in the Asequence.
		Unrelated	54	Recombinant BCG Vaccine	ASSOCIATED_WITH	Neoplasms	https://www.ncbi.nlm.nih.gov/pmc/articles/PMC9143156/	Histological analyses revealed that rBCG::DisA-treated rats had significantly lower pathologic grades, tumor involvement indexes and highest tumor stages compared to animals treated with pBCG.
		Unrelated	55	4-coumaric acid	TREATS	Albinism	https://pubmed.ncbi.nlm.nih.gov/23178520/	Male albino Wistar rats were pretreated with p-coumaric acid (8 mg/kg body weight) daily for a period of 7 days after which isoproterenol (100mg/kg body weight) was injected subcutaneously into rats twice at an interval of 24h (8th and 9th day).The activity/levels of serum cardiac diagnostic markers, heart lysosomal lipid peroxidation products and the activities of lysosomal enzymes ( -glucuronid…
		Unrelated	56	interleukin-7	ASSOCIATED_WITH	Extranodal Tumor Deposits	https://pubmed.ncbi.nlm.nih.gov/31941828/	We found that intratumoral injection of a tumor-selective oncolytic vaccinia virus encoding interleukin-7 (IL-7) and IL-12 into tumor-bearing immunocompetent mice activated the inflammatory immune status of previously poorly immunogenic tumors and resulted in complete tumor regression, even in distant tumor deposits.
		Unrelated	57	Troponin T, Cardiac Muscle	ASSOCIATED_WITH	cardiac event	https://www.ncbi.nlm.nih.gov/pmc/articles/PMC5866325/	Finally, log cTnT remained independently associated with MACCE and the safety composite outcome in multivariable regression models that included log (logistic EuroSCORE) and need for inotropes or vasopressors within the first 6 hours after CABG (Table S2).The AUCs for the association with MACCE were 0.72 for conventional cTnT (95% CI, 0.67 0.78) and 0.77 for hs cTnT (95% CI, 0.72 0.81).
		Unrelated	58	Cancer Vaccines	STIMULATES	tumor growth	https://pubmed.ncbi.nlm.nih.gov/497110/	Treatment begun one day before tumour-cell inoculation enhances tumour growth.
		Related	59	Amyloid beta-Peptides	ASSOCIATED_WITH	Alzheimer Disease 11	https://www.ncbi.nlm.nih.gov/pmc/articles/PMC4040417/	Impaired mitochondrial protein import due to the amyloid beta peptide (A ) has been observed in Alzheimer s disease (AD)11, suggesting that mutant htt may cause a similar dysfunction in yeast.
Quality score: 2 (does make some logical inferences and mentions some detail mechanisms (4), but no references or evidence to support the statements)		Unrelated	60	Prescribed medications	TREATS	Premature Ejaculation	https://www.ncbi.nlm.nih.gov/pmc/articles/PMC5005309/	The most commonly prescribed drug for lifelong PE was an on-demand selective serotonin reuptake inhibitor (SSRI; 44.2%), whereas 26.3% and 10.1% prescribed daily SSRI and topical treatment, respectively.
		Related	61	Amyloid beta-Peptides	ASSOCIATED_WITH	Alzheimer Disease 12	https://www.ncbi.nlm.nih.gov/pmc/articles/PMC2773287/	It is hypothesized that high concentrations of glutamate cause an excess calcium influx through the ion channel that leads to excitotoxicity.10 It has been shown in AD patients that glutamate transporters in glial cells are reduced, while the presence of beta amyloid indirectly stimulates excessive glutamate production.11 This phenomenon is thought to contribute to the neurotoxicity of beta amylo…
(Highlight in red: incorrect citations)		Unrelated	62	Neuraminidase inhibitors, direct acting antivirals	INHIBITS	Infections, Hospital	https://www.ncbi.nlm.nih.gov/pmc/articles/PMC4080987/	In multivariate logistic regression, early use of neuraminidase inhibitors was found to be protective (Odds ratio: 0.17, confidence interval: 0.03-0.77, p = 0.022), nosocomial infections (OR: 5.7, CI: 1.84-18, p = 0.013), presence of malignant disease (OR: 3.8, CI: 0.66-22.01, p = 0.133) (Table 3).
		Related	63	ST-101	COEXISTS_WITH	CHRM1	https://www.ncbi.nlm.nih.gov/pmc/articles/PMC8001562/	Concerning the sequence types found in this study, ST847 (n = 3), ST6448 (n = 3), ST10 (n = 2), ST101, ST429 and ST40 were detected in blaCTX-M-1,9,27, blaCTX-M-15,55/blaCMY-2, blaCTX-M-15,27, blaCTX-M-1, blaCTX-M-15/blaCMY-2 and blaCTX-M-1-containing strains, respectively (Table 1).
		Unrelated	64	cobaltous cation	ASSOCIATED_WITH	Quadriplegics	https://www.ncbi.nlm.nih.gov/pmc/articles/PMC6148783/	This theory comes from studies showing that despite complete paralysis of the respiratory muscles, subjects show the same AH stimulus-response to CO2 and that increasing the tidal volume using a ventilator can relieve AH in C1-C2 quadriplegics, suggesting a vagal pathway rather than feedback from chest wall afferents [7, 12, 13].
		Related	65	IL1RL1	COEXISTS_WITH	ST-101	https://www.ncbi.nlm.nih.gov/pmc/articles/PMC7602032/	Moreover, blaNDM-1 has been identified in E. coli ST90, ST131 and E. cloacae ST231 whereas blaNDM-5 gene in ST101, ST167, and ST405 clones bearing diverse transmitting vectors were responsible for community acquired infections [154,155].
		Related	66	Amyloid beta-Peptides	ASSOCIATED_WITH	ALZHEIMER DISEASE 18	https://www.ncbi.nlm.nih.gov/pmc/articles/PMC7864928/	Considering the potential functions of the PVS system, studies had proved that the PVS waste drainage system contributed to a larger portion of interstitial solutes clearance, such as amyloid beta (A ), preventing A deposition that was thought to be pathogenic in AD18,22.
		Unrelated	67	liraglutide	TREATS	Non ST segment elevation myocardial infarction	https://www.ncbi.nlm.nih.gov/pmc/articles/PMC6927173/	R. et al. demonstrated that liraglutide can improve left ventricular ejection fraction (LVEF) in patients with non-ST-segment-elevation myocardial infarction [42] and improve myocardial salvage and infarct size after ST-segment-elevation myocardial infarction [43].
		Related	68	Microhemorrhage	CAUSES	Alzheimer's Disease	https://pubmed.ncbi.nlm.nih.gov/31084613/	The majority of AD patients also have Abeta deposition in cerebral vessels known as cerebral amyloid angiopathy (CAA), microhemorrhages, and vascular co-morbidities, suggesting that cerebrovascular dysfunction contributes to AD etiology.
		Related	69	CYP27A1	ASSOCIATED_WITH	Alzheimer's Disease	https://pubmed.ncbi.nlm.nih.gov/35447319/	High cholesterol and 27-hydroxycholesterol contribute to phosphorylation of tau protein by impairing autophagy causing learning and memory impairment in C57BL/6J mice.
		Related	70	Amyloid beta-Peptides	ASSOCIATED_WITH	Alzheimer Disease 9	https://www.ncbi.nlm.nih.gov/pmc/articles/PMC3622466/	Cognition and its decline associated with brain aging also seems to be variable and possibly open to modifications.1 Studies in humans and animal models suggest that age-related cognitive decline is more likely to be associated with alterations in synaptic connectivity than with neuronal loss and white matter changes.6,7 According to recent studies, alterations of intracellular -secretase mediate…
		Unrelated	71	prohibitin	ASSOCIATED_WITH	Inflammatory disorder	https://www.ncbi.nlm.nih.gov/pmc/articles/PMC5834496/	PHBs are also involved in inflammatory diseases, such as inflammatory bowel diseases9.
		Unrelated	72	Neoplasm Metastasis	PRODUCES	HLA class I	https://www.ncbi.nlm.nih.gov/pmc/articles/PMC5509351/	Furthermore, we demonstrated that 50% of the 16 patients with UM have metastases that express both PRAME and HLA class I.
		Unrelated	73	VX-970	INHIBITS	tumor growth	https://www.ncbi.nlm.nih.gov/pmc/articles/PMC6992744/	Treatment with VX-970 also led to significant tumor growth inhibition in ACC PDXs and even to tumor regression in one mouse.
		Related	74	calmodulin-dependent protein kinase activity	COEXISTS_WITH	Alzheimer's Disease	https://www.ncbi.nlm.nih.gov/pmc/articles/PMC3634479/	Enhancement of CaMKII activity may be the primary mechanism by which naringin affects long-term cognitive functions in AD.
		Related	75	CHRM1	CAUSES	Alzheimer's Disease	https://pubmed.ncbi.nlm.nih.gov/22307680/	Furthermore, we show that preclinical carriers of the PSEN1 M139T mutation may overexpress A 1-42 suggesting that this particular mutation may cause AD by stimulating-secretase-mediated cleavage at amino acid 42 in the Asequence.
		Unrelated	76	Gentamicins	TREATS	musculoskeletal infection	https://pubmed.ncbi.nlm.nih.gov/19276757/	Substantial health care dollars could be saved by the use of liquid gentamicin in bone cement to treat musculoskeletal infections.
		Related	77	Microhemorrhage	COEXISTS_WITH	Alzheimer's Disease	https://pubmed.ncbi.nlm.nih.gov/21392891/	CAA and cerebral microhemorrhages in AD have similar spatial distribution of lobar predominance, and their accumulation similarly affect cognitive function.
		Unrelated	78	arginine	TREATS	tumor growth	https://www.ncbi.nlm.nih.gov/pmc/articles/PMC3662114/	Seventy years ago, arginine, a semiessential amino acid, was demonstrated to control tumor growth in mice [3].
		Unrelated	79	aspirin	ASSOCIATED_WITH	GASTROINTESTINAL LOSS	https://pubmed.ncbi.nlm.nih.gov/5307941/	Effect of aspirin upon gastrointestinal blood loss in pernicious anaemia.
		Unrelated	80	Cyclin E	INHIBITS	tumor growth	https://www.ncbi.nlm.nih.gov/pmc/articles/PMC4496193/	In view of this, inhibition of cyclin E following EphB1 knockdown likely plays a role in the observed inhibition of medulloblastoma tumor growth.
		Related	81	MRLN	ASSOCIATED_WITH	Alzheimer's Disease	https://pubmed.ncbi.nlm.nih.gov/7891119/	In Alzheimer's disease, normal levels of m1 receptors measured by radioligand binding contrasted with decreased m1 receptor immunoreactivity, suggesting that the m1 receptor is altered in Alzheimer's disease.
		Related	82	tau Proteins	ASSOCIATED_WITH	Familial Alzheimer Disease (FAD)	https://pubmed.ncbi.nlm.nih.gov/19782073/	In this work, we review the links between beta amyloid peptide, tau protein and GSK3 that occur in familial Alzheimer disease.
		Unrelated	83	borage oil	INHIBITS	Osteoporosis, Age-Related	https://pubmed.ncbi.nlm.nih.gov/31553309/	Fish oil and borage oil (rich in omega3 fatty acids) can partially prevent aged-related bone loss in SAMP8 mice.
		Unrelated	84	ascochlorin	INHIBITS	tumor growth	https://pubmed.ncbi.nlm.nih.gov/25624051/	Finally, when administered intraperitoneally, ASC also inhibited tumor growth in an orthotopic HCC mouse model and reduced STAT3 activation in tumor tissues.
		Related	85	Alzheimer's Disease	ASSOCIATED_WITH	calmodulin-dependent protein kinase activity	https://www.ncbi.nlm.nih.gov/pmc/articles/PMC4995548/	For example, granulocyte-macrophage colony-stimulating factor has been shown to activate CREB in leukocytes via RSK.44 Interestingly, peripheral administration of granulocyte-macrophage colony-stimulating factor to a mouse model of AD has been shown to improve cognitive function.45 Similarly, mice deficient in CaMKIV not only exhibit impairments in memory, but also exhibit impaired CREB phosphory…
		Related	86	ST-101	COEXISTS_WITH	MRLN	https://www.ncbi.nlm.nih.gov/pmc/articles/PMC8001562/	Concerning the sequence types found in this study, ST847 (n = 3), ST6448 (n = 3), ST10 (n = 2), ST101, ST429 and ST40 were detected in blaCTX-M-1,9,27, blaCTX-M-15,55/blaCMY-2, blaCTX-M-15,27, blaCTX-M-1, blaCTX-M-15/blaCMY-2 and blaCTX-M-1-containing strains, respectively (Table 1).
		Unrelated	87	Leukotriene Receptor Antagonist [EPC]	TREATS	Nasal Polyps	https://www.ncbi.nlm.nih.gov/pmc/articles/PMC2796398/	Topical corticosteroids are effective in most AERD patients with rhinosinusitis.54 Several reports have suggested that LTRA could improve rhinosinusitis and nasal polyps without surgery,55,56 suggesting that endoscopic nasal surgery should be selected for severe chronic sinusitis with multiple nasal polyps and nasal passage obstruction.

## Sheet: Baclofen
Hypothesis (using supporting sentences)		(Un)Related	Ref	Subject Entity Name	Relation type	Object Entity Name	URL	Sentence
Based on the provided evidence, we hypothesize that baclofen, a GABA B receptor agonist, may have therapeutic potential in the treatment of Alzheimer's disease (AD) through multiple mechanisms. Firstly, baclofen may modulate the noradrenergic system, which is known to degenerate in AD [59, 25]. Secondly, baclofen may influence lipid metabolism, which is implicated in the pathogenesis of AD [9, 90…		Related	1	Amyloid beta-Peptides	ASSOCIATED_WITH	Alzheimer disease, familial, type 3	https://www.ncbi.nlm.nih.gov/pmc/articles/PMC8476544/	Although the physiological relevance of the fragments generated is not fully understood, one of these, the amyloid-beta peptide (A ) originating from the transmembrane domain of the APP protein, is the main component of brain amyloid plaques in Alzheimer s disease (AD)3,4.
		Related	2	baclofen	STIMULATES	Tyrosine Phosphorylation	https://www.ncbi.nlm.nih.gov/pmc/articles/PMC4537290/	On the other hand, changes in baclofen-stimulated, G-protein-independent tyrosine phosphorylation of FAKTyr397 and GSK3 Tyr216 did not exhibit desensitization.
		Unrelated	3	citrate buffer	TREATS	Influenza	https://www.ncbi.nlm.nih.gov/pmc/articles/PMC1569823/	As an attempt to induce cross-neutralising antibodies against different influenza strains, we generated H7-VLPs or H5-VLPs treated with a citrate buffer at pH5.3 for 10 minutes.
		Related	4	Alzheimer's Disease	ASSOCIATED_WITH	nitric oxide biosynthetic process	https://www.ncbi.nlm.nih.gov/pmc/articles/PMC8620086/	It turned out that genes associated with hypoglycemia, macro- and microvascular diabetes complications and Alzheimer s disease are involved in nitric oxide biosynthesis, glucose homeostasis, ERK1 and ERK2 cascade, smooth muscle cell proliferation, and some others.
		Unrelated	5	Leydig insulin-like protein	ASSOCIATED_WITH	tumor growth	https://pubmed.ncbi.nlm.nih.gov/14520686/	The members of the relaxin-like hormone family, relaxin and INSL3, also known as relaxin-like factor (RLF) or Leydig cell-derived insulin-like factor (LEY-I-L), are implicated in various mechanisms associated with tumor cell growth, differentiation, invasion and neovascularization.
		Related	6	Alzheimer's Disease	ASSOCIATED_WITH	Protein-Protein Interaction	https://pubmed.ncbi.nlm.nih.gov/8380879/	This compound, currently in clinical trials as a potential therapeutic agent for Alzheimer's disease, caused a highly significant increase in cytoskeletal protein-protein interactions.
		Related	7	Alzheimer's Disease	PRODUCES	tau Proteins	https://pubmed.ncbi.nlm.nih.gov/24059239/	The two molecular hallmarks of AD are amyloid plaques created from an amyloid precursor protein and hyperphosphorylated tau protein that is deposited as neurofibrillary tangles inside neurons.
		Related	8	Chemosensitization	ASSOCIATED_WITH	baclofen	https://pubmed.ncbi.nlm.nih.gov/2409562/	Clonidine pretreatment did not significantly alter the effect of baclofen alone, but reversed the potentiation of the action of baclofen produced by both theophylline and isobutylmethylxanthine.
		Related	9	Alzheimer's Disease	ASSOCIATED_WITH	Lipid Metabolism	https://pubmed.ncbi.nlm.nih.gov/1946550/	Since we have shown elevated tin levels in patients with Alzheimer's disease, and since organic tin compounds given to animals produce a syndrome with similarities to Alzheimer's disease, there is a need for investigation of the role of tin in lipid metabolism in dementia.
		Unrelated	10	arsenal	STIMULATES	Malignant Neoplasms	https://www.ncbi.nlm.nih.gov/pmc/articles/PMC3724174/	In conclusion, there is an increasing arsenal of approaches that can be used to enhance the efficacy of more classical cancer therapeutics and overcome treatment resistance.
		Related	11	Alzheimer's Disease	ASSOCIATED_WITH	Macromolecular alteration	https://pubmed.ncbi.nlm.nih.gov/17917109/	Professional and amateur chaperones not only colocalize with the pathological lesions of AD, but may also be involved in conformational changes of Abeta, and in the clearance of Abeta from the brain via phagocytosis or active transport across the blood-brain barrier.
		Related	12	glucose metabolism	COEXISTS_WITH	Alzheimer disease, familial, type 3	https://www.ncbi.nlm.nih.gov/pmc/articles/PMC8865308/	In ADAD, one study suggests that glucose metabolism declines about 5 to 8 years before symptom onset and in another 14 years before expected onset.83,84 In DS-AD as in sporadic AD, glucose hypometabolism and AD-related gray matter volume reductions occur only in older subjects with higher A burden.85 Interestingly, early work using FDG-PET in nondemented adults with DS suggests hypermetabolism in…
		Unrelated	13	poplar antigen	ASSOCIATED_WITH	Water Stress	https://pubmed.ncbi.nlm.nih.gov/21444373/	Poplars are one of the woody plants that are very sensitive to water stress, which may reduce the productivity of fast-growing plantations.
		Related	14	immunoreactivity	COEXISTS_WITH	Alzheimer Disease 14	https://www.ncbi.nlm.nih.gov/pmc/articles/PMC5357964/	Of interest, CL-P1 immunoreactivity is also increased on reactive astrocytes in AD14.
Quality score: 3 (provides many detail mechanisms, however, some sentences cited included references that did not mention anything the sentences were saying or included mechanisms of another drug listed in the reference)		Related	15	tau Proteins	ASSOCIATED_WITH	Familial Alzheimer Disease (FAD)	https://pubmed.ncbi.nlm.nih.gov/19782073/	In this work, we review the links between beta amyloid peptide, tau protein and GSK3 that occur in familial Alzheimer disease.
		Unrelated	16	Hemoglobin	ASSOCIATED_WITH	Cancer anemia	https://pubmed.ncbi.nlm.nih.gov/10713657/	Although there was no correlation between hemoglobin and erythropoietin response in cancer anemia (r=-0.07), serum levels of erythropoietin were found to be higher in anemic cancer patients (mean, 40.1+/-34.7 u/ml), compared with cancer patients with normal hemoglobin values (mean, 19.96+/-18.4 u/ml).
Hypothesis (using supporting sentences and unrelated sentences)		Related	17	Alzheimer's Disease	ASSOCIATED_WITH	calpain activity	https://pubmed.ncbi.nlm.nih.gov/29710724/	These effects in HHcy rats were accompanied by a decrease in calpain activity under MO treatment, supporting that calpain activation might be involved in AD pathogenesis in HHcy rats.
Baclofen, a GABA B receptor agonist, may have potential therapeutic effects in treating Alzheimer's disease (AD) through several mechanisms. Firstly, it may modulate the amyloid-beta peptide (Aβ) pathway, which is implicated in the formation of brain amyloid plaques, a hallmark of AD [1,7,15,32,49,55,58]. Baclofen's potential to act downstream of metabotropic glutamate receptor (mGluR) signaling …		Unrelated	18	New medications	TREATS	Orphan Diseases	https://pubmed.ncbi.nlm.nih.gov/21248312/	The Act enhances existing incentive programs through specific financial benefits to companies who seek a pediatric indication for a new drug to treat an orphan disease that occurs specifically in children.
		Unrelated	19	Leukocyte L1 Antigen Complex	INHIBITS	tumor growth	https://www.ncbi.nlm.nih.gov/pmc/articles/PMC8944005/	For example, calprotectin has been shown to reduce tumor cell growth by inducing apoptosis of the cancerous cells [26].
		Related	20	G protein-coupled glutamate receptor signaling pathway	ASSOCIATED_WITH	baclofen	https://www.ncbi.nlm.nih.gov/pmc/articles/PMC5846455/	Since baclofen may act downstream of metabotropic glutamate receptor (mGluR) signaling,55 we sought to determine whether the effect of baclofen is dependent on mGluR activation.
		Related	21	baclofen	STIMULATES	Phosphorylation	https://www.ncbi.nlm.nih.gov/pmc/articles/PMC3386256/	In these assays, all transfected GB1asa trafficked to the cell surface ( Fig 1C ) and baclofen-induced ERK1/2 phosphorylation was higher in cells co-expressing both GB1 and GB2 than that of cells overexpressing GB1asa ( Fig 1D ), suggesting that though GB1asa may form a functional receptor at the cell surface in the absence of GB2, its efficacy was less than heterodimeric GABAB receptor.10.1371/j…
		Unrelated	22	Benzodiazepines	CAUSES	Alcoholic relapse	https://pubmed.ncbi.nlm.nih.gov/15882114/	Benzodiazepines are themselves addictive and they may increase the risk of alcohol relapse.
		Unrelated	23	M Protein, multiple myeloma	ASSOCIATED_WITH	PREMATURE CHROMATID SEPARATION TRAIT	https://www.ncbi.nlm.nih.gov/pmc/articles/PMC7083056/	Scale bar = 100 m. g Protein levels of the indicated markers in hSMGepiS/PCs and hSMGMCs by western blottingLong-term culture of hSMGepiS/PCshSMGepiS/PCs were long passaged in vitro, during which they assumed the shape of a small cobblestone (Fig. 2a).
		Related	24	tau Proteins	STIMULATES	Alzheimer's Disease	https://pubmed.ncbi.nlm.nih.gov/9147408/	Dependence of cerebrospinal fluid Tau protein levels on apolipoprotein E4 allele frequency in patients with Alzheimer's disease.
		Related	25	baclofen	STIMULATES	noradrenergic	https://www.ncbi.nlm.nih.gov/pmc/articles/PMC3171994/	The second such study evaluated baclofen, a GABA B receptor agonist and antispasmodic medication that reduces mood symptoms in heroin withdrawal [48], and mirtazapine, an antidepressant that enhances noradrenergic and serotonergic transmission and decreases withdrawal symptoms in alcohol-dependent patients [49], especially agitation and insomnia [50].
		Unrelated	26	therapeutic enzyme	CAUSES	anaphylaxis	https://www.ncbi.nlm.nih.gov/pmc/articles/PMC8190373/	Although this treatment reduces plasma uric acid level, however, this therapeutic enzyme is costly, immunogenic and cause allergic reactions and anaphylaxis.
		Related	27	Familial Alzheimer Disease (FAD)	INHIBITS	Signal Transduction Pathways	https://pubmed.ncbi.nlm.nih.gov/11146108/	We have previously reported that familial Alzheimer's disease linked presenilin-1 variants downregulate the signaling pathway of the UPR by affecting the phosphorylation of Ire1 alpha.
		Unrelated	28	Herbal Drugs	TREATS	Liver carcinoma	https://pubmed.ncbi.nlm.nih.gov/24286077/	Therefore, patients with chronic liver diseases such as viral hepatitis, liver cirrhosis, and hepatocellular carcinoma need immediate attention to sustain life and as a result are often exposed to the prolonged treatment with drugs/herbal medications.
		Unrelated	29	arsenal	TREATS	Adrenocortical carcinoma	https://www.ncbi.nlm.nih.gov/pmc/articles/PMC3360195/	Sundin 8 reviews the imaging agent arsenal used in the management of adrenocortical cancer with the focus on 11C-metomidate that binds with high specificity and affinity to 11- -hydroxylase providing the only means for the differentiation of benign and malignant adrenocortical tumors from those of non-adrenocortical origin.
		Unrelated	30	lutein / zeaxanthin	INHIBITS	Malignant neoplasm of breast	https://pubmed.ncbi.nlm.nih.gov/6528436/	Results of this study suggest that the carotenoids beta-cryptoxanthin, lycopene, and lutein/zeaxanthin may protect against breast cancer.
		Unrelated	31	antibody conjugate	INHIBITS	tumor growth	https://pubmed.ncbi.nlm.nih.gov/1138199/	Suppression of tumour growth in mice by a drug-antibody conjugate using a novel approach to linkage.
		Related	32	Amyloid beta-Peptides	ASSOCIATED_WITH	Alzheimer Disease 7	https://www.ncbi.nlm.nih.gov/pmc/articles/PMC7989959/	Aggregation and misfolding of amyloid-beta (A ) is a potential mechanism in AD patients.7 A monomers assemble into A O (A oligomers) and fibrils and are then distributed into the circulating blood or cerebrospinal fluid (CSF).1 The A O is neurotoxic and is highly correlated with severe AD.
Quality score: 4 (provides detail mechanisms and logical inferences)		Unrelated	33	glycated apolipoprotein B	ASSOCIATED_WITH	Diabetes Mellitus, Non-Insulin-Dependent	https://pubmed.ncbi.nlm.nih.gov/21734572/	Glycated apolipoprotein B is significantly lower in statin-treated type 2 diabetes compared with those not on statins.
		Related	34	baclofen	INHIBITS	dopamine metabolism	https://pubmed.ncbi.nlm.nih.gov/8848116/	The motor response elicited by microinjected baclofen was associated with a reduction in dopamine metabolism in the prefrontal cortex and an increase in metabolism in the core of the nucleus accumbens, but not in the accumbal shell or the dorsolateral striatum.
Hypothesis (using relations and unrelated relations)		Related	35	Macromolecular alteration	COEXISTS_WITH	Alzheimer's Disease	https://pubmed.ncbi.nlm.nih.gov/2357156/	Since the RH sites are thought to represent a conformational change of the receptors, induced by the interaction of agonist-bound receptor with a signal transduction protein located in the cell membrane, the reduced ratio of RH sites to total receptors suggests a functional alteration of cortical cell membranes in Alzheimer's disease.
Baclofen may exert therapeutic effects in Alzheimer's disease through multiple mechanisms. Firstly, baclofen stimulates tyrosine phosphorylation and lipid metabolism [2, 40], processes that are associated with Alzheimer's disease [4, 9]. This suggests that baclofen may modulate these pathways to counteract the pathological changes seen in Alzheimer's disease. Secondly, baclofen is associated with…		Related	36	Alzheimer's Disease	ASSOCIATED_WITH	adenylate cyclase activity	https://www.ncbi.nlm.nih.gov/pmc/articles/PMC3365269/	Ca2+-stimulated ACs have been implicated in the pathology of several psychiatric diseases associated with cognitive decline, such as, Alzheimer's disease, which shows a marked decrease in Ca2+-stimulated AC activity,41, 42 and bipolar disorder,43, 44 where genetic linkage of AC8 has been associated with the disease.
		Unrelated	37	Century (brand of multivitamin)	ASSOCIATED_WITH	Congenital Hypothyroidism	https://www.ncbi.nlm.nih.gov/pmc/articles/PMC5183164/	In Gilgit, it has prevailed for centuries, and in districts where goitre is more prevalant among the adult population, cretinism is more common and of a graver type.
		Unrelated	38	streptozocin	CAUSES	Hepatic impairment	https://www.ncbi.nlm.nih.gov/pmc/articles/PMC7759645/	In conclusion, SCU promoted the clearance of Hcy and improved HFHS and STZ-induced hepatic impairment.
		Related	39	Nitric Oxide Pathway	COEXISTS_WITH	Alzheimer disease, familial, type 3	https://www.ncbi.nlm.nih.gov/pmc/articles/PMC6760237/	Untargeted metabolomics studies have indicated that L-arginine/nitric oxide (NO) pathway is among those altered in Alzheimer disease (AD)3, a neurodegenerative disorder accounting for up to 80% of dementia cases4.
		Related	40	baclofen	STIMULATES	Lipid Metabolism	https://pubmed.ncbi.nlm.nih.gov/2868109/	Baclofen is a potent activator of brown fat metabolism.
		Unrelated	41	Neurotransmitters	ASSOCIATED_WITH	Postmenopausal syndrome	https://www.ncbi.nlm.nih.gov/pmc/articles/PMC8953734/	Many clinical, preclinical, in silico and in vitro studies confirm that the aqueous or ethanolic CR extract does not contain an estrogenic compound, rather it has neurotransmitter-like activities which positively influence postmenopausal syndrome.
		Unrelated	42	protopanaxadiol	INHIBITS	colon growth	https://www.ncbi.nlm.nih.gov/pmc/articles/PMC4344561/	Effects of PPD and 5-FU on Colon Tumor Growth Inhibition using Xenogen Bioluminescence ImagingFigure 5A shows the representative Xenogen imaging results from animals in different treatment groups.
		Related	43	tau Proteins	ASSOCIATED_WITH	Alzheimer's Disease	https://pubmed.ncbi.nlm.nih.gov/2424016/	Microtubule-associated protein tau (tau) is a major antigenic component of paired helical filaments in Alzheimer disease.
		Unrelated	44	Sus scrofa pancreas preparation	INHIBITS	Fibrosis, Liver	https://pubmed.ncbi.nlm.nih.gov/1234099/	In the previous experiments, it was demonstrated that high purity elastase extracted from porcine pancreas remarkably inhibits liver fibrosis of rats having chronic liver injury caused by carbon tetrachloride.
		Unrelated	45	PEGINTERFERON	ASSOCIATED_WITH	Hepatitis B	https://www.ncbi.nlm.nih.gov/pmc/articles/PMC3714234/	However, data on this issue are extremely rare in terms of explaining the different influences of IL28B polymorphism on treatment outcomes using PEG-IFN and spontaneous clearance in HBV infection [7], [12].
		Related	46	baclofen	ASSOCIATED_WITH	immunoreactivity	https://pubmed.ncbi.nlm.nih.gov/11166695/	Baclofen also significantly decreases dorsal horn CGRP immunoreactivity relative to the increased levels seen after inflammation of the colon.
		Unrelated	47	Amino Acids	CAUSES	PREMATURE CHROMATID SEPARATION TRAIT	https://www.ncbi.nlm.nih.gov/pmc/articles/PMC3651533/	After Yeo Johnson transformation (car) of the amino acid concentrations, we generated PCs (princomp and factoMineR), from which the first six PCs had eigenvalues >1.0 and cumulatively covered 78.7 % of the variance.
		Related	48	Phosphorylation	COEXISTS_WITH	Alzheimer Disease 13	https://www.ncbi.nlm.nih.gov/pmc/articles/PMC8935215/	For example, miR-326 has been shown to decrease tau phosphorylation and neuronal apoptosis in AD 13.
		Related	49	Amyloid beta-Peptides	CAUSES	Familial Alzheimer Disease (FAD)	https://pubmed.ncbi.nlm.nih.gov/9562460/	The significance of amyloid beta protein, especially those ending at the 42nd residue (Abeta42), in the pathogenesis of familial Alzheimer's disease (FAD) linked to the mutations of presenilins, was examined by transfection studies using cultured cells and immunohistochemical analysis of autopsied brains.
Quality score: 3 (provides detail mechanisms and logical inferences, but no references listed to strengthen statements)		Unrelated	50	Fibroblast Growth Factor 2	ASSOCIATED_WITH	cardiac event	https://www.ncbi.nlm.nih.gov/pmc/articles/PMC8169986/	FGFs 2, 4, 7, 8, 9, 10, 15/19 also appear to be involved in these cardiac morphologic events (Table 1).
		Related	51	nitric oxide biosynthetic process	COEXISTS_WITH	Alzheimer's Disease	https://www.ncbi.nlm.nih.gov/pmc/articles/PMC5328683/	Another factor that may contribute to reduced regional cerebral blood flow is the observed decrease of endothelial nitric oxide (NO) synthesis in AD [231].
Hypothesis (using no additional information)		Related	52	Alzheimer's Disease	ASSOCIATED_WITH	noradrenergic	https://pubmed.ncbi.nlm.nih.gov/6228924/	Changes in cerebral catecholaminergic pathways in Alzheimer type dementia would appear to involve both the noradrenergic and the dopaminergic system in their sub-cortical and cortical distribution, but the essential information currently available involves the noradrenergic innervation of the cerebral cortex.
Baclofen, a GABA-B receptor agonist, has been primarily used as a muscle relaxant and antispasmodic agent. However, its potential therapeutic role in Alzheimer's disease (AD) could be hypothesized based on its neuroprotective and anti-inflammatory properties. The pathogenesis of AD is characterized by the accumulation of beta-amyloid plaques and neurofibrillary tangles, leading to neuroinflammati…		Related	53	Amyloid beta-Peptides	ASSOCIATED_WITH	Alzheimer Disease 11	https://www.ncbi.nlm.nih.gov/pmc/articles/PMC4040417/	Impaired mitochondrial protein import due to the amyloid beta peptide (A ) has been observed in Alzheimer s disease (AD)11, suggesting that mutant htt may cause a similar dysfunction in yeast.
		Unrelated	54	fortune	TREATS	Seizures, Focal	https://pubmed.ncbi.nlm.nih.gov/14661999/	It is fortunate that many of the new AEDs have also proven effective in the treatment of generalised seizures, although they were originally developed for the treatment of focal seizures.
		Related	55	Alzheimer Disease, Early Onset	ASSOCIATED_WITH	Lipid Metabolism	https://pubmed.ncbi.nlm.nih.gov/30820047/	Pathway analysis implicates immunity, lipid metabolism, tau binding proteins, and amyloid precursor protein (APP) metabolism, showing that genetic variants affecting APP and Aprocessing are associated not only with early-onset autosomal dominant Alzheimer's disease but also with LOAD.
		Unrelated	56	CHEMOTHERAPY CYCLOPHOSPHAMIDE	TREATS	Locally Advanced Malignant Neoplasm	https://pubmed.ncbi.nlm.nih.gov/12781879/	METHODS: A consecutive series of 173 women, with data available for 166 of these, presenting with large and locally advanced breast cancer (T2>/=4 cm, T3, T4, or N2) were treated with primary chemotherapy comprising cyclophosphamide, vincristine, doxorubicin, and prednisolone and then surgery (either conservation or mastectomy with axillary surgery) followed by radiotherapy were examined.
		Unrelated	57	Gold preparations	TREATS	Cerebrovascular Disorders	https://pubmed.ncbi.nlm.nih.gov/12076306/	Significant restoration of altered values to near normal levels by Ayurvedic Swarna Bhasma and Unani Kushta Tila Kalan (25 mg/kg, orally for 10 days), suggest potentials for gold preparations in cerebrovascular diseases.
		Related	58	Amyloid beta-Peptides	CAUSES	Alzheimer Disease 7	https://www.ncbi.nlm.nih.gov/pmc/articles/PMC2723955/	The techniques were applied to the detection of amyloid-beta derived diffusible ligands (ADDLs) which play an important role in the molecular pathogenesis of Alzheimer s Disease.7
		Related	59	noradrenergic	COEXISTS_WITH	Alzheimer's Disease	https://pubmed.ncbi.nlm.nih.gov/6155966/	These findings provide evidence of a primary degeneration of the noradrenergic system in Alzheimer type dementia.
		Unrelated	60	ergocalciferol	TREATS	hip mass	https://www.ncbi.nlm.nih.gov/pmc/articles/PMC5941617/	Interestingly, a recent study showed that the beneficial effect of vitamin D on hip bone mass in Lebanese adolescent girls persisted 1 year after discontinuation of supplementation [226].
		Related	61	Signal Transduction Pathways	COEXISTS_WITH	Alzheimer's Disease	https://pubmed.ncbi.nlm.nih.gov/12900169/	This review discusses available biological data that highlight the therapeutic potential of the insulin-IGF-1 signaling pathway in AD.
		Unrelated	62	Interleukin-1	ASSOCIATED_WITH	extranodal lymphoma	https://pubmed.ncbi.nlm.nih.gov/30107911/	IL-13 and IL-13R 1 are overexpressed in extranodal natural killer/T cell lymphoma and mediate tumor cell proliferation.
		Related	63	Alzheimer's Disease	INHIBITS	Signal Transduction Pathways	https://pubmed.ncbi.nlm.nih.gov/31266549/	The above effects of IGF-2 on AD were blocked when the PI3K signaling pathway inhibitor wortmannin was added.
Quality score: 2 (although it made some logical inferences, there are no references or anything to strengthen the statements. Also does not give much detail mechanisms)		Unrelated	64	nesiritide	ASSOCIATED_WITH	atrial fibrillation new onset	https://pubmed.ncbi.nlm.nih.gov/35513991/	CONCLUSION: Atrial cardiomyopathy markers including PTFV1, LAD, and BNP were strongly associated with NOAF after AMI.
		Unrelated	65	Anti-Inflammatory Agents	INHIBITS	aggressive cancer	https://www.ncbi.nlm.nih.gov/pmc/articles/PMC8975871/	Furthermore, regular use of aspirin, an anti-inflammatory drug, may reduce the risk of aggressive prostate cancer, disease recurrence and lethal disease in AA men14,15.
(Highlight in red: incorrect citations)		Unrelated	66	INVESTIGATIONAL AGENTS	TREATS	Heart failure with reduced ejection fraction	https://www.ncbi.nlm.nih.gov/pmc/articles/PMC8311356/	As a result, there are multiple other investigational agents and therapeutic clinical trials that are presently in various stages of development that may further complicate the management of HFrEF in the future.
		Related	67	adenylate cyclase activity	COEXISTS_WITH	Alzheimer's Disease	https://pubmed.ncbi.nlm.nih.gov/2054615/	Reduced basal and stimulated (isoprenaline, Gpp(NH)p, forskolin) adenylate cyclase activity in Alzheimer's disease correlated with histopathological changes.
		Unrelated	68	asimadoline	TREATS	Diarrhoea predominant irritable bowel syndrome	https://pubmed.ncbi.nlm.nih.gov/22346361/	Asimadoline and its potential for the treatment of diarrhea-predominant irritable bowel syndrome: a review.
		Related	69	Amyloid beta-Peptides	ASSOCIATED_WITH	Alzheimer Disease 9	https://www.ncbi.nlm.nih.gov/pmc/articles/PMC3622466/	Cognition and its decline associated with brain aging also seems to be variable and possibly open to modifications.1 Studies in humans and animal models suggest that age-related cognitive decline is more likely to be associated with alterations in synaptic connectivity than with neuronal loss and white matter changes.6,7 According to recent studies, alterations of intracellular -secretase mediate…
		Related	70	Alzheimer Disease, Early Onset	ASSOCIATED_WITH	Biochemical Pathway	https://www.ncbi.nlm.nih.gov/pmc/articles/PMC7789697/	The present study aimed to evaluate the gut and neuro-molecular pathways involved in EOAD pathophysiology following environmental stress.
		Related	71	baclofen	STIMULATES	receptor activity	https://www.ncbi.nlm.nih.gov/pmc/articles/PMC7725281/	Application of the agonist baclofen raised receptor activity further to the highest wild-type level (Fig. 2c).
		Unrelated	72	New medications	INHIBITS	Autoimmune Diseases	https://www.ncbi.nlm.nih.gov/pmc/articles/PMC4105696/	These data provide a solid basis for exploring human trichuriasis, developing new anti-parasitic drugs and elucidating how helminths suppress autoimmune disorders.
		Unrelated	73	New medications	TREATS	Zygomycosis	https://pubmed.ncbi.nlm.nih.gov/16984870/	Advances in the understanding of Zygomycetes pathobiology and the introduction of new drugs with improved activity and tolerability for treatment of zygomycosis have improved the prospects of effectively controlling this devastating infection.
		Related	74	Alzheimer Disease, Early Onset	ASSOCIATED_WITH	glucose metabolism	https://www.ncbi.nlm.nih.gov/pmc/articles/PMC7993730/	In presenile-onset AD, the reduction in glucose metabolism is often centered in the parietotemporal association cortex, which is consistent with our study sample, whereas in senile-onset AD, glucose metabolism tends to be reduced in the limbic system and in the frontal lobe, which would be in line with studies reporting reduced hippocampal metabolism [30, 31].
		Related	75	G protein-coupled glutamate receptor signaling pathway	COEXISTS_WITH	Alzheimer's Disease	https://pubmed.ncbi.nlm.nih.gov/15949941/	Impaired metabotropic glutamate receptor/phospholipase C signaling pathway in the cerebral cortex in Alzheimer's disease and dementia with Lewy bodies correlates with stage of Alzheimer's-disease-related changes.
		Related	76	glucose metabolism	COEXISTS_WITH	Alzheimer Disease, Early Onset	https://www.ncbi.nlm.nih.gov/pmc/articles/PMC9140211/	However, a previous positron emission tomography study also used the liberal threshold of uncorrected p < 0.01 for the voxel-wise multiple regression analysis to examine correlations between cerebral glucose metabolism and NPS domain scores in early-onset AD [12].
		Unrelated	77	PEGINTERFERON	TREATS	Hepatitis D Infection	https://www.ncbi.nlm.nih.gov/pmc/articles/PMC5909481/	A systemic review of 151 cases in 44 papers studying cutaneous lesions in hepatitis B immunization, infection, or therapy only found 1 patient with chronic hepatitis B who had a lichenoid lesion.4 LP has been reported to develop or worsen with interferon therapy, largely in the context of hepatitis C.4, 5, 6 A prospective study found that of 67 patients with hepatitis B and 45 patients with hepat…
		Related	78	ALZHEIMER DISEASE 8	ASSOCIATED_WITH	Signal Transduction Pathways	https://www.ncbi.nlm.nih.gov/pmc/articles/PMC7072873/	We have also reviewed the current literature on the role of PPP2A PPP2R5D in different signaling pathways that are relevant in autism spectrum disorder, Alzheimer s disease 8, and Parkinson s disease.
		Unrelated	79	Antirheumatic Drugs, Disease-Modifying	TREATS	shoulder pain chronic	https://pubmed.ncbi.nlm.nih.gov/34115659/	Subdeltoid Rice Bodies in a Patient with Rheumatoid Arthritis on Disease Modifying Antirheumatic Drug Therapy: A Case Report.
		Unrelated	80	lidamycin	TREATS	Multiple Myeloma	https://pubmed.ncbi.nlm.nih.gov/23698252/	Overall, our results indicate that the combined regimen of bortezomib and LDM might be a potential therapeutic remedy for the treatment of MM.
		Unrelated	81	Basis	TREATS	Physical addiction	https://pubmed.ncbi.nlm.nih.gov/15857998/	Structural basis for the physiological temperature dependence of the association of VP16 with the cytoplasmic tail of herpes simplex virus glycoprotein H.
		Unrelated	82	guadecitabine	ASSOCIATED_WITH	tumor growth	https://www.ncbi.nlm.nih.gov/pmc/articles/PMC7045411/	Together, these data suggest that the effect of guadecitabine on tumor growth in vivo is T cell-dependent.
		Unrelated	83	royal jelly	TREATS	Postmenopausal syndrome	https://www.ncbi.nlm.nih.gov/pmc/articles/PMC1513150/	Although RJ has been traditionally known to improve post-menopausal symptoms, to our knowledge, no one has studied whether or not it prevents the decrease of bone mass, which is one of the deleterious symptoms for post-menopausal women.
		Related	84	acetyltransferase activity	COEXISTS_WITH	Alzheimer's Disease	https://pubmed.ncbi.nlm.nih.gov/7417838/	Reduced cortical choline acetyltransferase activity in senile dementia of Alzheimer type is not accompanied by changes in vasoactive intestinal polypeptide.
		Unrelated	85	erythromycin	CAUSES	dumping	https://www.ncbi.nlm.nih.gov/pmc/articles/PMC2978393/	Currently, erythromycin (ERY) is the most widely accepted and potent treatment for GP.17,18 ERY is a macrolide antibiotic that accelerates gastric emptying to promote the dumping of food and undigested material from the stomach into the duodenum.
		Related	86	baclofen	STIMULATES	immunoreactivity	https://pubmed.ncbi.nlm.nih.gov/15236866/	Altered GABAB receptor immunoreactivity in the gerbil hippocampus induced by baclofen and phaclofen, not seizure activity.
		Related	87	baclofen	INHIBITS	cAMP biosynthetic process	https://pubmed.ncbi.nlm.nih.gov/8233093/	GABAB receptor-mediated inhibition of forskolin-stimulated cyclic AMP accumulation in rat spinal cord.
		Unrelated	88	Lipofectamine	ASSOCIATED_WITH	tumor growth	https://pubmed.ncbi.nlm.nih.gov/19565907/	B16 melanoma-bearing mice injected with pCI-SAP complexed with lipofectamine or N-(2,3-dioleoyloxy-1-propyl) trimethylammonium methyl sulfate (DOTAP) show a noteworthy attenuation in tumor growth, and this effect is significantly augmented by repeated administrations of the DNA complexes.
		Unrelated	89	vindesine	INHIBITS	tumor growth	https://pubmed.ncbi.nlm.nih.gov/6796266/	Combined treatment of BALB/c mice bearing s.c. solid EMT6 tumors with DFMO and adriamycin or vindesine also resulted in enhanced inhibition of tumor growth compared to single-drug therapy.
		Related	90	Alzheimer Disease, Late Onset	ASSOCIATED_WITH	Lipid Metabolism	https://pubmed.ncbi.nlm.nih.gov/23626940/	Lipid metabolism is involved in the pathogenesis of late-onset Alzheimer's disease (LOAD).
		Unrelated	91	chaulmoogra	TREATS	Leprosy	https://pubmed.ncbi.nlm.nih.gov/9509742/	In the late 19th century, the main treatment for leprosy was chaulmoogra, extracted from Hydnocarpus seeds.
		Unrelated	92	Adapt (substance)	CAUSES	Illusions	https://www.ncbi.nlm.nih.gov/pmc/articles/PMC8311234/	These results appear consistent with those collected in real environments, whereby adults with ASD showed a reduced contribution of vision in adapting to an induced postural illusion (Morris et al., 2015).
		Related	93	immunoreactivity	COEXISTS_WITH	Alzheimer's Disease	https://pubmed.ncbi.nlm.nih.gov/2868073/	Somatostatin immunoreactivity in cortical and some subcortical regions in Alzheimer's disease.
		Unrelated	94	Proton Pump Inhibitors	ASSOCIATED_WITH	cardiac event	https://www.ncbi.nlm.nih.gov/pmc/articles/PMC6302736/	Myocardial Infarction Proton pump inhibitors have been implicated in acute cardiac events and myocardial infarction (MI) through two proposed mechanisms.
		Unrelated	95	2019-nCoV Vaccine mRNA-1273	ASSOCIATED_WITH	AL-RAQAD SYNDROME	https://www.ncbi.nlm.nih.gov/pmc/articles/PMC9243773/	The main aim of the VigilVacCovid-HCP Project was to capture a complete short-term safety profile of the incidence of ARs, comparing two mRNA vaccines, BNT162b2 and mRNA-1273, in terms of the incidence and severity of ARs.
		Unrelated	96	fosbretabulin	INHIBITS	tumor vasculature	https://www.ncbi.nlm.nih.gov/pmc/articles/PMC5756341/	VDAs, including CA4P, disrupt the existing tumor vasculature within the interior of tumors, a region that is often resistant to standard therapies, such as chemotherapy and radiation, and may have particular benefit in patients with bulky disease.
		Unrelated	97	tumor proteins	ASSOCIATED_WITH	Lymphoma	https://pubmed.ncbi.nlm.nih.gov/6984062/	P80: a tumor-related protein found in many lymphomas of mice.
		Related	98	Biochemical Pathway	ASSOCIATED_WITH	baclofen	https://www.ncbi.nlm.nih.gov/pmc/articles/PMC9360600/	Therefore, the molecules and/or pathways involved in the protective effect of baclofen or muscimol from excitotoxic damage caused by AMPA have not yet been determined.
		Unrelated	99	Extracellular Polymeric Substances	ASSOCIATED_WITH	Chronic Infection	https://www.ncbi.nlm.nih.gov/pmc/articles/PMC6736180/	Bacterial infections are a major human health problem given not only the increasing incidence of drug-resistant bacteria and the decreased search for new antibiotics,1,2 but also due to the ability of bacteria to form biofilms.3,4 Bacterial biofilms are surface-associated bacterial communities embedded in a matrix of extracellular polymeric substances (EPSs) that are implicated in the majority of…
		Related	100	Alzheimer Disease, Late Onset	ASSOCIATED_WITH	Signal Transduction Pathways	https://www.ncbi.nlm.nih.gov/pmc/articles/PMC7279419/	Additionally, several signaling pathways associated with LOAD might modulate various processes, such as the reduction of amyloid- aggregation and inflammation, regulation of mitochondrial dynamics, and increased neuronal activity [10].

## Sheet: Psilocybin
Hypothesis (using supporting sentences)		(Un)Related	Ref	Subject Entity Name	Relation type	Object Entity Name	URL	Sentence
Based on the evidence provided, it can be hypothesized that Psilocybin may have potential therapeutic effects in the treatment of Alzheimer's disease (AD) through its influence on 5-HT2A receptor-dependent signaling pathways [33]. AD is characterized by the aggregation and misfolding of amyloid-beta (Aβ) [42], and the hyperphosphorylation of tau protein [23,4], both of which contribute to synapti…		Related	1	Amyloid beta-Peptides	ASSOCIATED_WITH	Alzheimer Disease 12	https://www.ncbi.nlm.nih.gov/pmc/articles/PMC2773287/	It is hypothesized that high concentrations of glutamate cause an excess calcium influx through the ion channel that leads to excitotoxicity.10 It has been shown in AD patients that glutamate transporters in glial cells are reduced, while the presence of beta amyloid indirectly stimulates excessive glutamate production.11 This phenomenon is thought to contribute to the neurotoxicity of beta amylo…
		Unrelated	2	NADH	STIMULATES	Dissociation	https://pubmed.ncbi.nlm.nih.gov/2932442/	The NADH-stimulated dissociation of [gamma-32P]ATP is energy-dependent since the stimulation is inhibited by uncouplers of oxidative phosphorylation and is prevented by respiratory chain inhibitors.
		Unrelated	3	flavanoid	TREATS	stress related disorder	https://www.ncbi.nlm.nih.gov/pmc/articles/PMC4005030/	Fruits of Ficus species are rich source of polyphenolic compounds and flavanoids which are responsible for strong antioxidant properties that help in prevention and therapy of various oxidative stress related diseases such as neurodegenerative and hepatic diseases.
		Related	4	Alzheimer's Disease	PRODUCES	tau Proteins	https://pubmed.ncbi.nlm.nih.gov/24059239/	The two molecular hallmarks of AD are amyloid plaques created from an amyloid precursor protein and hyperphosphorylated tau protein that is deposited as neurofibrillary tangles inside neurons.
		Related	5	Alzheimer's Disease	INHIBITS	Signal Transduction Pathways	https://pubmed.ncbi.nlm.nih.gov/31266549/	The above effects of IGF-2 on AD were blocked when the PI3K signaling pathway inhibitor wortmannin was added.
		Unrelated	6	Calcium and Integrin-Binding Protein 1	CAUSES	tumor growth	https://www.ncbi.nlm.nih.gov/pmc/articles/PMC4349696/	Similar results have also been observed for -catulin, another ILK-interacting protein, which induced tumour growth in vivo but had no effect on cell proliferation in vitro [8], suggesting that increased colony numbers occur because of a change in the colony-forming ability but not cell proliferation.
		Unrelated	7	neticonazole	TREATS	tumor growth	https://www.ncbi.nlm.nih.gov/pmc/articles/PMC7463631/	Their study indicated that neticonazole inhibited the promotion of IDB in tumor growth and the production of sEVs and, interestingly, greatly enhanced the survival of tumor-bearing IDB mice, likely due to the capability of neticonazole to induce apoptosis of the CRC tumor cells.
		Related	8	Amyloid beta-Peptides	ASSOCIATED_WITH	Alzheimer Disease 9	https://www.ncbi.nlm.nih.gov/pmc/articles/PMC3622466/	Cognition and its decline associated with brain aging also seems to be variable and possibly open to modifications.1 Studies in humans and animal models suggest that age-related cognitive decline is more likely to be associated with alterations in synaptic connectivity than with neuronal loss and white matter changes.6,7 According to recent studies, alterations of intracellular -secretase mediate…
		Unrelated	9	New medications	TREATS	Hodgkin Disease	https://pubmed.ncbi.nlm.nih.gov/8882953/	Vinorelbine: a new promising drug in Hodgkin's disease.
		Unrelated	10	Complement Inactivating Agents	ASSOCIATED_WITH	tumor growth	https://www.ncbi.nlm.nih.gov/pmc/articles/PMC4615997/	SUSD4 is not the first complement inhibitor implied to regulate tumor growth.
		Unrelated	11	release factor	CAUSES	Bone destruction	https://www.ncbi.nlm.nih.gov/pmc/articles/PMC3431089/	Once settled into the bone, tumor cells release factors that activate matrix resorption leading to bone destruction; this facilitates cancer spread and proliferation [8, 9].
		Unrelated	12	Basis	CAUSES	Hepatitis B Virus-Related Hepatocellular Carcinoma	https://pubmed.ncbi.nlm.nih.gov/34430511/	DISCUSSION: Our findings further the understanding of the genetic basis for HBV-related HCC predisposition in chronic HBV carriers.
		Unrelated	13	hydroxypropyl chitosan	TREATS	Psoriasis	https://pubmed.ncbi.nlm.nih.gov/24904219/	Randomized controlled trial of a water-soluble nail lacquer based on hydroxypropyl-chitosan (HPCH), in the management of nail psoriasis.
		Unrelated	14	Cyclin D	INHIBITS	tumor growth	https://www.ncbi.nlm.nih.gov/pmc/articles/PMC3391253/	Specific inhibition of Cyclin D, E and over expression of CKIs can lead to suppression of tumor growth by cell cycle arrest at the G1 phase, and this provides another possibility for tumor management.
		Related	15	ALZHEIMER DISEASE 8	ASSOCIATED_WITH	Signal Transduction Pathways	https://www.ncbi.nlm.nih.gov/pmc/articles/PMC7072873/	We have also reviewed the current literature on the role of PPP2A PPP2R5D in different signaling pathways that are relevant in autism spectrum disorder, Alzheimer s disease 8, and Parkinson s disease.
Quality score: 3 (makes some logical inferences)		Unrelated	16	protamines	CAUSES	Circulatory depression	https://pubmed.ncbi.nlm.nih.gov/476745/	These results show that an impairment of LV function plays an important part in the circulatory depression produced by protamine.
		Unrelated	17	Bronchodilator Agents	INHIBITS	COPD exacerbation	https://www.ncbi.nlm.nih.gov/pmc/articles/PMC4409821/	Theophylline: Theophylline can be combined with inhaled glucocorticoid and/or long-acting bronchodilators, but the evidence of its efficacy in reducing COPD exacerbations as part of a combination therapy or alone is very limited 127 Antibiotics Regular use of macrolides (erythromycin, clarithromycin and azithromycin) reduces COPD exacerbations 130, but widespread use of macrolides is restrained b…
Hypothesis (using supporting sentences and unrelated sentences)		Related	18	Microhemorrhage	CAUSES	Alzheimer's Disease	https://pubmed.ncbi.nlm.nih.gov/31084613/	The majority of AD patients also have Abeta deposition in cerebral vessels known as cerebral amyloid angiopathy (CAA), microhemorrhages, and vascular co-morbidities, suggesting that cerebrovascular dysfunction contributes to AD etiology.
Based on the evidence provided, we hypothesize that Psilocybin, a psychedelic drug known to activate 5-HT2A receptor-dependent signaling pathways [33], could potentially be used to treat Alzheimer's disease (AD) by modulating various processes associated with the disease. Psilocybin may influence the reduction of amyloid-beta aggregation, a hallmark of AD [4, 20, 22, 27, 42, 53, 71, 72, 78], thro…		Related	19	Familial Alzheimer Disease (FAD)	ASSOCIATED_WITH	Signal Transduction Pathways	https://pubmed.ncbi.nlm.nih.gov/14636889/	Akt/GSK3beta serine/threonine kinases: evidence for a signalling pathway mediated by familial Alzheimer's disease mutations.
		Related	20	Amyloid beta-Peptides	ASSOCIATED_WITH	Alzheimer disease, familial, type 3	https://www.ncbi.nlm.nih.gov/pmc/articles/PMC8476544/	Although the physiological relevance of the fragments generated is not fully understood, one of these, the amyloid-beta peptide (A ) originating from the transmembrane domain of the APP protein, is the main component of brain amyloid plaques in Alzheimer s disease (AD)3,4.
		Unrelated	21	arginine	ASSOCIATED_WITH	vascular inflammations	https://pubmed.ncbi.nlm.nih.gov/20053922/	Emphasis will be placed on the ability of L-arginine to modulate the vascular inflammatory and systemic hormonal milieu, which in turn may have a positive effect on vascular endothelial function.
		Related	22	Amyloid beta-Peptides	ASSOCIATED_WITH	Familial Alzheimer Disease (FAD)	https://pubmed.ncbi.nlm.nih.gov/1465129/	Mutation of the beta-amyloid precursor protein in familial Alzheimer's disease increases beta-protein production.
		Related	23	tau Proteins	CAUSES	Alzheimer's Disease	https://pubmed.ncbi.nlm.nih.gov/1527090/	It has been suggested that hyperphosphorylation of the tau protein in neurofibrillary tangles may be relevant to the etiology of Alzheimer's disease and that at least one of the hyperphosphorylated sites lies within a consensus sequence for the p34cdc2/cdc28 family of kinases.
		Unrelated	24	Mood Stabilizers	ASSOCIATED_WITH	Sturge-Weber Syndrome	https://www.ncbi.nlm.nih.gov/pmc/articles/PMC5866161/	Second, the result is consistent with studies indicating that mood stabilizers per se influence SWS expression.
		Related	25	Amyloid beta-Peptides	CAUSES	Alzheimer Disease 7	https://www.ncbi.nlm.nih.gov/pmc/articles/PMC2723955/	The techniques were applied to the detection of amyloid-beta derived diffusible ligands (ADDLs) which play an important role in the molecular pathogenesis of Alzheimer s Disease.7
		Unrelated	26	Poloxamers	TREATS	Periodontal Diseases	https://www.ncbi.nlm.nih.gov/pmc/articles/PMC8399853/	For example, using poloxamers, an in situ gel preparation containing moxifloxacin and simvastatin was prepared as a transport drug system to treat periodontal disease.
		Related	27	Amyloid beta-Peptides	TREATS	Alzheimer's Disease	https://pubmed.ncbi.nlm.nih.gov/17105434/	The biology, structure and physiological properties of beta-amyloid peptide and related proteases (secretases) are discussed, as well as existing therapeutics and future strategies for the treatment of Alzheimer's disease.
		Unrelated	28	1-Methyl-3-isobutylxanthine	TREATS	SCLEROSING CHOLANGITIS, NEONATAL	https://www.ncbi.nlm.nih.gov/pmc/articles/PMC2229362/	The open time interval histogram obtained from an NSC channel with IBMX treatment was also fitted by one exponential function (Fig. 5 B).
		Related	29	Signal Transduction Pathways	COEXISTS_WITH	Familial Alzheimer Disease (FAD)	https://www.ncbi.nlm.nih.gov/pmc/articles/PMC8451546/	Hence, the discovery of possible signaling pathways linked to familial Alzheimer s disease (FAD), and in turn, a possible therapeutic strategy design could be improved by using these types of interactome analyses.
		Unrelated	30	Vaccines	CAUSES	cervical abnormality	https://pubmed.ncbi.nlm.nih.gov/27738056/	Postvaccination incidence of 4vHPV vaccine and nonvaccine HPV types, and risk of cervical cytological abnormalities, were assessed in relation to time to completion of all 3 vaccine doses.
		Unrelated	31	BPS	TREATS	Fatty Liver	https://www.ncbi.nlm.nih.gov/pmc/articles/PMC2844818/	In addition, the direct protective action of BPS on hepatic cells (38) may contribute to improvements in the hepatic steatosis.
		Unrelated	32	calcium oxalate	ASSOCIATED_WITH	metabolic disturbance	https://pubmed.ncbi.nlm.nih.gov/18060273/	The impact of these metabolic disturbances can be also evaluated by means of the high supersaturation obtained for calcium oxalate and calcium phosphate which suggests the way those factors could be influencing crystal nucleation and, consequently, lead to renal stones formation in this group of patients.
Quality score: 3 (mentions some detail mechanisms and makes some logical inferences)		Related	33	Psilocybin	STIMULATES	Signal Transduction Pathways	https://www.ncbi.nlm.nih.gov/pmc/articles/PMC3552246/	Psychedelic drugs, such as lysergic acid diethylamide (LSD) and psilocybin, activate 5-HT2A receptor-dependent signaling pathways [11], and induce alterations in cognition and perception that share similarities with some of the symptoms in schizophrenic patients [12].
		Related	34	Alzheimer Disease, Late Onset	ASSOCIATED_WITH	Signal Transduction Pathways	https://www.ncbi.nlm.nih.gov/pmc/articles/PMC7279419/	Additionally, several signaling pathways associated with LOAD might modulate various processes, such as the reduction of amyloid- aggregation and inflammation, regulation of mitochondrial dynamics, and increased neuronal activity [10].
Hypothesis (using relations and unrelated relations)		Related	35	Psilocybin	ASSOCIATED_WITH	Fermentation	https://pubmed.ncbi.nlm.nih.gov/32224264/	Further rational engineering resulted in a final production strain producing 627 140 mg/L of psilocybin and 580 276 mg/L of the dephosphorylated degradation product psilocin in triplicate controlled fed-batch fermentations in minimal synthetic media.
Based on the evidence provided, it can be hypothesized that Psilocybin may have potential therapeutic effects in the treatment of Alzheimer's disease. Alzheimer's disease is associated with the production of amyloid beta-peptides and tau proteins, both of which have been linked to the progression of the disease [1, 4, 23, 25, 42, 44, 55, 71, 75, 78]. Furthermore, Alzheimer's disease has been foun…		Unrelated	36	STEP 2	CAUSES	Pervasive Development Disorder	https://www.ncbi.nlm.nih.gov/pmc/articles/PMC6287949/	Functional similarity layer is the instantiation of methodology step 1, while the classifier layer implements the steps 2 and 3 of proposed methodology (Fig 1).To predict novel ASD candidate genes from genes disrupted by de novo CNVs in patients, we used our best classifier, namely the RF classifier trained and tested on Resnik semantic similarity matrix, calculated using HD and non-mental genes.
		Unrelated	37	Bifunctional epoxide hydrolase 2	INHIBITS	Encephalitis	https://pubmed.ncbi.nlm.nih.gov/34836168/	Inhibition of Soluble Epoxide Hydrolase Is Protective against the Multiomic Effects of a High Glycemic Diet on Brain Microvascular Inflammation and Cognitive Dysfunction.
		Unrelated	38	buserelin	ASSOCIATED_WITH	Hypos	https://pubmed.ncbi.nlm.nih.gov/2104770/	Thus, osteopenia generated by a 4-week period of buserelin-mediated hypo-estrogenism is reversible by withdrawing buserelin for 4 weeks.
		Unrelated	39	Glucose Gel	TREATS	Neonatal hypoglycemia	https://pubmed.ncbi.nlm.nih.gov/24075361/	Dextrose gel for neonatal hypoglycaemia (the Sugar Babies Study): a randomised, double-blind, placebo-controlled trial.
		Related	40	tau Proteins	STIMULATES	Alzheimer's Disease	https://pubmed.ncbi.nlm.nih.gov/9147408/	Dependence of cerebrospinal fluid Tau protein levels on apolipoprotein E4 allele frequency in patients with Alzheimer's disease.
		Related	41	Amyloid beta-Peptides	INHIBITS	Alzheimer's Disease	https://pubmed.ncbi.nlm.nih.gov/19723623/	Therefore, the inhibitory effect of PEDF appears to be mediated via the processing of VEGF-R2 by gamma-secretase. gamma-Secretase generates the amyloid-beta (Abeta) peptide of Alzheimer disease from its precursor (amyloid precursor protein).
		Related	42	Amyloid beta-Peptides	ASSOCIATED_WITH	Alzheimer Disease 7	https://www.ncbi.nlm.nih.gov/pmc/articles/PMC7989959/	Aggregation and misfolding of amyloid-beta (A ) is a potential mechanism in AD patients.7 A monomers assemble into A O (A oligomers) and fibrils and are then distributed into the circulating blood or cerebrospinal fluid (CSF).1 The A O is neurotoxic and is highly correlated with severe AD.
		Related	43	Amyloid beta-Peptides	ASSOCIATED_WITH	Alzheimer Disease, Late Onset	https://pubmed.ncbi.nlm.nih.gov/14692704/	The present study was carried out to examine the coincidence of these small vessel pathologies during the development of cognitive deficits, amyloid beta-protein (A beta) deposition, and neurofibrillary tangle (NFT) formation in sporadic late-onset AD.
		Related	44	Amyloid beta-Peptides	CAUSES	Alzheimer Disease, Late Onset	https://www.ncbi.nlm.nih.gov/pmc/articles/PMC4045094/	In this study, we investigate the influence of interactions between genes previously associated with Alzheimer s Disease (AD) on amyloid-beta (A ) load in an effort to better understand the genetic etiology of A deposition and, by extension, risk for LOAD.
		Unrelated	45	cytokine	CAUSES	SCLEROSING CHOLANGITIS, NEONATAL	https://www.ncbi.nlm.nih.gov/pmc/articles/PMC3205932/	In-vitro induction of NSCs with cytokine revealed activation of PI3K-Akt dependent phosphorylation of N-COR which may throw some lights about the possible molecular mechanism that keeps NSCs in an undifferentiated state (Hermanson et al., 2002).
		Unrelated	46	diazepam	INHIBITS	tumor growth	https://pubmed.ncbi.nlm.nih.gov/9747871/	In vivo, the combination of lonidamine and diazepam was significantly more effective in reducing glioblastoma tumor growth than either drug alone (two-sided P<.01, Mann-Whitney U test, comparing growth of treated tumors with that of untreated tumors); this tumor growth retardation was maintained as long as treatment was given.
Quality score: 2 (not many detail mechanisms mentioned. Does not say how psilocybin affects tau proteins or amyloid beta-peptides. Not much evidence to support hypothesis)		Unrelated	47	acetazolamide	CAUSES	tumor growth	https://www.ncbi.nlm.nih.gov/pmc/articles/PMC5095030/	Our data further demonstrate that acetazolamide-induced tumor growth inhibition is associated with reduced cancer cell proliferation in hypoxic zones (Figure 6A and 6B), which is in accordance with what we observe following selective knockdown of CAIX (Figure 7D).
		Unrelated	48	octreotide	TREATS	INGUINAL LYMPH NODE METASTASIS	https://pubmed.ncbi.nlm.nih.gov/10948323/	All rats implanted mGH3, but not administered treatment, developed inguinal lymph node metastases, whereas none of those implanted mGH3 and treated with octreotide developed such metastases.
Hypothesis (using no additional information)		Unrelated	49	Perfluorooctanesulfonate	ASSOCIATED_WITH	Degenerative polyarthritis	https://pubmed.ncbi.nlm.nih.gov/21709135/	In this study, the authors investigated the association of OA with PFOA and PFOS in a population of 49,432 adults from 6 PFOA-contaminated water districts in the mid-Ohio Valley (2005-2006).
Hypothesis: Psilocybin, a naturally occurring psychedelic compound found in certain species of mushrooms, may have potential therapeutic effects in the treatment of Alzheimer's disease. The underlying mechanism could be related to its ability to promote neurogenesis and synaptic plasticity. Alzheimer's disease is characterized by progressive neuronal loss and synaptic dysfunction, leading to cogn…		Related	50	Familial Alzheimer Disease (FAD)	INHIBITS	Signal Transduction Pathways	https://pubmed.ncbi.nlm.nih.gov/11146108/	We have previously reported that familial Alzheimer's disease linked presenilin-1 variants downregulate the signaling pathway of the UPR by affecting the phosphorylation of Ire1 alpha.
		Unrelated	51	N-oxydiethylene-2-benzothiazole sulfenamide	ASSOCIATED_WITH	IMMUNODEFICIENCY, COMMON VARIABLE, 10	https://www.ncbi.nlm.nih.gov/pmc/articles/PMC8607297/	After meeting with David s mother, the ethics consultants communicated with the MBS team and documented in the chart that they believed David s reduced autonomy to provide assent for MBS was appropriately considered by his mother and that she understood the implications of surgery for David both short and long term.
		Unrelated	52	Hepatitis B virus DNA	ASSOCIATED_WITH	Hepatic impairment	https://www.ncbi.nlm.nih.gov/pmc/articles/PMC7593059/	Hepatocellular carcinoma (HCC) is among the most common malignancies of high morbidity and mortality, especially in China.[1 3,21] Among which chronic hepatitis B virus (HBV) infection is highly related to HCC development.[4 7] Serum HBV-DNA level is associated with progressive hepatic impairment and it has been proved to be correlated to cirrhosis progression.[8] The contribution of persistent H…
		Related	53	Amyloid beta-Peptides	ASSOCIATED_WITH	Alzheimer Disease, Early Onset	https://pubmed.ncbi.nlm.nih.gov/7998778/	Amyloid beta protein levels in cerebrospinal fluid are elevated in early-onset Alzheimer's disease.
		Unrelated	54	Adenosine Phosphosulfate	ASSOCIATED_WITH	tumor growth	https://www.ncbi.nlm.nih.gov/pmc/articles/PMC5716001/	Further studies showed that APS can delay the tumor growth of A549 xenograft in vivo.
		Related	55	Amyloid beta-Peptides	STIMULATES	Alzheimer's Disease	https://pubmed.ncbi.nlm.nih.gov/8761337/	Moreover, beta-amyloid was capable of inducing an AD-like phenotype for K+ channels and Cp20 in otherwise normal fibroblasts, providing additional evidence for the potential involvement of these components in AD and suggesting a possible pathological consequence of soluble beta-amyloid elevation in AD.
		Related	56	Microhemorrhage	COEXISTS_WITH	Alzheimer's Disease	https://pubmed.ncbi.nlm.nih.gov/21392891/	CAA and cerebral microhemorrhages in AD have similar spatial distribution of lobar predominance, and their accumulation similarly affect cognitive function.
		Related	57	Amyloid beta-Peptides	ASSOCIATED_WITH	Alzheimer's Disease	https://pubmed.ncbi.nlm.nih.gov/3555492/	The mouse homolog of the human amyloid beta protein (AD-AP) gene is located on the distal end of mouse chromosome 16: further extension of the homology between human chromosome 21 and mouse chromosome 16.
		Unrelated	58	Relate - vinyl resin	CAUSES	Bronchiectasis	https://pubmed.ncbi.nlm.nih.gov/7973165/	Review of literature relating to the etiologies of bronchiectasis does not substantiate a congenital origin in most; it appears that the majority of cases of bronchiectasis result from prior infections of the lungs, either viral or bacterial, including mycobacterial.
		Unrelated	59	SCLEROSING CHOLANGITIS, NEONATAL	PRODUCES	Integrins	https://www.ncbi.nlm.nih.gov/pmc/articles/PMC2747473/	Moreover, we found that adult NSCs express the laminin receptor 6 1 integrin (VLA6), which is lost as they differentiate, and we demonstrate that this receptor plays a critical role in NSC adhesion to vascular cells and in regulating the SVZ lineage proliferation in vivo.
		Related	60	tau Proteins	INHIBITS	Alzheimer's Disease	https://pubmed.ncbi.nlm.nih.gov/17721707/	Furthermore, total tau protein levels were slightly decreased in both FTLD and AD as compared to control subjects.
		Unrelated	61	Macrophage Chemotactic Factors	ASSOCIATED_WITH	Chronic Condition	https://www.ncbi.nlm.nih.gov/pmc/articles/PMC5654317/	The second category of MCFs captures lifetime costs associated with chronic conditions or other health outcomes (HIV, HCV, birth outcomes, QALYs).
		Related	62	Amyloid beta-Peptides	ASSOCIATED_WITH	Alzheimer Disease 11	https://www.ncbi.nlm.nih.gov/pmc/articles/PMC4040417/	Impaired mitochondrial protein import due to the amyloid beta peptide (A ) has been observed in Alzheimer s disease (AD)11, suggesting that mutant htt may cause a similar dysfunction in yeast.
		Unrelated	63	Transcription Repressor/Corepressor	INHIBITS	tumor growth	https://www.ncbi.nlm.nih.gov/pmc/articles/PMC2376791/	Thus, an active transcriptional repressor is more efficient for the inhibition of tumour growth than overexpression of a DBD.
Quality score: 2 (makes some logical inferences, but no references or evidence to support hypothesis)		Related	64	Signal Transduction Pathways	COEXISTS_WITH	ALZHEIMER DISEASE 4	https://www.ncbi.nlm.nih.gov/pmc/articles/PMC6110736/	On the other hand, aberrant activation of synapse weakening signalling pathways has been reported in several Alzheimer s disease (AD) models2 4, suggesting that these signalling pathways represent a crucial interplay between physiology and the onset of disease-associated pathophysiology.
		Related	65	Alzheimer's Disease	ASSOCIATED_WITH	Signal Transduction Pathways	https://pubmed.ncbi.nlm.nih.gov/10095092/	Thus, in AD, there is impairment in the Galphai-associated signaling pathway in neurons.
(Highlight in red: incorrect citations)		Unrelated	66	Granulocyte-Macrophage Colony-Stimulating Factor	CAUSES	tumor growth	https://pubmed.ncbi.nlm.nih.gov/11280804/	On the one hand, GM-CSF can promote tumor cell growth, survival, and even metastasis.
		Unrelated	67	Antithrombotic Agents	TREATS	Myocardial Infarction	https://www.ncbi.nlm.nih.gov/pmc/articles/PMC5412341/	In diabetics, the therapeutic management of MI mainly relies on the beta blockers, angiotensin converting enzyme inhibitors/angiotensin-II receptor blockers, nitrates, and antithrombotic agents.
		Related	68	Amyloid beta-Peptides	COMPLICATES	Alzheimer's Disease	https://www.ncbi.nlm.nih.gov/pmc/articles/PMC7388140/	Elevated cortisol levels and HPA axis dysfunction are implicated in chronic stress, which releases amyloid beta (A ) that causes and/or worsens AD (109).
		Related	69	Signal Transduction Pathways	COEXISTS_WITH	Alzheimer disease, familial, type 3	https://www.ncbi.nlm.nih.gov/pmc/articles/PMC5498490/	Parent compound 1 did not show any influence against these signaling pathways up to 10 M in AD-293 and HeLa cells (Table 1).
		Unrelated	70	dicaffeoylquinic acid	INHIBITS	RAINE SYNDROME	https://www.ncbi.nlm.nih.gov/pmc/articles/PMC8446017/	More specifically, 3,5-dicaffeoylquinic acid inhibits ROS/RNS production and MMP-9 transcriptional synthesis by reducing the iNOS expression level, and reducing the mechanism of MMP-9 on claudin-5, occludin and ZO-1 degradation to protect BBB injury induced by cerebral ischemia.
		Related	71	Amyloid beta-Peptides	CAUSES	Alzheimer's Disease	https://pubmed.ncbi.nlm.nih.gov/2907602/	It is thus very tempting to speculate that a defect (or defects) of the amyloid beta protein gene is the cause of Alzheimer's disease.
		Related	72	Amyloid beta-Peptides	CAUSES	ALZHEIMER DISEASE 5	https://www.ncbi.nlm.nih.gov/pmc/articles/PMC6946617/	The deposition of beta-amyloid is an initial step in the pathogenesis of AD.5 However, the exact role of amyloid deposition and neurofibrillary tangle formation in MCI has not been studied extensively.
		Unrelated	73	ACIDOPHILUS	TREATS	Parkinson Disease	https://www.ncbi.nlm.nih.gov/pmc/articles/PMC9289355/	(2016) used 60 mg per tablet of two LAB: L. acidophilus and B. infantis, twice daily for 3 months in 40 PD patients and reported alleviation of abdominal pain and bloating (Georgescu et al. 2016).
		Related	74	Amyloid beta-Peptides	ASSOCIATED_WITH	ALZHEIMER DISEASE 18	https://www.ncbi.nlm.nih.gov/pmc/articles/PMC7864928/	Considering the potential functions of the PVS system, studies had proved that the PVS waste drainage system contributed to a larger portion of interstitial solutes clearance, such as amyloid beta (A ), preventing A deposition that was thought to be pathogenic in AD18,22.
		Related	75	tau Proteins	ASSOCIATED_WITH	Alzheimer's Disease	https://pubmed.ncbi.nlm.nih.gov/2424016/	Microtubule-associated protein tau (tau) is a major antigenic component of paired helical filaments in Alzheimer disease.
		Related	76	Amyloid beta-Peptides	CAUSES	Alzheimer Disease, Early Onset	https://pubmed.ncbi.nlm.nih.gov/10230703/	Genetic studies on some families have shown that mutations in the genes encoding beta-amyloid precursor protein and presenilins 1 and 2 are responsible for early-onset AD.
		Related	77	Signal Transduction Pathways	COEXISTS_WITH	Alzheimer's Disease	https://pubmed.ncbi.nlm.nih.gov/12900169/	This review discusses available biological data that highlight the therapeutic potential of the insulin-IGF-1 signaling pathway in AD.
		Related	78	Amyloid beta-Peptides	CAUSES	Familial Alzheimer Disease (FAD)	https://pubmed.ncbi.nlm.nih.gov/9562460/	The significance of amyloid beta protein, especially those ending at the 42nd residue (Abeta42), in the pathogenesis of familial Alzheimer's disease (FAD) linked to the mutations of presenilins, was examined by transfection studies using cultured cells and immunohistochemical analysis of autopsied brains.
		Unrelated	79	Neural Cell Adhesion Molecules	ASSOCIATED_WITH	aggressive cancer	https://www.ncbi.nlm.nih.gov/pmc/articles/PMC3561198/	Interestingly, low NCAM expression has been shown to relate with clinically aggressive cancers and vice-versa [62].
		Related	80	Alzheimer disease, familial, type 3	COEXISTS_WITH	Fermentation	https://www.ncbi.nlm.nih.gov/pmc/articles/PMC7532642/	Such weak activity of KstD211 could enable the HGMS2 strain to accumulate 4-AD, accompanied by a small fraction of ADD during -sitosterol fermentations.
		Related	81	tau Proteins	ASSOCIATED_WITH	Familial Alzheimer Disease (FAD)	https://pubmed.ncbi.nlm.nih.gov/19782073/	In this work, we review the links between beta amyloid peptide, tau protein and GSK3 that occur in familial Alzheimer disease.

## Sheet: Lithium
Hypothesis (using supporting sentences)		(Un)Related	Ref	Subject Entity Name	Relation type	Object Entity Name	URL	Sentence
Based on the available evidence, we hypothesize that lithium may exert a therapeutic effect on Alzheimer's disease (AD) through multiple mechanisms. Firstly, lithium has been shown to stimulate glucose metabolism, which could potentially counteract the reduced glucose metabolism observed in AD [16, 19]. Secondly, lithium's ability to modulate DNA methylation of BDNF exons [1] and its potential to…		Related	1	lithium	ASSOCIATED_WITH	DNA Methylation	https://www.ncbi.nlm.nih.gov/pmc/articles/PMC4294125/	In the present study, it was examined whether increased expression of BDNF gene by lithium was modulated via DNA methylation of BDNF exons.
		Related	2	lithium	ASSOCIATED_WITH	catecholamine metabolic process	https://pubmed.ncbi.nlm.nih.gov/6138910/	A positive effect of lithium on the catecholamine metabolism in the rabbit CNS was observed.
		Unrelated	3	Betamethasone Dipropionate Cream	TREATS	Mycosis Fungoides	https://pubmed.ncbi.nlm.nih.gov/16172308/	To determine if a therapeutic regimen of twice-weekly applications of mechlorethamine hydrochloride and betamethasone dipropionate cream is effective in the treatment of early-stage mycosis fungoides while increasing cutaneous tolerance.
		Unrelated	4	Interleukin-35	STIMULATES	tumor growth	https://www.ncbi.nlm.nih.gov/pmc/articles/PMC7056532/	IL35 expression in Tregs promotes CD8+ T-cell exhaustion in melanoma and colorectal cancer (21) and has also been shown to facilitate tumor growth via accumulation of myeloid-derived suppressor cells (MDSCs) and induction of angiogenesis (26).
		Related	5	Post-Translational Protein Processing	COEXISTS_WITH	Alzheimer Disease 14	https://www.ncbi.nlm.nih.gov/pmc/articles/PMC2658606/	However, proteomics techniques have helped to advance knowledge about AD by identifying irregularities in protein expression and post-translational modifications (PTMs) in affected AD brain regions.14, 18 These observations have helped formulate and support hypotheses for disease pathogenesis.
		Unrelated	6	Cytotoxic agent (product)	ASSOCIATED_WITH	tumor growth	https://pubmed.ncbi.nlm.nih.gov/14710367/	IGF1R downregulation blocks tumour growth and metastasis, and enhances sensitivity to cytotoxic drugs and irradiation.
		Unrelated	7	tenofovir disoproxil fumarate	TREATS	Hepatic impairment	https://www.ncbi.nlm.nih.gov/pmc/articles/PMC4037326/	Mild to moderate hepatic impairment in patients does not warrant avoidance of EVG/COBI/FTC/TDF therapy.
		Related	8	Alzheimer's Disease	ASSOCIATED_WITH	Biochemical Pathway	https://pubmed.ncbi.nlm.nih.gov/3185859/	One of the characteristics of Alzheimer's disease is the early loss of neurons in pathways involved in processing olfactory information.
		Unrelated	9	Imprime PGG	INHIBITS	tumor growth	https://www.ncbi.nlm.nih.gov/pmc/articles/PMC9178990/	These data show that Imprime-based treatment prompts a shift in the immune microenvironment of a tumor in situ, eliciting enhanced tumor growth inhibition in concert with anti-angiogenic therapy.
		Unrelated	10	BLZ 945	ASSOCIATED_WITH	tumor growth	https://www.ncbi.nlm.nih.gov/pmc/articles/PMC9313120/	Some molecules targeting cytokines revealed a significant impact on tumor growth and management of tumor microenvironment such as BLZ945, CSL324 and Reparixin, which are more and more being evaluated in clinical trials (Table 1).
		Unrelated	11	phosphatidylinositols	ASSOCIATED_WITH	tumor growth	https://pubmed.ncbi.nlm.nih.gov/11948419/	Thus, Y240A and Y315A are involved in the ability of MMAC/PTEN to dephosphorylate PtdIns and regulate tumor cell growth in vitro and in vivo.
		Related	12	lithium	ASSOCIATED_WITH	sodium/potassium-exchanging ATPase activity	https://pubmed.ncbi.nlm.nih.gov/6149752/	Effects of lithium, diazepam and propranolol on brain Na+-K+-ATPase activity in stress-exposed mice.
		Related	13	Alzheimer disease, familial, type 3	ASSOCIATED_WITH	Cross Reactions	https://www.ncbi.nlm.nih.gov/pmc/articles/PMC7756316/	The loss of ER mitochondria crosstalk has been previously associated with Alzheimer's disease (AD) type 3 and 4 (PSEN1: OMIM 607822; PSEN2: OMIM 600759 [https://www.omim.org/]), recessive cerebellar atrophy, visual impairment, psychomotor retardation (EMC1: OMIM 616875), dominant amyotrophic lateral sclerosis (ALS) type 8 (VAPB: OMIM 608627), juvenile ALS type 16 (SIGMAR1; OMIM 601978), Parkinson…
		Related	14	lithium	INHIBITS	amyloid precursor protein catabolic process	https://pubmed.ncbi.nlm.nih.gov/12761548/	Here we show that therapeutic concentrations of lithium, a GSK-3 inhibitor, block the production of Abeta peptides by interfering with APP cleavage at the gamma-secretase step, but do not inhibit Notch processing.
		Related	15	lithium	ASSOCIATED_WITH	glucose metabolism	https://pubmed.ncbi.nlm.nih.gov/681292/	These observations are discussed in terms of the effects of lithium on glucose metabolism and with particular emphasis on the ability of lithium to increase the release of glucagon.
		Related	16	lithium	STIMULATES	glucose metabolism	https://www.ncbi.nlm.nih.gov/pmc/articles/PMC9368914/	The data presented in this study shows that lithium was able to stimulate glucose metabolism by inducing the uptake of glucose and by enhancing the glycolytic flux, which restored ATP levels in hippocampal cultures (Figure 6).
		Unrelated	17	arsenal	INHIBITS	Arthropathy associated with infection	https://pubmed.ncbi.nlm.nih.gov/35671527/	This novel solution may provide a significant tool in the arsenal to treat and/or prevent PJI and other wound infections.
Quality score: 5 (provides many detail mechanisms and logical inferences)		Unrelated	18	B-Cell Leukemia 2 Family Proteins	ASSOCIATED_WITH	Neoplastic Cell Transformation	https://pubmed.ncbi.nlm.nih.gov/10478958/	To study the possible roles of bcl-2 family proteins in oncogenesis and cytodifferentiation of odontogenic epithelium, the expression of bcl-2, bcl-x and bax proteins was examined immunohistochemically in tooth germs and various types of ameloblastoma.
		Related	19	Alzheimer Disease, Early Onset	ASSOCIATED_WITH	glucose metabolism	https://www.ncbi.nlm.nih.gov/pmc/articles/PMC7993730/	In presenile-onset AD, the reduction in glucose metabolism is often centered in the parietotemporal association cortex, which is consistent with our study sample, whereas in senile-onset AD, glucose metabolism tends to be reduced in the limbic system and in the frontal lobe, which would be in line with studies reporting reduced hippocampal metabolism [30, 31].
Hypothesis (using supporting sentences and unrelated sentences)		Unrelated	20	Basis	TREATS	Medullary carcinoma	https://pubmed.ncbi.nlm.nih.gov/27938622/	Mutation analysis of the RET may provide a theoretical basis for the prevention, diagnosis and treatment of MTC.
Based on the available evidence, it can be hypothesized that lithium may exert a therapeutic effect on Alzheimer's disease (AD) through multiple mechanisms. Firstly, lithium has been shown to increase the expression of the BDNF gene, which could potentially counteract neuronal loss, a characteristic feature of AD [1,8]. This increase in BDNF expression may be modulated via DNA methylation of BDNF…		Unrelated	21	Amino Acids, Branched-Chain	CAUSES	tumor growth	https://www.ncbi.nlm.nih.gov/pmc/articles/PMC8749315/	It remains unclear whether these alterations in systemic BCAAs metabolism contribute to tumor growth or metastasis.
		Unrelated	22	Adapt (substance)	ASSOCIATED_WITH	Cardiovascular Diseases	https://pubmed.ncbi.nlm.nih.gov/31642816/	In conclusion, these findings indicate that chronic low dose of L-NAME treatment has a potential to trigger adapting mechanisms to attenuate some cardiovascular disorders.
		Unrelated	23	INVESTIGATIONAL AGENTS	INHIBITS	Malignant Neoplasms	https://www.ncbi.nlm.nih.gov/pmc/articles/PMC4870717/	Many experimental chemopreventive agents have been derived from plant chemistry of foods that are associated with a decreased risk of developing cancers of the gastrointestinal tract 6-10.
		Unrelated	24	Century (brand of multivitamin)	ASSOCIATED_WITH	Recurrent depression	https://www.ncbi.nlm.nih.gov/pmc/articles/PMC7859672/	Due to its strong relapse-preventive effect, lithium has been used as a first line therapy for bipolar disorders for more than half a century, but it is also used in recurrent depression, schizoaffective disorder, alcoholism and cluster headaches (Erden et al., 2013; Timmer and Sands, 1999).
		Unrelated	25	Basis	TREATS	Latent Infection	https://pubmed.ncbi.nlm.nih.gov/23437705/	In low prevalence countries, where identification and treatment of latent TB infection (LTBI) are basis of national programmes against tuberculosis, the diagnosis is focused mainly on tuberculin skin test (TST) and interferon gamma release assay (IGRA), both of which seem to be imperfect.
		Related	26	lithium	ASSOCIATED_WITH	NADPH dehydrogenase activity	https://pubmed.ncbi.nlm.nih.gov/15381828/	Therefore, we hypothesized that modulation of NOS may be involved in the long-term effects of antidepressants and lithium, and studied the influence of acute and chronic administration of citalopram, alone or in combination with lithium, on NOS activity in hippocampus, cerebellum, and frontal cortex, by determination of L-citrulline being formed.
		Related	27	lithium	ASSOCIATED_WITH	cAMP biosynthetic process	https://pubmed.ncbi.nlm.nih.gov/2166903/	Lithium attenuated vasoactive intestinal polypeptide-stimulated cyclic AMP formation by 50%, with a dose dependence similar to that of its actions on KA-evoked release.
		Related	28	Heredity	COEXISTS_WITH	Alzheimer's Disease	https://pubmed.ncbi.nlm.nih.gov/1977419/	Genetic investigations suggest a role for heredity in AD, whereas PD appears to be an acquired, nongenetic disorder.
		Related	29	lithium	STIMULATES	Macromolecular alteration	https://pubmed.ncbi.nlm.nih.gov/11341484/	These results suggested that lithium might induce the conformational changes of the dopamine D2 receptors.
		Unrelated	30	cabozantinib	INHIBITS	tumor growth	https://www.ncbi.nlm.nih.gov/pmc/articles/PMC3683553/	Other studies examining a pancreatic neuroendocrine tumor model demonstrated similar inhibition of tumor growth, invasion, and metastasis using either cabozantinib or a combination of sunitinib and PF-04217903 in experimental animals[50].
		Unrelated	31	buprenorphine	TREATS	Sexual problem	https://www.ncbi.nlm.nih.gov/pmc/articles/PMC8042937/	Methadone doses have been related to decreasing orgasms and greater sexual problems compared with buprenorphine treatment [50, 51].
		Unrelated	32	Iodine deficiency diseases	ASSOCIATED_WITH	Severe malnutrition	https://www.ncbi.nlm.nih.gov/pmc/articles/PMC4216384/	Population effects of severe iodine deficiency, termed iodine deficiency disorders (IDDs), include endemic goiter, hypothyroidism, cretinism, decreased fertility rate, increased infant mortality and mental retardation [8].
		Related	33	Alzheimer's Disease	ASSOCIATED_WITH	NADPH dehydrogenase activity	https://www.ncbi.nlm.nih.gov/pmc/articles/PMC4226164/	More specifically, there are reductions in Complex I and IV Vmax activity in AD subjects, along with minimal differences in ATP-synthase activity (Mecocci et al., 1994; Maurer et al., 2000; Bosetti et al., 2002).
		Related	34	Signal Transduction Pathways	COEXISTS_WITH	ALZHEIMER DISEASE 4	https://www.ncbi.nlm.nih.gov/pmc/articles/PMC6110736/	On the other hand, aberrant activation of synapse weakening signalling pathways has been reported in several Alzheimer s disease (AD) models2 4, suggesting that these signalling pathways represent a crucial interplay between physiology and the onset of disease-associated pathophysiology.
		Related	35	DNA Methylation	COEXISTS_WITH	Alzheimer Disease, Late Onset	https://pubmed.ncbi.nlm.nih.gov/26401555/	Recent epigenome-wide association studies have confirmed the importance of epigenetic effects mediated by DNA methylation in late-onset Alzheimer's disease (LOAD).
Quality score: 5 (provides many detail mechanisms and logical inferences)		Related	36	lithium	ASSOCIATED_WITH	Chemosensitization	https://pubmed.ncbi.nlm.nih.gov/1088364/	Hence, chronic administration of lithium leads to potentiation in its action of the serotonin-negative and central adreno-negative componets and to extenuating the peripheral adreno-negative component.
		Unrelated	37	Selective Serotonin Reuptake Inhibitors	INHIBITS	Impulsive aggression	https://pubmed.ncbi.nlm.nih.gov/12590628/	Results from open-label and placebo-controlled trials suggest that the selective serotonin reuptake inhibitors reduce impulsive aggressive behavior.
Hypothesis (using relations and unrelated relations)		Unrelated	38	Psychostimulant Drugs	ASSOCIATED_WITH	Drug Dependence	https://pubmed.ncbi.nlm.nih.gov/21994482/	Recently, we reported that the phosphorylation levels of ezrin-radixin-moesin (ERM) proteins are regulated by psychostimulant drugs in the nucleus accumbens, a brain area important for drug addiction.
Based on the evidence provided, it can be hypothesized that lithium may have potential therapeutic effects in the treatment of Alzheimer's disease through multiple mechanisms. Lithium has been associated with DNA methylation [1], a process that has been found to coexist with Alzheimer's disease [35]. This suggests that lithium could potentially modify the disease's progression through epigenetic …		Unrelated	39	Transforming Growth Factor beta	ASSOCIATED_WITH	SCLEROSING CHOLANGITIS, NEONATAL	https://www.ncbi.nlm.nih.gov/pmc/articles/PMC9174158/	Similarly, the Chst8 gene was not expressed upon TGF addition in the shSMAD3 NSCs (Fig. 2e).
		Unrelated	40	DNA, Plant	INHIBITS	tumor growth	https://pubmed.ncbi.nlm.nih.gov/12034103/	When administrated in vivo, plant DNA can inhibit tumor growth in situ or metastasis in tumor-bearing mice.
		Related	41	Alzheimer's Disease	ASSOCIATED_WITH	Protein-Protein Interaction	https://pubmed.ncbi.nlm.nih.gov/8380879/	This compound, currently in clinical trials as a potential therapeutic agent for Alzheimer's disease, caused a highly significant increase in cytoskeletal protein-protein interactions.
		Unrelated	42	4-diphenylacetoxy-1,1-dimethylpiperidinium	ASSOCIATED_WITH	tumor growth	https://www.ncbi.nlm.nih.gov/pmc/articles/PMC5244394/	The above data indicated that ACh could act through M3R to activate EGFR signaling and promote cell proliferation in gastric cancer cells.The M3R inhibitors inhibit gastric tumor formationTo further explore the function of M3R in gastric cancer growth in vivo, two M3R antagonist, 4-DAMP and darifenacin, were used to investigated the potential role of M3R in tumor xenografts growth in nude mice.
		Related	43	Amyloid beta-Peptides	ASSOCIATED_WITH	ALZHEIMER DISEASE 18	https://www.ncbi.nlm.nih.gov/pmc/articles/PMC7864928/	Considering the potential functions of the PVS system, studies had proved that the PVS waste drainage system contributed to a larger portion of interstitial solutes clearance, such as amyloid beta (A ), preventing A deposition that was thought to be pathogenic in AD18,22.
		Unrelated	44	Prescribed medications	CAUSES	Chronic disease	https://www.ncbi.nlm.nih.gov/pmc/articles/PMC4698815/	In the light of new evidence on the use of commonly prescribed medications leading to chronic conditions [8] or having protective effect for certain chronic conditions [93], it is important to focus on the specific classes of medications and their impact on total healthcare costs.
		Related	45	Alzheimer's Disease	ASSOCIATED_WITH	Carbohydrate Metabolism	https://pubmed.ncbi.nlm.nih.gov/21368863/	Interestingly, in the cerebellum, a structure not affected by AD, we found an upregulation of proteins involved in carbohydrate metabolism and protein catabolism.
		Related	46	Alzheimer's Disease	ASSOCIATED_WITH	Phospholipid Metabolism	https://pubmed.ncbi.nlm.nih.gov/2812317/	We used in vivo phosphorus 31 nuclear magnetic resonance (31P NMR) spectroscopy to study regional high-energy phosphate and phospholipid metabolism in brains of patients with dementia associated with probable Alzheimer's disease (AD) and multiple subcortical cerebral infarctions (MSID).
		Related	47	Biochemical Pathway	COEXISTS_WITH	Alzheimer disease, familial, type 3	https://www.ncbi.nlm.nih.gov/pmc/articles/PMC9140721/	However, there were 15 pathways present only in AD-EMCI, significantly exceeding the number of exclusive pathways in the other two groups.
		Related	48	Alzheimer's Disease	ASSOCIATED_WITH	receptor function	https://pubmed.ncbi.nlm.nih.gov/11274373/	Because alpha7-nAChRs in the central nervous system are thought to have numerous functions and recently have been implicated in learning and memory, impaired receptor function in this case may contribute to cognitive deficits associated with Alzheimer's disease.
		Unrelated	49	sensitizing antigen	ASSOCIATED_WITH	Childhood asthma	https://www.ncbi.nlm.nih.gov/pmc/articles/PMC3597029/	In particular, there have been few reports involving exposure of neonatal or weanling animals to these environmental triggers in the context of exposure to a sensitizing antigen via the respiratory tract and ongoing antigenic challenge, which is the context in which childhood asthma develops.
		Unrelated	50	Antimetabolites	CAUSES	cardiac event	https://www.ncbi.nlm.nih.gov/pmc/articles/PMC8984624/	Other antimetabolites are reported to cause rare cardiac events, i.e., hypotension and chest pain with fludarabine [33], ischemia with cladribine and pentostatin [34,35], syncope, MI, and arrhythmia (supraventricular and ventricular tachycardia (i.e., SVT/VT) with methotrexate [36 38], and pericarditis with cytarabine [39].
		Related	51	Fas signaling pathway	COEXISTS_WITH	Alzheimer's Disease	https://pubmed.ncbi.nlm.nih.gov/16085017/	In conclusion, the findings of the present study indicate that, while the FADD apoptotic signaling pathway may be triggered within the basal forebrain cholinergic neurons in AD, the apoptotic cascade is most likely aborted as no DNA fragmentation was detected and the executioner caspase-3 was not up-regulated within these neurons.
		Unrelated	52	Lipopolysaccharides	CAUSES	HIV disease progression	https://www.ncbi.nlm.nih.gov/pmc/articles/PMC6222057/	Microbial translocation and circulating LPS are markers of HIV progression and are associated with the production of inflammatory mediators by monocytes, activation of T cells, and exacerbation of inflammation (39, 40).
		Unrelated	53	cobaltous cation	STIMULATES	SCLEROSING CHOLANGITIS, NEONATAL	https://www.ncbi.nlm.nih.gov/pmc/articles/PMC5431863/	The NSC amount at heading in the present study were increased by increased atmospheric CO2 concentrations in all tested genotypes (Tables 2).
		Related	54	Alzheimer Disease, Late Onset	ASSOCIATED_WITH	Insulin/Insulin Receptor Signaling Pathway	https://www.ncbi.nlm.nih.gov/pmc/articles/PMC6594890/	When associated with type II DM, dementia and LOAD are accompanied by defects in insulin-signaling within the CNS [10].
		Related	55	lithium	ASSOCIATED_WITH	DNA Fragmentation	https://www.ncbi.nlm.nih.gov/pmc/articles/PMC4446540/	Pretreatment with lithium attenuated PQ induced DNA fragmentation significantly (Figure 2B).
		Related	56	lithium	INHIBITS	Signal Transduction Pathways	https://pubmed.ncbi.nlm.nih.gov/10963797/	This study examined the hypothesis that lithium inhibits the PI signaling pathway in humans during in vivo administration by concurrently measuring PKC isozymes and platelet membrane phosphoinositides in lithium-treated patients and healthy individuals.
		Unrelated	57	Flavonoids	INHIBITS	cardiac event	https://www.ncbi.nlm.nih.gov/pmc/articles/PMC9081501/	Epidemiological investigations suggest that dietary intake of flavonoids could effectively reduce the risk of cardiac events (44, 45).
Quality score: 2 (does provide some detail mechanisms, but does not give any references to strengthen the statements. Also states that lithium inhibits APP catabolic process, which would lead to more APP and formation of amyloid beta peptides, one of the hallmarks of AD)		Unrelated	58	chorionic gonadotropin	ASSOCIATED_WITH	early pregnancy	https://www.ncbi.nlm.nih.gov/pmc/articles/PMC2038950/	Turner has also suggested that oestrogen exerts a benefi- cial and chorionic gonadotrophin an adverse effect on tuberculosis, and that the high level of circulating chorionic gonadotrophin is responsible for the aggravation of the disease and thus for the peak incidence in early pregnancy.
		Related	59	Alzheimer's Disease	ASSOCIATED_WITH	Lipid Metabolism	https://pubmed.ncbi.nlm.nih.gov/1946550/	Since we have shown elevated tin levels in patients with Alzheimer's disease, and since organic tin compounds given to animals produce a syndrome with similarities to Alzheimer's disease, there is a need for investigation of the role of tin in lipid metabolism in dementia.
Hypothesis (using no additional information)		Related	60	Alzheimer's Disease	ASSOCIATED_WITH	Wnt beta-Catenin Signaling Pathway	https://www.ncbi.nlm.nih.gov/pmc/articles/PMC6932873/	For example, down-regulation of canonical Wnt/beta-catenin pathway is associated with AD [23, 24].
Hypothesis: Lithium, a commonly used drug for bipolar disorder, may have therapeutic potential in the treatment of Alzheimer's disease due to its neuroprotective and anti-inflammatory properties. Alzheimer's disease is characterized by the accumulation of beta-amyloid plaques and tau tangles in the brain, leading to neuronal death and cognitive decline. Lithium has been shown to inhibit glycogen …		Unrelated	61	Glycoproteins	ASSOCIATED_WITH	Pelvic prolapse	https://pubmed.ncbi.nlm.nih.gov/18155129/	Relatively few data have been published with respect to the role of elastin and glycoproteins in pelvic organ prolapse (POP).
		Unrelated	62	Fetal fibronectin	ASSOCIATED_WITH	Vaginal mucositis	https://pubmed.ncbi.nlm.nih.gov/9273109/	The presence of fetal fibronectin in the cervico-vaginal mucus strongly suggest an eminent delivery within few days after sampling.
		Related	63	lithium	STIMULATES	adenylate cyclase activity	https://pubmed.ncbi.nlm.nih.gov/2983514/	It is suggested that lithium interferes with hormonal stimulation of adenylate cyclase activity by an interaction with the process regulating the transfer of the receptor-hormone stimulus to the adenylate cyclase enzyme.
		Related	64	lithium	STIMULATES	glycogenesis	https://pubmed.ncbi.nlm.nih.gov/6646115/	In contrast, lithium-stimulated glycogenesis was decreased but lithium-stimulated glucose oxidation and lipogenesis were completely blocked.
		Unrelated	65	Luteolin	ASSOCIATED_WITH	vascular inflammations	https://www.ncbi.nlm.nih.gov/pmc/articles/PMC4334457/	In addition, the effect of luteolin on proinflammatory mediator-induced vascular inflammation in vivo is largely unknown.
		Related	66	Alzheimer Disease, Late Onset	ASSOCIATED_WITH	Signal Transduction Pathways	https://www.ncbi.nlm.nih.gov/pmc/articles/PMC7279419/	Additionally, several signaling pathways associated with LOAD might modulate various processes, such as the reduction of amyloid- aggregation and inflammation, regulation of mitochondrial dynamics, and increased neuronal activity [10].
		Unrelated	67	New medications	TREATS	African Trypanosomiasis	https://pubmed.ncbi.nlm.nih.gov/702049/	An approach to the development of new drugs for African trypanosomiasis.
		Related	68	phosphatidylinositol metabolic process	COEXISTS_WITH	Alzheimer's Disease	https://pubmed.ncbi.nlm.nih.gov/8239311/	Aberrant phosphoinositide metabolism in Alzheimer's disease.
		Related	69	Protein Degradation, Metabolic	COEXISTS_WITH	Alzheimer's Disease	https://pubmed.ncbi.nlm.nih.gov/11908072/	Protein degradation in Alzheimer's disease and aging of the brain.
		Unrelated	70	amino acids 12 %	ASSOCIATED_WITH	Adenocarcinoma	https://pubmed.ncbi.nlm.nih.gov/9815896/	Studies focused on the aspartic acid substitution at amino acid position 12 (denoted D12), one of the most common mutations in colon adenocarcinoma.
		Related	71	Alzheimer's Disease	ASSOCIATED_WITH	nitric oxide mediated signal transduction	https://www.ncbi.nlm.nih.gov/pmc/articles/PMC3008726/	In addition to providing a mechanistic basis for the recognized deficiencies in NO/cGMP signaling associated with Alzheimer's disease pathogenesis, our data may have implications for peripheral vascular disease in light of the documented A accumulation in diseased peripheral as well as cerebral blood vessels.
		Related	72	lithium	ASSOCIATED_WITH	Carbohydrate Metabolism	https://pubmed.ncbi.nlm.nih.gov/4186966/	Effect of lithium on carbohydrate metabolism.
Quality score: 3 (provides logical inferences and some detail mechanisms, but does not give any references to strengthen the statements.)		Related	73	Alzheimer's Disease	ASSOCIATED_WITH	26S protease activity	https://www.ncbi.nlm.nih.gov/pmc/articles/PMC6411038/	Aggregated forms of misfolded tau are degraded in the autophagy-lysosomal system, while the accumulation of misfolded tau in CNS tissues of AD, and other tauopathies, is associated with lower 26S proteasome activity [39, 55, 69, 89].
		Related	74	Familial Alzheimer Disease (FAD)	COEXISTS_WITH	amyloid precursor protein catabolic process	https://www.ncbi.nlm.nih.gov/pmc/articles/PMC3030599/	The NTF and CTF of PS-1 form a heterodimer that is normally incorporated into a gamma-secretase complex whose aberrant function in some forms of familial Alzheimer's disease is implicated in aberrant APP cleavage and over-production of toxic A 42 or an increased ratio of A 42 to A 40 [25].
(Highlight in red: incorrect citations)		Unrelated	75	STEP 2	ASSOCIATED_WITH	Impulsive Behavior	https://www.ncbi.nlm.nih.gov/pmc/articles/PMC3672262/	In step 2, the four impulsivity factors, depressive symptoms, and alcohol use were added to the model, LR 2(13) = 628.21, p < .001, Cragg-Uhler R2 = .437.
		Unrelated	76	Levovist	STIMULATES	Neoplasms	https://pubmed.ncbi.nlm.nih.gov/12402985/	The tumor was enhanced clearly by Levovist, and the distance from the main pancreatic duct was more than 3 mm.
		Related	77	lithium	INHIBITS	Amyloid beta-Peptides	https://pubmed.ncbi.nlm.nih.gov/22631612/	The reduction of beta-gamma bursts by amyloid beta is blocked by inhibiting GSK-3 either with lithium or with SB 216763.
		Unrelated	78	methimazole	TREATS	hyperthyroid symptom	https://pubmed.ncbi.nlm.nih.gov/18846989/	It was not until thiamazole was given in combination with glucocorticosteroids, when a slow relief of hyperthyroidism symptoms and resolution of radiographic pulmonary signs were observed.
		Unrelated	79	Complement System Proteins	ASSOCIATED_WITH	tumor growth	https://pubmed.ncbi.nlm.nih.gov/354972/	Antibody and complement modulation of tumor cell growth in vitro and in vivo.
		Unrelated	80	PCB-126	STIMULATES	TELOMERE LENGTH, MEAN LEUKOCYTE	https://www.ncbi.nlm.nih.gov/pmc/articles/PMC6714427/	The same four variables selected by lasso (PCB 99 ( = 0.002), PCB 118 ( = 0.004), furan 2,3,4,7,8-pncdf ( = 0.02, i.e., a one standard deviation increase in PCB 126 is associated with a 0.01 unit increase in log-LTL), and PCB 126 ( = 0.01), plus furan 1,2,3,4,6,7,8 hxcdf ( = 0.0001).
		Related	81	Lipid Metabolism	COEXISTS_WITH	Alzheimer Disease 12	https://www.ncbi.nlm.nih.gov/pmc/articles/PMC5654999/	Pathway analysis predicted MAST4 association with FOXO1 (Fig. S2A), a stress responder important for lipid metabolism, which is dysregulated in AD12,13,21.
		Related	82	lithium	STIMULATES	cAMP-mediated signaling	https://www.ncbi.nlm.nih.gov/pmc/articles/PMC2917645/	Our working model is that treatment of flies with both lithium and antagonists of DmGluRA will increase cAMP signaling and may also decrease InsP3R mediated calcium release (Figure 3A).
		Related	83	lithium	INHIBITS	caspase-3 activity	https://www.ncbi.nlm.nih.gov/pmc/articles/PMC2760639/	Inhibition of GSK3 with lithium reduced staurosporine-induced caspase-3 activity in both wild-type and XIAP knockdown cells to a similar extent (Figure 8A).
		Related	84	Lipid Peroxidation	COEXISTS_WITH	Familial Alzheimer Disease (FAD)	https://www.ncbi.nlm.nih.gov/pmc/articles/PMC2834848/	Oxidative stress induced lipid peroxidation in AD and FAD disrupts cellular homeostasis (Butterfield and Lauderback, 2002; Lauderback et al., 2001), such as loss of membrane asymmetry (Bader Lange et al., 2008; Castegna et al., 2004; Mohmmad Abdul and Butterfield, 2005).
		Unrelated	85	antibody conjugate	ASSOCIATED_WITH	Lymphoma	https://pubmed.ncbi.nlm.nih.gov/21283093/	Trial watch: antibody-drug conjugate shows efficacy in lymphoma.
		Unrelated	86	Basis	TREATS	Huntington Disease	https://pubmed.ncbi.nlm.nih.gov/15916486/	Since hairpin small interference RNA (shRNA) technology allows inhibition of specific gene expression in vitro and in vivo, vector-mediated expression of an shRNA directed to htt mRNA could form the basis of a new treatment modality for HD.
		Unrelated	87	Neuraminidase inhibitors, direct acting antivirals	TREATS	Influenza in Birds	https://pubmed.ncbi.nlm.nih.gov/17577050/	Although neuraminidase inhibitors are effective in treating avian influenza, especially if given within 48 h of infection, it is harder to prevent the resultant hypercytokinaemia from developing if the patient does not seek timely medical assistance.
		Unrelated	88	interleukin-8	ASSOCIATED_WITH	tuberculous effusion	https://www.ncbi.nlm.nih.gov/pmc/articles/PMC4531991/	While IL-8 was also expected to be elevated in tuberculous effusion, as it is induced by lipoarabinomannan of tuberculous bacilli14), there was no significant difference between tuberculous and malignant effusion in the present result.
		Related	89	Oxidation-Reduction	COEXISTS_WITH	Alzheimer's Disease	https://pubmed.ncbi.nlm.nih.gov/11290407/	Changes in thiol content and expression of glutathione redox system genes in the hippocampus and cerebellum in Alzheimer's disease.
		Unrelated	90	prohibitin	ASSOCIATED_WITH	Dermatophytosis	https://pubmed.ncbi.nlm.nih.gov/4417409/	[PHB--a new drug of significant antifungal activity in dermatophytosis].
		Unrelated	91	New medications	TREATS	Pneumococcal Infections	https://pubmed.ncbi.nlm.nih.gov/17229144/	Therefore, it is desirable to find targets for the development of new antimicrobial drugs specifically designed to fight pneumococcal infections.
		Related	92	Amyloid beta-Peptides	COMPLICATES	Alzheimer's Disease	https://www.ncbi.nlm.nih.gov/pmc/articles/PMC7388140/	Elevated cortisol levels and HPA axis dysfunction are implicated in chronic stress, which releases amyloid beta (A ) that causes and/or worsens AD (109).
		Related	93	lithium	STIMULATES	Fas signaling pathway	https://www.ncbi.nlm.nih.gov/pmc/articles/PMC3217194/	This study revealed that apoptosis induced by the extrinsic pathway, specifically by Fas receptor signaling, was enhanced by lithium and other GSK-3 inhibitors (Song et al., 2004).
		Unrelated	94	Leukocyte Adhesion Molecules	ASSOCIATED_WITH	vascular inflammations	https://pubmed.ncbi.nlm.nih.gov/11304501/	Angiotensin II is a potent mediator of oxidative stress and stimulates the release of cytokines and the expression of leukocyte adhesion molecules that mediate vessel wall inflammation.
		Unrelated	95	Fibroblast Growth Factor	ASSOCIATED_WITH	SCLEROSING CHOLANGITIS, NEONATAL	https://www.ncbi.nlm.nih.gov/pmc/articles/PMC3895023/	In the embryonic mouse telencephalon FGF-responsive multi-potential, self-renewing NSCs emerge before EGF-responsive NSCs and distinct populations proliferate in response to these mitogens [18].
		Related	96	lithium	INHIBITS	Caspase Activation	https://pubmed.ncbi.nlm.nih.gov/11432986/	Lithium inhibits caspase 3 activation and dephosphorylation of PKB and GSK3 induced by K+ deprivation in cerebellar granule cells.
		Unrelated	97	nitrogen	CAUSES	pulmonary edema interstitial	https://www.ncbi.nlm.nih.gov/pmc/articles/PMC8989823/	In all these conditions, the poorly soluble NO2 gas, heavier than air, penetrates the peripheral airways and alveoli and generates toxic nitrous and nitric acid after combining with water, thereby increasing cell membrane permeability resulting in interstitial pulmonary edema (Brat K, 2013), easily detectable as B-lines.
		Related	98	lithium	ASSOCIATED_WITH	cyclic nucleotide-gated mechanosensitive ion channel activity	https://www.ncbi.nlm.nih.gov/pmc/articles/PMC8931491/	Galli et al. noted that the differentiation of bone marrow MSCs on the titanium was improved by the Li addition on coating via the wnt/ -catenin signal.
		Related	99	lithium	ASSOCIATED_WITH	Proteolysis	https://www.ncbi.nlm.nih.gov/pmc/articles/PMC3602924/	Lithium also decreased the dexamethasone-induced increase in proteolysis in L6 myotubes (11).
		Unrelated	100	Interleukin-1	STIMULATES	tumor growth	https://pubmed.ncbi.nlm.nih.gov/8043388/	In this model, tumours appeared within 12-14 days, and IL-1 and IL-6 stimulated tumour growth in vivo.

## Sheet: Rasagiline Mesylate
Hypothesis (using supporting sentences)		(Un)Related	Ref	Subject Entity Name	Relation type	Object Entity Name	URL	Sentence
Based on the available evidence, it can be hypothesized that rasagiline mesylate may exert a therapeutic effect on Alzheimer's disease (AD) through several potential mechanisms. Firstly, rasagiline mesylate may mitigate the neurotoxic effects of beta-amyloid, a key pathological hallmark of AD [66,54,8,81,74,95,38,48,2,30,22,6,83,71,41]. This could be achieved by reducing the production or aggrega…		Unrelated	1	Prescribed medications	TREATS	Chronic heart failure	https://www.ncbi.nlm.nih.gov/pmc/articles/PMC4218698/	Digoxin is one of the most commonly prescribed drugs for the treatment of CHF but, as a substantial fraction of the absorbed dose is cleared by the kidneys, its toxicity is often the result of an impaired renal function (1).
		Related	2	Amyloid beta-Peptides	ASSOCIATED_WITH	Alzheimer Disease 9	https://www.ncbi.nlm.nih.gov/pmc/articles/PMC3622466/	Cognition and its decline associated with brain aging also seems to be variable and possibly open to modifications.1 Studies in humans and animal models suggest that age-related cognitive decline is more likely to be associated with alterations in synaptic connectivity than with neuronal loss and white matter changes.6,7 According to recent studies, alterations of intracellular -secretase mediate…
		Unrelated	3	Basis	INHIBITS	Malignant neoplasm of endometrium	https://www.ncbi.nlm.nih.gov/pmc/articles/PMC5796297/	Therefore, understanding the mechanism of invasion and metastasis in endometrial carcinoma may provide the basis for molecular therapy to inhibit progression of endometrial cancer and enable the discovery of novel ways to treat and prevent cancer metastasis.
		Related	4	tau Proteins	STIMULATES	Alzheimer's Disease	https://pubmed.ncbi.nlm.nih.gov/9147408/	Dependence of cerebrospinal fluid Tau protein levels on apolipoprotein E4 allele frequency in patients with Alzheimer's disease.
		Unrelated	5	ferric cation	ASSOCIATED_WITH	tumor vasculature	https://www.ncbi.nlm.nih.gov/pmc/articles/PMC4600027/	Taken together, these data indicated that untargeted Lip(Gd/Fe) provide for a better accumulation in, or slower clearance from, tumor than did similar liposomes targeted to VEGFRs on endothelial cells in the tumor vasculature.
		Related	6	Amyloid beta-Peptides	TREATS	Alzheimer's Disease	https://pubmed.ncbi.nlm.nih.gov/17105434/	The biology, structure and physiological properties of beta-amyloid peptide and related proteases (secretases) are discussed, as well as existing therapeutics and future strategies for the treatment of Alzheimer's disease.
		Unrelated	7	carboplatin	TREATS	Stage III Lung Cancer	https://www.ncbi.nlm.nih.gov/pmc/articles/PMC3155243/	Antitumor activity was also observed in a recent phase I trial of neoadjuvant carboplatin, paclitaxel and bortezomib combination with concurrent radiotherapy in Stage III lung cancer, where complete pathologic complete responses were noted, but trial was terminated due to delayed, unpredictable and severe toxicities (40).
		Related	8	Amyloid beta-Peptides	CAUSES	ALZHEIMER DISEASE 5	https://www.ncbi.nlm.nih.gov/pmc/articles/PMC6946617/	The deposition of beta-amyloid is an initial step in the pathogenesis of AD.5 However, the exact role of amyloid deposition and neurofibrillary tangle formation in MCI has not been studied extensively.
		Unrelated	9	Nerve Growth Factors	CAUSES	temporal pain	https://www.ncbi.nlm.nih.gov/pmc/articles/PMC8328992/	(3) The increase in temporal summation pain and chewing-evoked pain induced by NGF and glutamate is positively correlated with the expression of NR2B by putative sensory nerve fibers; and (4) peak glutamate-induced pain intensity is positively correlated with expression of NR2B by putative sensory nerve fibers in NGF-sensitized masseter muscle.
		Related	10	rasagiline mesylate	INHIBITS	Stress	https://pubmed.ncbi.nlm.nih.gov/24048951/	Study of stress degradation behavior of rasagiline mesylate under hydrolytic conditions by high performance liquid chromatography.
		Unrelated	11	indocyanine green	CAUSES	tumor growth	https://pubmed.ncbi.nlm.nih.gov/34689763/	Following nanocarrier uptake, ICG is heated by near-infrared (NIR) irradiation to make LM undergo a phase transition to release DOX and generate a synergistic effect of thermochemotherapy which kills tumor cells and inhibits tumor growth together with reactive oxygen species (ROS) produced by ICG.
		Unrelated	12	chemical cofactor	CAUSES	Precancerous lesion	https://pubmed.ncbi.nlm.nih.gov/17214350/	CONCLUSION: The presence of a high Ureaplasma urealyticum level seems to be a cofactor of HPV infection, a necessary cause of precancerous lesions of the uterine cervix.
		Related	13	Microhemorrhage	COEXISTS_WITH	Alzheimer's Disease	https://pubmed.ncbi.nlm.nih.gov/21392891/	CAA and cerebral microhemorrhages in AD have similar spatial distribution of lobar predominance, and their accumulation similarly affect cognitive function.
		Unrelated	14	flavanoid	INHIBITS	Malignant Neoplasms	https://www.ncbi.nlm.nih.gov/pmc/articles/PMC1082891/	Quercetin, a flavanoid prominent in onions and apples, has been epidemiologically associated with protection from coronary artery disease and cancer [13, 14] and is now available over the counter in 300 500 mg dose forms, with daily doses of up to 1500 mg.
		Unrelated	15	Vaccines, Conjugate	INHIBITS	tumor growth	https://www.ncbi.nlm.nih.gov/pmc/articles/PMC8210616/	The CBP-12 conjugated peptide vaccines significantly inhibited tumor growth, in the absence of an adjuvant, in anti-PD-1-responsive and -resistant tumor models.
		Related	16	Amyloid beta-Peptides	ASSOCIATED_WITH	Alzheimer Disease 12	https://www.ncbi.nlm.nih.gov/pmc/articles/PMC2773287/	It is hypothesized that high concentrations of glutamate cause an excess calcium influx through the ion channel that leads to excitotoxicity.10 It has been shown in AD patients that glutamate transporters in glial cells are reduced, while the presence of beta amyloid indirectly stimulates excessive glutamate production.11 This phenomenon is thought to contribute to the neurotoxicity of beta amylo…
		Unrelated	17	gnetin C	INHIBITS	tumor growth	https://www.ncbi.nlm.nih.gov/pmc/articles/PMC4674003/	Apoptosis assay was performed to determine whether MSE or GC inhibits tumor cell growth by inducing apoptosis.
		Related	18	Amyloid beta-Peptides	ASSOCIATED_WITH	Alzheimer Disease 11	https://www.ncbi.nlm.nih.gov/pmc/articles/PMC4040417/	Impaired mitochondrial protein import due to the amyloid beta peptide (A ) has been observed in Alzheimer s disease (AD)11, suggesting that mutant htt may cause a similar dysfunction in yeast.
Quality score: 4 (gives quite a bit of detailed mechanisms and makes good logical inferences)		Related	19	Neuroprotection	COEXISTS_WITH	Familial Alzheimer Disease (FAD)	https://pubmed.ncbi.nlm.nih.gov/11572959/	Loss of this neuroprotection after HO inhibition by mutant forms of amyloid precursor protein may mediate neurotoxicity in Familial Alzheimer's Disease.
		Unrelated	20	potassium hydroxide	STIMULATES	PREMATURE CHROMATID SEPARATION TRAIT	https://pubmed.ncbi.nlm.nih.gov/28782857/	Significantly, PCs have been further activated by KOH to obtain activated carbon materials (APCs), which possess even higher specific surface area and larger porosity.
Hypothesis (using supporting sentences and unrelated sentences)		Unrelated	21	acriflavine	INHIBITS	tumor growth	https://www.ncbi.nlm.nih.gov/pmc/articles/PMC3366472/	Another HIF-1 inhibitor, acriflavine, was found to inhibit tumor growth and angiogenesis in a xenograft tumor model for human prostate cancer through blockage of HIF-1 dimerization (Lee et al., 2009).
Based on the available evidence, we hypothesize that rasagiline mesylate may exert a therapeutic effect on Alzheimer's disease (AD) through multiple mechanisms. Firstly, rasagiline mesylate may inhibit the aggregation and misfolding of amyloid-beta (Aβ), a process implicated in the pathogenesis of AD [48, 74, 81, 95]. This could potentially reduce the formation of neurotoxic Aβ oligomers and fibr…		Related	22	tau Proteins	ASSOCIATED_WITH	Familial Alzheimer Disease (FAD)	https://pubmed.ncbi.nlm.nih.gov/19782073/	In this work, we review the links between beta amyloid peptide, tau protein and GSK3 that occur in familial Alzheimer disease.
		Unrelated	23	Therapeutic agent (substance)	TREATS	end organ damage	https://pubmed.ncbi.nlm.nih.gov/16481886/	NADPH oxidase, the primary source of reactive oxygen species in the cardiovascular system, is a strong candidate for the development of therapeutic agents to ameliorate hypertension and end-organ damage.
		Related	24	Amyloid beta-Peptides	ASSOCIATED_WITH	ALZHEIMER DISEASE 18	https://www.ncbi.nlm.nih.gov/pmc/articles/PMC7864928/	Considering the potential functions of the PVS system, studies had proved that the PVS waste drainage system contributed to a larger portion of interstitial solutes clearance, such as amyloid beta (A ), preventing A deposition that was thought to be pathogenic in AD18,22.
		Related	25	Alzheimer's Disease	CAUSES	Stress	https://pubmed.ncbi.nlm.nih.gov/7566347/	The possibility that some of the NFT-associated elements may play an active role in the pathogenesis of Alzheimer's disease was supported by recent studies, in which advanced glycated products and markers of oxidant stress were located in NFT.
		Unrelated	26	lipid mediator	ASSOCIATED_WITH	Paracoccidioidomycosis	https://www.ncbi.nlm.nih.gov/pmc/articles/PMC4618125/	The influence of lipid mediators from the AA metabolism was scarcely studied in paracoccidioidomycosis.
		Unrelated	27	Opioids	CAUSES	tumor growth	https://pubmed.ncbi.nlm.nih.gov/22433205/	BACKGROUND: Preclinical studies suggest that opioids may promote tumor growth.
		Unrelated	28	Adrenocortical hormones	CAUSES	Avascular necrosis of bone	https://pubmed.ncbi.nlm.nih.gov/7128299/	[Ischemic necrosis of the femoral head caused by adrenocortical hormones--report of 3 cases].
		Related	29	Alzheimer's Disease	INHIBITS	Neuroprotection	https://pubmed.ncbi.nlm.nih.gov/19717566/	Because inheritance of the apoE4 allele is the strongest known genetic risk factor for Alzheimer disease, the reduced neuroprotection afforded by apoE4-containing LpE might contribute to the neurodegeneration characteristic of this disease.
		Related	30	Amyloid beta-Peptides	ASSOCIATED_WITH	Alzheimer Disease, Early Onset	https://pubmed.ncbi.nlm.nih.gov/7998778/	Amyloid beta protein levels in cerebrospinal fluid are elevated in early-onset Alzheimer's disease.
		Related	31	Amyloid beta-Peptides	ASSOCIATED_WITH	Alzheimer's Disease	https://pubmed.ncbi.nlm.nih.gov/3555492/	The mouse homolog of the human amyloid beta protein (AD-AP) gene is located on the distal end of mouse chromosome 16: further extension of the homology between human chromosome 21 and mouse chromosome 16.
		Related	32	Alzheimer's Disease	ASSOCIATED_WITH	Stress	https://pubmed.ncbi.nlm.nih.gov/3958412/	These considerations prompt future research on the effect of stress hormones on brain cells, in particular the hippocampus, affected by Alzheimer's disease.
		Unrelated	33	Anti-Arrhythmia Agents	STIMULATES	cardiac event	https://pubmed.ncbi.nlm.nih.gov/10884976/	Nitrates (6.0% vs 3.1%, p < 0.01) and antiarrhythmic agents (13.7% vs 3.6%, p < 0.01) increased the incidence of cardiac events.
		Related	34	Amyloid beta-Peptides	ASSOCIATED_WITH	Alzheimer Disease, Late Onset	https://pubmed.ncbi.nlm.nih.gov/14692704/	The present study was carried out to examine the coincidence of these small vessel pathologies during the development of cognitive deficits, amyloid beta-protein (A beta) deposition, and neurofibrillary tangle (NFT) formation in sporadic late-onset AD.
		Unrelated	35	Anti-Inflammatory Agents, Non-Steroidal	TREATS	AIDS defining illness	https://www.ncbi.nlm.nih.gov/pmc/articles/PMC4429073/	Seven of the cases (44%) with lymph node TB-IRIS required surgical drainage or aspiration of the abscess and non-steroidal anti-inflammatory drugs to alleviate their symptoms.AIDS defining illnesses (ADIs)There were 39 ADIs documented.
		Unrelated	36	Cisplatin liposome	INHIBITS	tumor growth	https://www.ncbi.nlm.nih.gov/pmc/articles/PMC4362523/	Schroeder et al (2009[a]) reported that insonation of a colon adenocarcinoma implanted in the feet of mice following the intravenous injection of cisplatin loaded liposomes inhibited tumor growth and the tumors regressed over time.
		Related	37	Stress	COMPLICATES	Alzheimer's Disease	https://www.ncbi.nlm.nih.gov/pmc/articles/PMC5733004/	Chronic stress has been shown to release more A , trigger and worsen AD severity (Morgese et al., 2017).
		Related	38	Amyloid beta-Peptides	ASSOCIATED_WITH	Alzheimer disease, familial, type 3	https://www.ncbi.nlm.nih.gov/pmc/articles/PMC8476544/	Although the physiological relevance of the fragments generated is not fully understood, one of these, the amyloid-beta peptide (A ) originating from the transmembrane domain of the APP protein, is the main component of brain amyloid plaques in Alzheimer s disease (AD)3,4.
		Related	39	Stress	CAUSES	Alzheimer's Disease	https://pubmed.ncbi.nlm.nih.gov/8710189/	Stress has been identified as a putative risk factor of AD.
		Unrelated	40	Antithrombotic Agents	TREATS	Early gastric cancer	https://www.ncbi.nlm.nih.gov/pmc/articles/PMC5292875/	In very elderly patients, differences in overall survival rates due to other comorbidities, use of antithrombotic agents, and gender were not significant.DiscussionESD is currently used for EGC with a negligible risk of lymph node metastasis and enables en bloc resection of tumors.
Quality score: 3 (gives some detail mechanisms and makes some logical inferences)		Related	41	Amyloid beta-Peptides	INHIBITS	Alzheimer's Disease	https://pubmed.ncbi.nlm.nih.gov/19723623/	Therefore, the inhibitory effect of PEDF appears to be mediated via the processing of VEGF-R2 by gamma-secretase. gamma-Secretase generates the amyloid-beta (Abeta) peptide of Alzheimer disease from its precursor (amyloid precursor protein).
		Unrelated	42	Marihuana	STIMULATES	psychosocial impairment	https://www.ncbi.nlm.nih.gov/pmc/articles/PMC9057648/	This might not be unconnected with the fact that early initiation and continuous use of cannabis in adolescents increase psychosocial impairment and problematic cannabis use, and also increase vulnerability to developing psychotic disorders.20-24 Early initiation of cannabis use has been reported as a risk factor for developing psychosis.24,25 This may explain the relatively high proportions of p…
Hypothesis (using relations and unrelated relations)		Unrelated	43	delphinidin	CAUSES	tumor growth	https://www.ncbi.nlm.nih.gov/pmc/articles/PMC4687871/	Although delphinidin (10 g/ml) did not inhibit in vitro B16-F10 proliferation, it might nevertheless partially explain the decrease of B16F10 tumor growth induced by delphinidin in vivo, since PDE1 inhibition per se reduces B16F10 melanoma cell proliferation [41].
Based on the evidence provided, it can be hypothesized that rasagiline mesylate may have potential therapeutic effects in the treatment of Alzheimer's disease. This hypothesis is primarily supported by the evidence that rasagiline mesylate inhibits stress [10] and stimulates neuroprotection [78]. Alzheimer's disease is known to be associated with stress [32, 37, 39, 59, 64, 65, 68, 82, 86, 87] an…		Unrelated	44	Steroids	CAUSES	vascular inflammations	https://www.ncbi.nlm.nih.gov/pmc/articles/PMC8424492/	Furthermore, approximately 50% of patients on corticosteroids continue to worsen clinically (vision loss, stroke) or have recurrent disease when steroids are tapered.43 The addition of an antiviral agent that would treat the underlying cause of vascular inflammation may improve patient outcomes, thus warranting multicenter clinical trials to determine antiviral drug dose and duration, as well as …
		Related	45	Amyloid beta-Peptides	COMPLICATES	Alzheimer's Disease	https://www.ncbi.nlm.nih.gov/pmc/articles/PMC7388140/	Elevated cortisol levels and HPA axis dysfunction are implicated in chronic stress, which releases amyloid beta (A ) that causes and/or worsens AD (109).
		Unrelated	46	AVE1642	INHIBITS	tumor growth	https://www.ncbi.nlm.nih.gov/pmc/articles/PMC2720270/	Sequential treatment of doxorubicin followed by a low dose of AVE1642 significantly inhibited xenograft tumor growth and metastasis Our in vitro data suggest that blockade of IGF1R after doxorubicin was the most effective combination.
		Unrelated	47	Iron Powder	TREATS	Alopecia	https://www.ncbi.nlm.nih.gov/pmc/articles/PMC7353323/	Around 3500 B.C. ancient Egyptians used iron powder for baldness [12], which is now more elegantly named non-scarring alopecia.
		Related	48	Amyloid beta-Peptides	ASSOCIATED_WITH	Alzheimer Disease 7	https://www.ncbi.nlm.nih.gov/pmc/articles/PMC7989959/	Aggregation and misfolding of amyloid-beta (A ) is a potential mechanism in AD patients.7 A monomers assemble into A O (A oligomers) and fibrils and are then distributed into the circulating blood or cerebrospinal fluid (CSF).1 The A O is neurotoxic and is highly correlated with severe AD.
		Related	49	tau Proteins	CAUSES	Alzheimer's Disease	https://pubmed.ncbi.nlm.nih.gov/1527090/	It has been suggested that hyperphosphorylation of the tau protein in neurofibrillary tangles may be relevant to the etiology of Alzheimer's disease and that at least one of the hyperphosphorylated sites lies within a consensus sequence for the p34cdc2/cdc28 family of kinases.
		Unrelated	50	Antibodies, Neutralizing	INHIBITS	OSTEOLYTIC BONE LESION	https://pubmed.ncbi.nlm.nih.gov/12548583/	Neutralizing antibodies to PTHrP, which inhibit PTHrP effects on osteoclastic bone resorption, also reduce osteolytic bone lesions and tumor burden in bone.
		Unrelated	51	Bos taurus eye preparation	CAUSES	Ocular Hypertension	https://www.ncbi.nlm.nih.gov/pmc/articles/PMC7414733/	Bovine eyes are commonly used in the study of conventional outflow biology.53,54 For example, glucocorticoid treatment of bovine eyes induces ECM accumulation in the TM region containing AAP and causes ocular hypertension, similar to that seen in human eyes.55 Additionally, bovine TM cells have been a reliable and translatable model to human TM cells.56,57 However, the isolation of bovine AAP cel…
		Unrelated	52	Anti-DR4	ASSOCIATED_WITH	Malignant Neoplasms	https://www.ncbi.nlm.nih.gov/pmc/articles/PMC8636823/	As a matter of fact, Phase I clinical studies have established the safety and tolerability of recombinant human TRAIL (rhTRAIL) or the agonistic monoclonal anti-DR4 or anti-DR5 antibody in human cancer.
		Unrelated	53	acetyl propionyl	ASSOCIATED_WITH	Bronchiolitis Obliterans	https://www.ncbi.nlm.nih.gov/pmc/articles/PMC7272070/	Diacetyl and acetyl propionyl, which produce buttery or creamy flavors, have received attention for associations with bronchiolitis obliterans (i.e., popcorn lung ) among microwave popcorn industry workers [117, 118] and have been investigated in e-liquid flavoring [82, 92].
		Related	54	Alzheimer's Disease	PRODUCES	tau Proteins	https://pubmed.ncbi.nlm.nih.gov/24059239/	The two molecular hallmarks of AD are amyloid plaques created from an amyloid precursor protein and hyperphosphorylated tau protein that is deposited as neurofibrillary tangles inside neurons.
		Unrelated	55	Aversion	ASSOCIATED_WITH	Tobacco Dependence	https://www.ncbi.nlm.nih.gov/pmc/articles/PMC3858456/	Emerging data from genome-wide association studies (GWAS) are identifying polymorphisms that increase vulnerability to tobacco dependence in humans, and also support the notion that sensitivity to nicotine aversion may be influenced by genetics.
		Unrelated	56	Tobacco	CAUSES	insanity	https://www.ncbi.nlm.nih.gov/pmc/articles/PMC5086213/	Who has not experienced or observed this deleterious influence, producing depression of spirits, dejection, taciturnity, and inability to contend with the cares of life; gloom, despondency, and perhaps a disposition to self-destruction, or actual insanity in the form of melancholia 1 How little or how much soever tobacco may act, either imme- diately or remotely, as a generative cause of insanity…
Quality score: 2 (few detail mechanisms, though no mechanisms mentioned on the effect of rasagiline on tau proteins or amyloid beta-peptides. Some logical inferences but no evidence to support statements)		Unrelated	57	deoxycholic acid	ASSOCIATED_WITH	tumor growth	https://www.ncbi.nlm.nih.gov/pmc/articles/PMC7314665/	The results of proliferation assays showed that DCA treatment remarkably inhibited proliferation of both NOZ and GBC-SD cells (Fig. 2b), indicating the potential suppressive effect of DCA on GBC tumor cell growth.
		Unrelated	58	Immunomodulating Agents	TREATS	Metastatic Renal Cell Cancer	https://www.ncbi.nlm.nih.gov/pmc/articles/PMC7808104/	In the future, extensive biomarker research together with testing of triplet and quadruplet combinations of immunomodulatory drugs may bring another dimension to the treatment of mRCC.
Hypothesis (using no additional information)		Related	59	Stress	COEXISTS_WITH	Alzheimer Disease, Late Onset	https://www.ncbi.nlm.nih.gov/pmc/articles/PMC4742105/	For instance, LPS is used to induce cognitive impairment in mice [120, 133].LPS induces stress and depression in late onset AD [134].Neuro-inflammation, amyloidogenesis and memory impairment in a mouse model is seen following the systemic inflammation generated by LPS [120].
The potential therapeutic effect of rasagiline mesylate in Alzheimer's disease could be hypothesized based on its known mechanism of action as a monoamine oxidase-B (MAO-B) inhibitor. In Alzheimer's disease, there is an accumulation of beta-amyloid plaques and tau protein tangles in the brain, leading to neuronal death and cognitive decline. Rasagiline mesylate, by inhibiting MAO-B, may reduce th…		Related	60	Alzheimer's Disease	MANIFESTATION_OF	Neuroprotection	https://pubmed.ncbi.nlm.nih.gov/22305647/	The aim of this paper is to present various well-known dietary polyphenols and their mechanisms of neuroprotection with an emphasis on Alzheimer's disease, Parkinson's disease, and amyotrophic lateralsclerosis.
		Unrelated	61	OK-432	TREATS	Malignant pleurisy	https://pubmed.ncbi.nlm.nih.gov/7647401/	We investigated the changes in cellular components and neutrophil chemotactic factors in pleural fluid from 19 lung cancer patients who received intrapleural injection of OK-432 to treat malignant pleurisy.
		Unrelated	62	Anticoagulants	TREATS	EMBOLISM, SYSTEMIC ARTERIAL	https://pubmed.ncbi.nlm.nih.gov/13517565/	A critical appraisal of anticoagulants for short-term and longterm use in the management of myocardial infarction and systemic arterial embolism.
		Related	63	Neuroprotection	ASSOCIATED_WITH	Alzheimer's Disease	https://pubmed.ncbi.nlm.nih.gov/11193809/	Estrogens and non-feminizing estrogen-like compounds may exert their beneficial effects in AD through a variety of mechanisms, directly through their neuroprotective actions and indirectly through their neurotrophic effects.
		Related	64	Stress	COEXISTS_WITH	Familial Alzheimer Disease (FAD)	https://pubmed.ncbi.nlm.nih.gov/20161760/	CONCLUSIONS/SIGNIFICANCE: ER stress represses gamma-secretase mediated APP proteolysis, which replicates some of the proteolytic deficits associated with the FAD mutations.
		Related	65	Stress	COEXISTS_WITH	Alzheimer Disease 11	https://www.ncbi.nlm.nih.gov/pmc/articles/PMC7705771/	Heart-type fatty acid-binding protein (hFABP), a protein associated with myocardial ischemia, has been proposed as a vascular marker in AD.113 CSF hFABP levels are increased in AD and vascular dementia, and individuals with MCI who convert to AD dementia compared to controls or individuals with MCI who remain stable.149 In combination with other markers, CSF hFABP may improve the discrimination o…
		Related	66	Amyloid beta-Peptides	ASSOCIATED_WITH	Familial Alzheimer Disease (FAD)	https://pubmed.ncbi.nlm.nih.gov/1465129/	Mutation of the beta-amyloid precursor protein in familial Alzheimer's disease increases beta-protein production.
		Unrelated	67	trophoblast protein 1	ASSOCIATED_WITH	early pregnancy	https://pubmed.ncbi.nlm.nih.gov/469859/	Trophoblastin, an antiluteolytic protein present in early pregnancy in sheep.
		Related	68	Stress	COEXISTS_WITH	Alzheimer disease, familial, type 3	https://www.ncbi.nlm.nih.gov/pmc/articles/PMC5387861/	Although they reported mild but statistically significantly decreased IMT compared to healthy controls, the CWS was significantly increased in AD-HIES.
		Unrelated	69	INOTUZUMAB	TREATS	Common Acute Lymphoblastic Leukemia	https://pubmed.ncbi.nlm.nih.gov/35615334/	We describe the clinical history of a 40-year-old male with relapsed B-common ALL who developed Sars-CoV2 prior to treatment initiation with inotuzumab.
		Related	70	tau Proteins	INHIBITS	Alzheimer's Disease	https://pubmed.ncbi.nlm.nih.gov/17721707/	Furthermore, total tau protein levels were slightly decreased in both FTLD and AD as compared to control subjects.
Quality score: 2 (few detail mechanisms, some logical inferences but no evidence to support statements)		Related	71	Amyloid beta-Peptides	CAUSES	Alzheimer Disease, Early Onset	https://pubmed.ncbi.nlm.nih.gov/10230703/	Genetic studies on some families have shown that mutations in the genes encoding beta-amyloid precursor protein and presenilins 1 and 2 are responsible for early-onset AD.
		Unrelated	72	VEGF protein, human	ASSOCIATED_WITH	cancer angiogenesis	https://pubmed.ncbi.nlm.nih.gov/17116616/	Regulated by hypoxia-induced factor, both vascular endothelial growth factor (VEGF) and basic fibroblast growth factor (bFGF) are responsive to cancer-related angiogenesis.
(Highlight in red: incorrect citations)		Unrelated	73	analog drug	TREATS	Multiple Sclerosis	https://www.ncbi.nlm.nih.gov/pmc/articles/PMC4491676/	FTY720 is a sphingosine analog drug and a potent immunosuppressant that has been approved by the FDA as a treatment for multiple sclerosis (MS) after a series of successful clinical trials [89,90,91,92,93].
		Related	74	Amyloid beta-Peptides	CAUSES	Alzheimer's Disease	https://pubmed.ncbi.nlm.nih.gov/2907602/	It is thus very tempting to speculate that a defect (or defects) of the amyloid beta protein gene is the cause of Alzheimer's disease.
		Unrelated	75	AGI-5198	CAUSES	tumor growth	https://www.ncbi.nlm.nih.gov/pmc/articles/PMC7440756/	The stimulatory effect of AGI-5198 on 3D growth prompted us to ask whether AGI-5198 could induce tumor growth in the presence of GLUD2 shRNA.
		Unrelated	76	Fenretinide	INHIBITS	tumor growth	https://pubmed.ncbi.nlm.nih.gov/12606763/	Tumor growth inhibition by 4HPR was also associated with significant inhibition of angiogenesis in vivo.
		Unrelated	77	New medications	TREATS	Clostridium difficile colitis	https://www.ncbi.nlm.nih.gov/pmc/articles/PMC5139813/	(Table 2) Fidaxomicin is a promising new drug for the treatment of C difficile colitis which has many advantages over metronidazole and vancomycin.
		Related	78	rasagiline mesylate	STIMULATES	Neuroprotection	https://pubmed.ncbi.nlm.nih.gov/22985602/	Controlled release of rasagiline mesylate promotes neuroprotection in a rotenone-induced advanced model of Parkinson's disease.
		Related	79	Amyloid beta-Peptides	CAUSES	Alzheimer Disease 7	https://www.ncbi.nlm.nih.gov/pmc/articles/PMC2723955/	The techniques were applied to the detection of amyloid-beta derived diffusible ligands (ADDLs) which play an important role in the molecular pathogenesis of Alzheimer s Disease.7
		Unrelated	80	Restasis	TREATS	eyes dry chronic	https://pubmed.ncbi.nlm.nih.gov/17953324/	Restasis use in the chronic dry eye patient.
		Related	81	Amyloid beta-Peptides	CAUSES	Familial Alzheimer Disease (FAD)	https://pubmed.ncbi.nlm.nih.gov/9562460/	The significance of amyloid beta protein, especially those ending at the 42nd residue (Abeta42), in the pathogenesis of familial Alzheimer's disease (FAD) linked to the mutations of presenilins, was examined by transfection studies using cultured cells and immunohistochemical analysis of autopsied brains.
		Related	82	Alzheimer disease, familial, type 3	ASSOCIATED_WITH	Stress	https://www.ncbi.nlm.nih.gov/pmc/articles/PMC8720296/	Stress and increased stress hormone (e.g., cortisol) levels have been associated with cognitive impairment and AD.[62] Changes in stress hormone signaling have been found in AD patients.
		Related	83	Amyloid beta-Peptides	CAUSES	Alzheimer Disease, Late Onset	https://www.ncbi.nlm.nih.gov/pmc/articles/PMC4045094/	In this study, we investigate the influence of interactions between genes previously associated with Alzheimer s Disease (AD) on amyloid-beta (A ) load in an effort to better understand the genetic etiology of A deposition and, by extension, risk for LOAD.
		Unrelated	84	bleomycin	CAUSES	PULMONARY PROCESS	https://pubmed.ncbi.nlm.nih.gov/8641658/	Inhibitory effects of the dietary antioxidants butylated hydroxyanisole and butylated hydroxytoluene on bronchioloalveolar cell proliferation during the bleomycin-induced pulmonary fibrosing process in hamsters.
		Related	85	Neuroprotection	ASSOCIATED_WITH	ALZHEIMER DISEASE 18	https://www.ncbi.nlm.nih.gov/pmc/articles/PMC4159602/	The reactive astrocytes are likely a reaction to the A stimulation and may play both a detrimental and neuroprotective role in AD brain 18,56,57.
		Related	86	Stress	COEXISTS_WITH	Alzheimer's Disease	https://www.ncbi.nlm.nih.gov/pmc/articles/PMC2098397/	A grant of ?3,000 was made towards elucidating the response of the endocrine system to stress, and ?1,632 towards clarifying the nature of the intellectual changes occurring in senile dementia.
		Related	87	Stress	CAUSES	Alzheimer Disease, Late Onset	https://www.ncbi.nlm.nih.gov/pmc/articles/PMC5747579/	Lifetime DistressLifetime frequency of stress exposure is consistently associated with the incidence of mild cognitive impairment (MCI) and may increase the risk of late-onset AD [315 317].
		Unrelated	88	genetic vaccine	INHIBITS	Pseudomonas aeruginosa infection	https://pubmed.ncbi.nlm.nih.gov/11292786/	Protection against Pseudomonas aeruginosa chronic lung infection in mice by genetic immunization against outer membrane protein F (OprF) of P. aeruginosa.
		Unrelated	89	HLA class I	INHIBITS	HIV disease progression	https://www.ncbi.nlm.nih.gov/pmc/articles/PMC3966573/	The absence to date of an identified HLA class I molecule that protects against HIV disease progression and yet does not have a dominant Gag-specific response continues to obscure the precise role of epitope and HLA in immune control.
		Related	90	Microhemorrhage	CAUSES	Alzheimer's Disease	https://pubmed.ncbi.nlm.nih.gov/31084613/	The majority of AD patients also have Abeta deposition in cerebral vessels known as cerebral amyloid angiopathy (CAA), microhemorrhages, and vascular co-morbidities, suggesting that cerebrovascular dysfunction contributes to AD etiology.
		Related	91	Neuroprotection	COEXISTS_WITH	Alzheimer's Disease	https://pubmed.ncbi.nlm.nih.gov/9850925/	A further reinforcement of the homeostatic adenosine effects on glial cells by pharmaca, such as propentofylline, may add to neuroprotection in Alzheimer's disease.
		Related	92	tau Proteins	ASSOCIATED_WITH	Alzheimer's Disease	https://pubmed.ncbi.nlm.nih.gov/2424016/	Microtubule-associated protein tau (tau) is a major antigenic component of paired helical filaments in Alzheimer disease.
		Related	93	Neuroprotection	ASSOCIATED_WITH	ALZHEIMER DISEASE 2	https://www.ncbi.nlm.nih.gov/pmc/articles/PMC3357927/	We also discuss the neuroprotective role of microglia in AD.2.
		Unrelated	94	tumor growth	PRODUCES	interleukin-21	https://www.ncbi.nlm.nih.gov/pmc/articles/PMC8164615/	eHSP90 exposed on the surface of tumour released autophagosomes can induce TLR2 MyD88 NF- B signalling cascade and stimulate CD4+ T cells to produce IL-6 that functions in an autocrine manner to promote the production of IL-10 and IL-21, which create a favourable environment to facilitate tumour growth and metastasis in a melanoma mouse model [125] (Fig. 3).
		Related	95	Amyloid beta-Peptides	STIMULATES	Alzheimer's Disease	https://pubmed.ncbi.nlm.nih.gov/8761337/	Moreover, beta-amyloid was capable of inducing an AD-like phenotype for K+ channels and Cp20 in otherwise normal fibroblasts, providing additional evidence for the potential involvement of these components in AD and suggesting a possible pathological consequence of soluble beta-amyloid elevation in AD.
